# Supplementary material for: Mechanochemical solid state synthesis of copper(I)/NHC complexes with K3PO4
Source: publisher site journal article supplement (doi:10.3762/bjoc.19.34), 2023-04-14

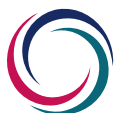

## Supporting Information

for

### **Mechanochemical solid state synthesis of copper(I)/NHC complexes with $K_3PO_4$**

Ina Remy-Speckmann, Birte M. Zimmermann, Mahadeb Gorai, Martin Lerch and Johannes F. Teichert

*Beilstein J. Org. Chem.* **2023**, *19*, 440–447. doi:10.3762/bjoc.19.34

### **General procedures, experimental details, analytical data and copies of NMR spectra**

|                                                                                   |     |
|-----------------------------------------------------------------------------------|-----|
| 1 General information.....                                                        | S3  |
| 1.1 Solvents.....                                                                 | S4  |
| 1.2 Reactions under H <sub>2</sub> pressure .....                                 | S4  |
| 1.3 Chemicals.....                                                                | S4  |
| 2 General procedures .....                                                        | S5  |
| 2.1 General procedure 1 – H <sub>2</sub> -mediated reduction (GP1).....           | S5  |
| 2.2 General procedure 2 – Ball mill synthesis attempts for [CuGua] <b>5</b> ..... | S6  |
| 3 Experimental details.....                                                       | S7  |
| 3.1 Synthesis of [CuGua] <b>5</b> .....                                           | S7  |
| 3.2 Synthesis of standard Cu(I)/NHC-complexes.....                                | S10 |
| 3.2.1 Synthesis of [Cu(IMes)Cl] ( <b>7a</b> ).....                                | S10 |
| 3.2.2 Synthesis of [Cu(SIMes)Cl] ( <b>7b</b> ).....                               | S10 |
| 3.2.3 Synthesis of [Cu(IPr)Cl] ( <b>7c</b> ) .....                                | S11 |
| 3.2.4 Synthesis of [Cu(SIPr)Cl] ( <b>7d</b> ) .....                               | S11 |
| 3.3 Products of catalytic ester reduction with H <sub>2</sub> .....               | S12 |
| 3.3 Evidence for the formation of <b>5</b> ·CO <sub>2</sub> .....                 | S15 |
| 4 References .....                                                                | S17 |
| 5 Spectra.....                                                                    | S18 |

## 1 General information

Liquid state reactions were carried out in flame dried glassware under a nitrogen atmosphere using standard Schlenk techniques. Glassware and stir bars contaminated with transition metals were treated with *aqua regia* (conc. HCl/conc. HNO<sub>3</sub> 3:1) prior to cleaning. For cleaning, glassware and stir bars were kept in an isoPrOH/KOH bath overnight, rinsed with H<sub>2</sub>O, kept in a citric acid/H<sub>2</sub>O bath overnight and finally rinsed with deionized H<sub>2</sub>O and dried at 120 °C. Solutions and reagents were added with nitrogen-flushed disposable syringes/needles. Solvents were added using glass syringes and stainless-steel needles (stored at 120 °C). Analytical thin layer chromatography (TLC) was performed on silica gel 60 G/UV<sub>254</sub> aluminium sheets (*Macherey-Nagel*). Ball-milling experiments were carried out using a *Fritsch Pulverisette 7 classic line* planetary ball mill. NMR spectra were recorded on AV400, AV500 or AV700 instruments (*Bruker*) at the Institut für Chemie of *Technische Universität Berlin*. Chemical shifts are reported in parts per million (ppm) and are referenced to the residual solvent resonance as the internal standard according to the standard literature.<sup>[1]</sup> Data are reported as follows: chemical shift, multiplicity (br s = broad singlet, s = singlet, d = doublet, t = triplet, q = quartet, m = multiplet, m<sub>c</sub> = centrosymmetric multiplet), coupling constants (Hz), integration and – if possible – atom assignment. The assignment refers to the atom number shown in the corresponding molecule figure and was achieved by analysis of DEPT (DEPT 135) and 2D-NMR spectra (COSY, HMQC, HSQC, HMBC, NOESY). If a distinct assignment was not possible, atoms were marked with “\*” and are interchangeable. Designation “Ar” refers to atoms of an aromatic system where a distinct assignment was not possible. Melting points (m.p.) were determined using a Leica Galen III melting point apparatus (*Wagner & Munz*). Infrared (IR) spectra were recorded on a Cary 630 FT-IR spectrometer equipped with an ATR unit (*Agilent Technologies*). Mass spectra (HRMS) were obtained from the Analytical Facility at the Institut für Chemie at *Technische Universität Berlin* (ESI/APCI: LTQ Orbitrap XL, *Thermo Scientific*; EI: GC-system 5975C, HP-5MS, *Agilent Technologies*). Analytical gas chromatography (GC) of reaction mixtures and pure substances was performed using a gas chromatograph 430-GC (*Varian Inc.*). The instrument was equipped with a FactorFour VF-WAXms capillary column (*Varian Inc.*, length: 30 m, inner diameter: 0.25 mm, film thickness of the stationary phase: 0.25 µm). The following temperature program was used for the analysis: carrier gas N<sub>2</sub>; injection temperature 270 °C; detector temperature 270 °C; flow rate 4.0 mL/min; temperature program: 40 °C start temperature, 20 °C/min heating rate to 250 °C for 10 min, then 20 °C/min heating rate to final temperature 260 °C for 5 min. The data was recorded with the program Galaxie 1.9.302.952 (*Varian Inc.*). Elemental analyses were obtained at *Technische Universität Chemnitz* using a vario MICRO cube (*Elementar*),

recording a CHNS analysis. Calibration is done beforehand using sulfanilic acid. Residual solvent was verified by  $^1\text{H}$ .

### 1.1 Solvents

THF and 1,4-dioxane were dried over sodium/benzophenone and distilled under  $\text{N}_2$  atmosphere prior to use.  $\text{Et}_3\text{N}$ ,  $\text{CH}_2\text{Cl}_2$  and MeOH were dried over  $\text{CaH}_2$  and distilled under  $\text{N}_2$  atmosphere prior to use. Acetone and EtOH were distilled under reduced pressure prior to use. Solvents (technical grade) for extraction/chromatography (*n*-pentane, cyclohexane,  $\text{CH}_2\text{Cl}_2$ , *tert*-butyl methyl ether, EtOAc) were distilled under reduced pressure prior to use. Liquid substrates for hydrogenation reactions were degassed prior to use.

### 1.2 Reactions under $\text{H}_2$ pressure

All reactions under  $\text{H}_2$  pressure were carried out in glass vials (50 × 14 mm, *Schütt*), equipped with a magnetic stir bar and a rubber septum in autoclaves BR-100 or Br-300 (including the appropriate heating blocks, *Berghof*). The autoclave was purged with  $\text{N}_2$  (3 × 10 bar) before the vials were placed in the autoclave and the septum was pierced under a counter flow of  $\text{N}_2$ . The autoclave was purged with  $\text{N}_2$  (1 × 1 bar, 3 × 10 bar) and  $\text{H}_2$  (3 × 10 bar) or  $\text{D}_2$  (2 × 5 bar) before the appropriate  $\text{H}_2$  or  $\text{D}_2$  pressure was applied (pressure is given as initial pressure before heating). The heating block was pre-heated before the autoclave was placed inside. After the respective reaction time the autoclave was allowed to cool to rt and  $\text{H}_2$  or  $\text{D}_2$  was released. The autoclave was purged with  $\text{N}_2$  (3 × 10 bar) before the vials were taken out.

### 1.3 Chemicals

All reagents were purchased from established commercial suppliers (*Sigma-Aldrich*, *Alfa Aesar*, *TCI*, *Acros*, *Strem*, *Merck*, *ABCR*, *Fluka*, *Fisher Scientific*) and used without further purification.  $\text{NaOt-Bu}$  was sublimed and stored in an Ar-filled glovebox. 15-crown-5 was dried over 3 Å MS, distilled under  $\text{N}_2$  atmosphere and stored under  $\text{N}_2$  over 3 Å MS.  $\text{H}_2$  (99.999%) and  $\text{D}_2$  (99.8%) was purchased from *Air Liquide*. Methyl 4-(1,3-dioxan-2-yl)benzoate (**10**)<sup>[2]</sup> and 1-(2-(2,3-diisopropyl-1-methylguanidino)ethyl)-3-mesityl-1*H*-imidazol-3-ium bromide (**3**)<sup>[3]</sup> was synthesized following known procedures.

## 2 General procedures

### 2.1 General procedure 1 – H<sub>2</sub>-mediated reduction (GP1)

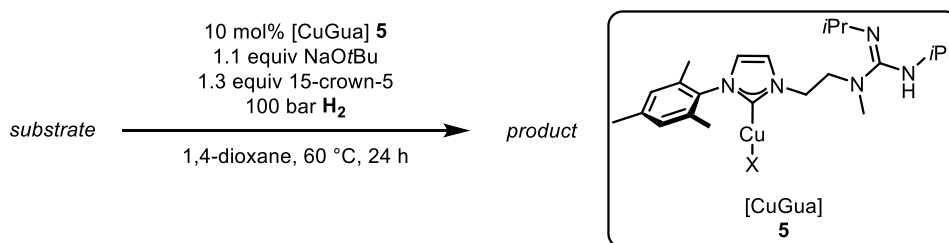

In an Ar-filled glovebox, [CuGua] **5** (28 mg, 6.0  $\mu\text{mol}$ , 10 mol%) and NaOtBu (63 mg, 0.66 mmol, 1.1 equiv) are placed in a 20 mL microwave vial with a stirring bar. The vial is capped inside the glovebox and then transferred outside. The solids are dissolved in 1,4-dioxane (2.8 mL). The mixture is stirred for 5 min at 40  $^\circ\text{C}$ . Dried 15-crown-5 (0.16 mL, 0.78 mmol, 1.3 equiv) is added to the reaction mixture at rt. The degassed substrates (0.60 mmol, 1.0 equiv) are dissolved in 1,4-dioxane (0.7 mL) and transferred to the reaction vial. The vial is placed in an autoclave and the septum is pierced with a needle under N<sub>2</sub>-counterflow. The autoclave is purged with H<sub>2</sub> (3  $\times$  10 bar). The reaction mixture is stirred for 24 h at 60  $^\circ\text{C}$  under H<sub>2</sub>-atmosphere (100 bar). The crude reaction mixture is filtered over a small plug silica (eluant: CH<sub>2</sub>Cl<sub>2</sub>/MeOH, 50:1, 1  $\times$  5 cm, 100 mL) and all volatiles are removed under reduced pressure. The crude products are purified by flash column chromatography on silica gel.

*Notes:* Before transferring the reaction mixture to the autoclave, it was necessary to have a tight closed reaction vial and to work under inert conditions. NaOt-Bu had to be sublimed and stored in a glovebox. 15-crown-5 had to be dried as described before. Between addition of the substrate and pressurizing with H<sub>2</sub> were approximately 5 min.

## 2.2 General procedure 2 – Ball mill synthesis attempts for [CuGua] 5

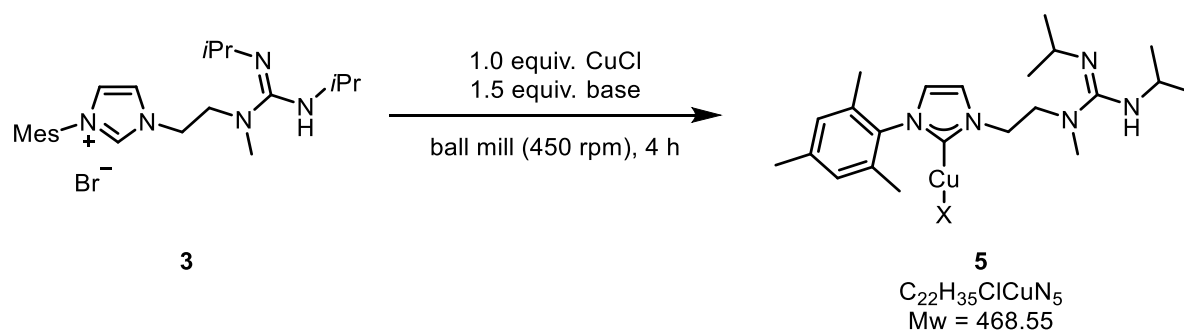

The synthesis was carried out using the *Fritsch Pulverisette 7 classic line*, a high-energy planetary ball mill. The starting materials 1-(2-(2,3-diisopropyl-1-methylguanidino)ethyl)-3-mesityl-1*H*-imidazol-3-ium bromide (**3**, 75 mg, 0.16 mmol, 1.00 equiv), CuCl (16.5 mg, 0.16 mmol, 1.00 equiv) and a base (0.25 mmol, 1.50 equiv) were filled into a 12 mL steel vessel equipped with six steel balls (1 cm diameter). The beaker was sealed in an Ar-filled glovebox. Milling was carried out with 450 rpm for a total of four hours. After each hour the milling was paused for 30 minutes to avoid overheating of the machine. The ground product was mixed with CH<sub>2</sub>Cl<sub>2</sub> (3 mL) and the resulting suspension was filtered over a PTFE syringe filter (0.45 μm). The filtrate was concentrated under reduced pressure.

*Notes:* For experiments with sodium hydride (NaH) as a base a 45 mL zirconia vessel with six zirconia balls (1.5 cm in diameter) was used.

## 3 Experimental details

### 3.1 Synthesis of [CuGua] 5

Scheme S2: Synthesis of [CuGua] 5.<sup>[3]</sup>

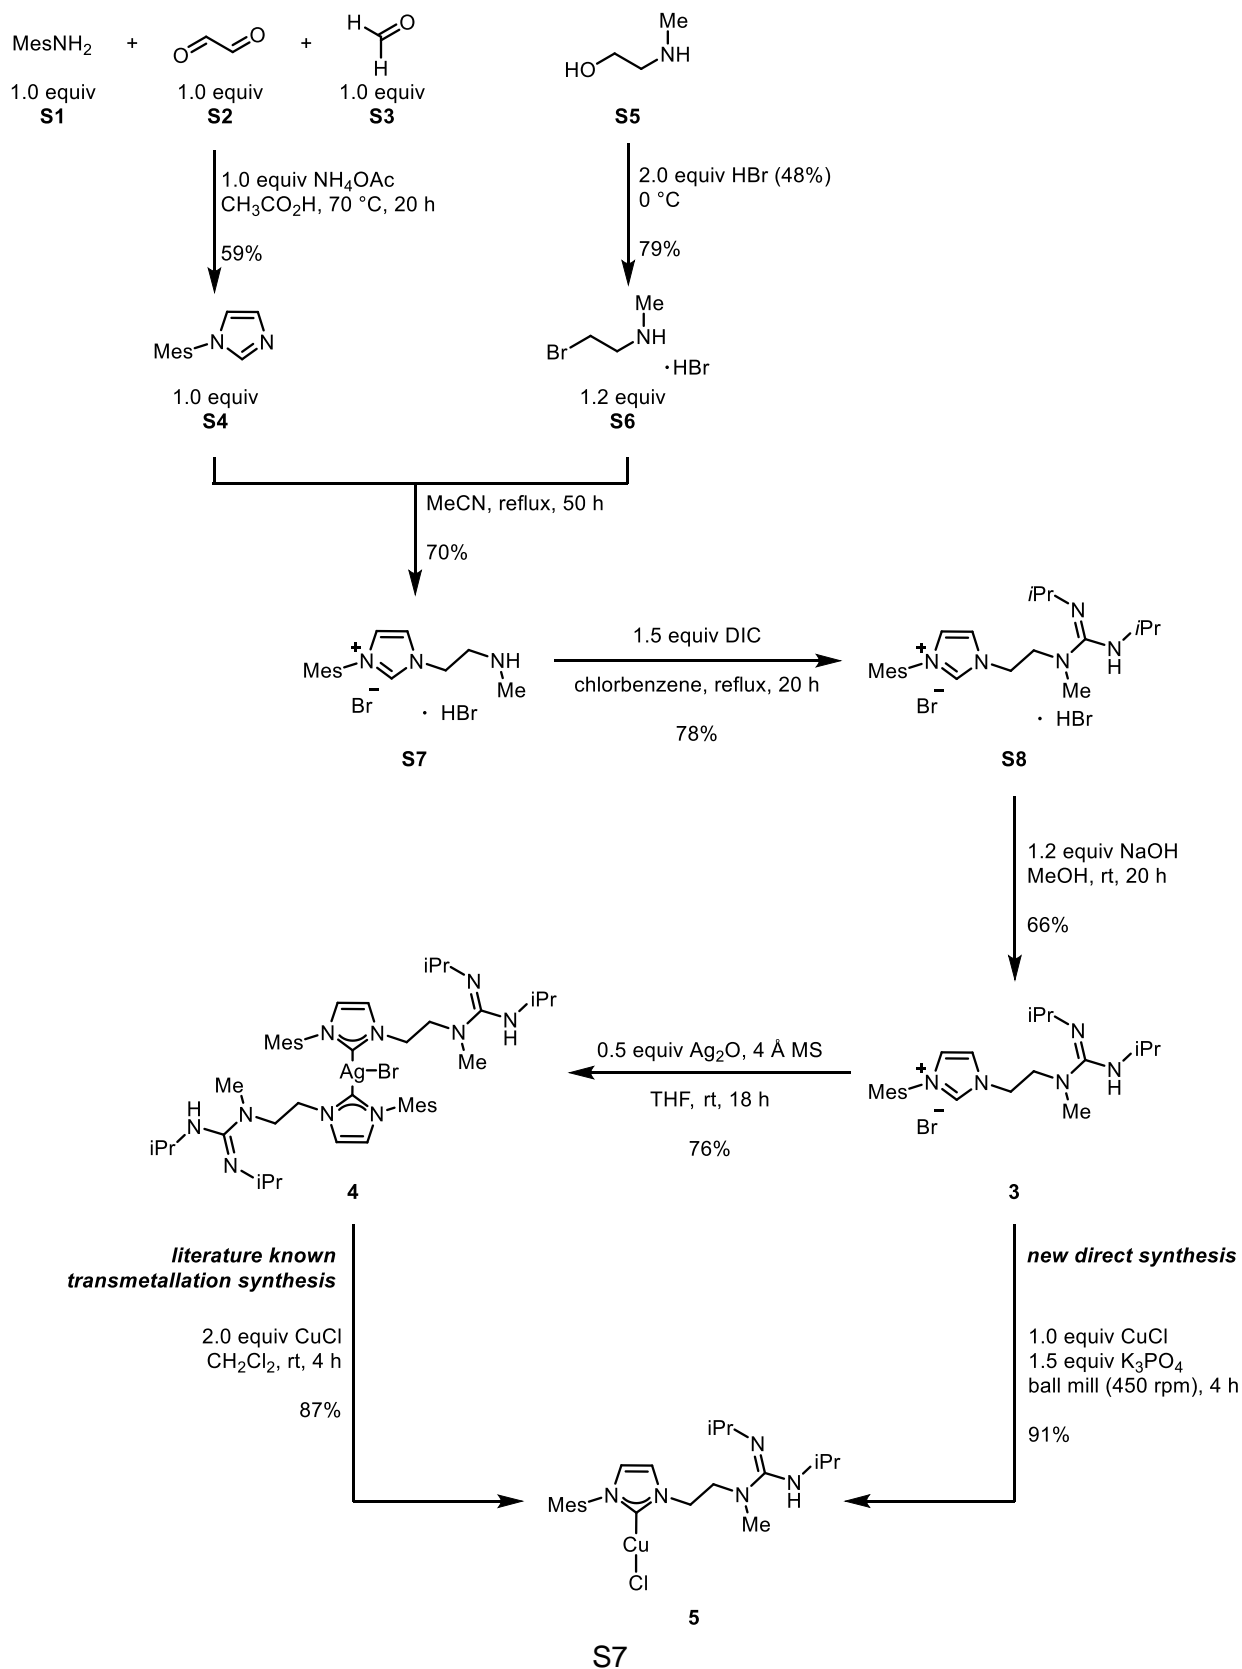

### 3.1.1 (1-(2-(2,3-Diisopropyl-1-methylguanidino)ethyl)-3-mesityl-1,3-dihydro-2H-imidazol-2-ylidene)copper(I) chloride (**5**)

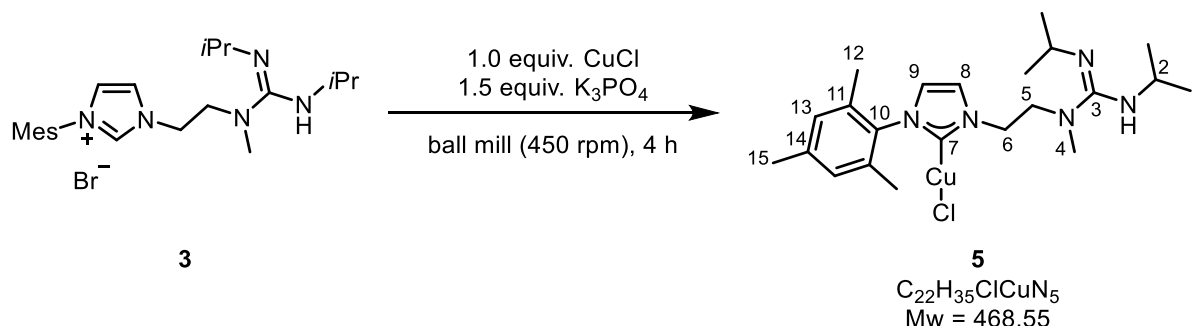

The product was synthesized using a FRITSCHE Pulverisette 7 classic line, a high-energy planetary ball mill. The starting materials 1-(2-(2,3-diisopropyl-1-methylguanidino)ethyl)-3-mesityl-1H-imidazol-3-ium bromide (**3**, 75 mg, 0.16 mmol, 1.00 equiv), CuCl (16.5 mg, 0.16 mmol, 1.00 equiv) and K<sub>3</sub>PO<sub>4</sub> (53 mg, 0.25 mmol, 1.50 equiv) were filled into a 12 mL steel vessel equipped with six steel balls (1 cm diameter). The beaker was sealed in an Ar-filled glovebox. Milling was carried out with 450 rpm for a total of four hours. After each hour the milling was paused for 30 minutes to avoid overheating of the machine. The raw product was obtained as a grey powder after milling. The ground product was mixed with CH<sub>2</sub>Cl<sub>2</sub> (3 mL) and the resulting suspension was filtered over a PTFE syringe filter (0.45 μm). The filtrate was concentrated under reduced pressure. The product **5** was obtained as a colourless solid (86 mg, 0.15 mmol, 91%).

**<sup>1</sup>H NMR** (500 MHz, CD<sub>2</sub>Cl<sub>2</sub>): δ = 1.05–1.12 (m, 12H, H-1), 2.01 (s, 6H, H-12), 2.34 (s, 3H, H-15), 2.82 (s, 3H, H-4), 3.30–3.44 (m, 3H, N–H, H-2), 3.63 (t, <sup>3</sup>J<sub>5,6</sub> = 6.2 Hz, 2H, H-5), 4.39 (t, <sup>3</sup>J<sub>6,5</sub> = 6.2 Hz, 2H, H-6), 6.87 (d, <sup>3</sup>J<sub>8,9</sub> = 1.6 Hz, 1H, H-8), 7.01 (s, 2H, H-13), 7.25 (d, <sup>3</sup>J<sub>9,8</sub> = 1.5 Hz, 1H, H-9) ppm.

**<sup>13</sup>C NMR** (126 MHz, CD<sub>2</sub>Cl<sub>2</sub>): δ = 18.0 (C-12), 21.2 (C-15), 23.9 (C-1a)\*, 25.6 (C-1b)\*, 38.7 (C-4), 46.8 (C-2a)\*\*, 48.3 (C-2b)\*\*, 49.3 (C-6), 52.2 (C-5), 121.8 (C-8), 122.2 (C-9), 129.5 (C-13), 135.3 (C-11), 136.0 (C-10), 139.7 (C-14), 155.9 (C-3), 179.1 (C-7) ppm.

**HRMS** (ESI) for C<sub>22</sub>H<sub>36</sub>ClCuN<sub>5</sub><sup>+</sup> [(M–Cl)<sup>+</sup>]: calculated: 432.2188, found: 432.2179.

**Elemental analysis:** [CH<sub>2</sub>Cl<sub>2</sub> + C<sub>22</sub>H<sub>35</sub>ClCuN<sub>5</sub>]: calculated C: 49.91, found C: 50.22  
 calculated H: 6.74, found H: 6.72  
 calculated N: 12.65, found N: 12.92.

The data is in accordance with literature.<sup>[3]</sup>



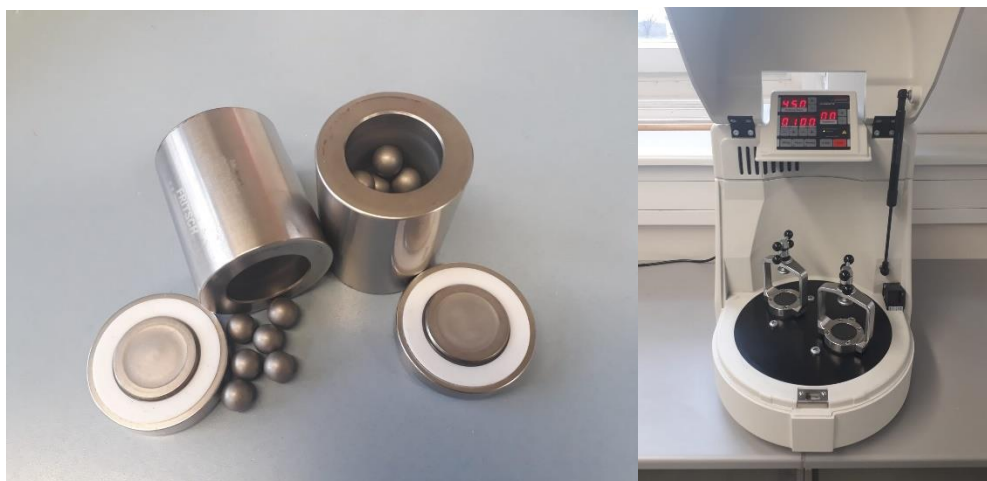

**Figure S2:** FRITSCH Pulverisette 7 classic line.

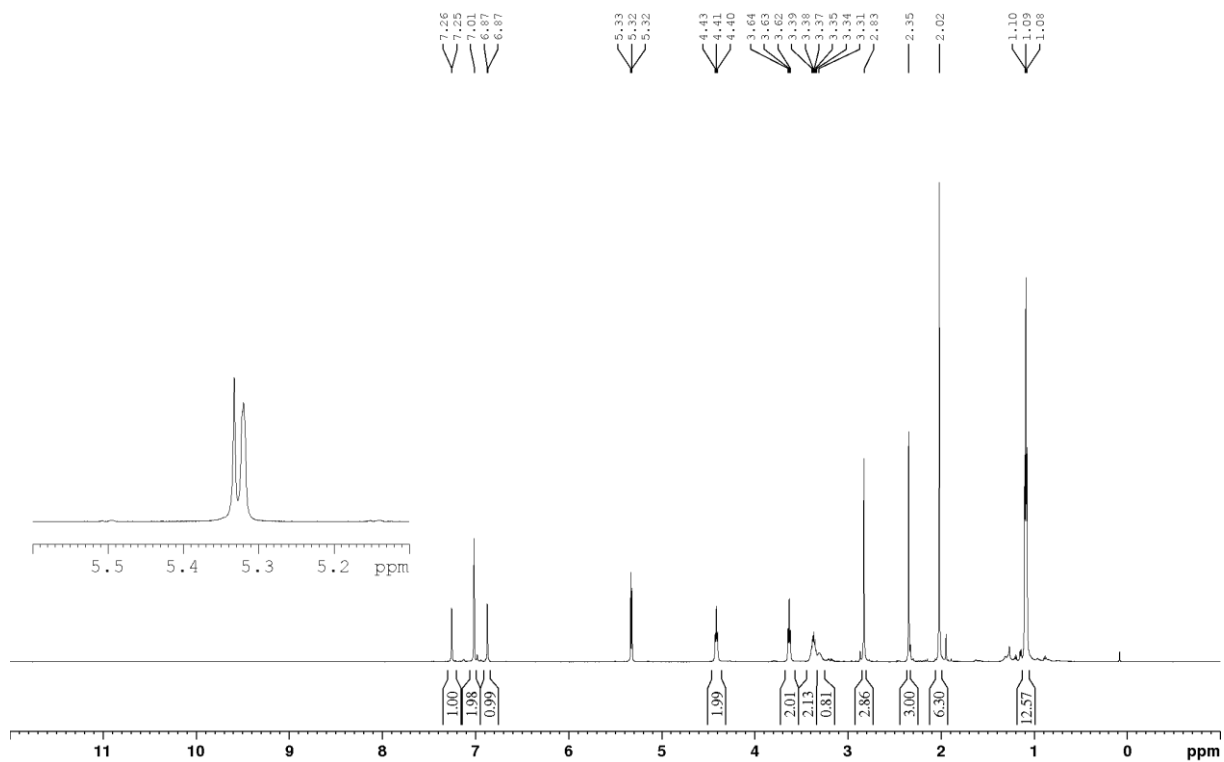

**Figure S3:**  $^1\text{H}$  NMR in  $\text{CD}_2\text{Cl}_2$  of **5** synthesized in a ball mill.

| Nr. | Gewicht [mg] | Name      | Methode    | N-Fläche | C-Fläche | H-Fläche | S-Fläche | N [%] | C [%] | H [%] | S [%] | C/N Verh. |
|-----|--------------|-----------|------------|----------|----------|----------|----------|-------|-------|-------|-------|-----------|
| 23  | 2.0040       | CuGua-INA | 2mgChem70s | 10 002   | 27 238   | 12 146   | 0        | 12.97 | 50.29 | 6.733 | 0.000 | 3.8757    |
| 24  | 2.2570       | CuGua-INA | 2mgChem70s | 11 182   | 30 731   | 13 731   | 0        | 12.86 | 50.36 | 6.724 | 0.000 | 3.9155    |
| 25  | 1.9250       | CuGua-INA | 2mgChem70s | 9 558    | 26 018   | 11 582   | 0        | 12.92 | 50.01 | 6.697 | 0.000 | 3.8722    |

**Figure S4:** Elemental analysis of **5** synthesized in a ball mill.

## 3.2 Synthesis of standard Cu(I)/NHC-complexes

### 3.2.1 Synthesis of [Cu(IMes)Cl] (7a)

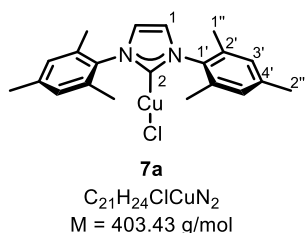

Synthesis was carried out using the FRITSCHE Pulverisette 7 *classic line*, a high-energy planetary ball mill. The starting materials 1,3-bis-(2,4,6-trimethylphenyl)-imidazolium chloride (IMesCl, **6a** (75 mg, 0.22 mmol, 1.00 equiv), CuCl (21.8 mg, 0.22 mmol, 1.00 equiv) and  $K_3PO_4$  (70.1 mg, 0.33 mmol, 1.50 equiv) were filled into a 12 mL steel vessel equipped with six steel balls (1 cm diameter). The beaker was sealed in an Ar-filled glovebox. Milling was carried out with 450 rpm for a total of four hours. After each hour the milling was paused for 30 minutes to avoid overheating of the machine. The ground product was mixed with  $CH_2Cl_2$  (3 mL) and the resulting suspension was filtered over a PTFE syringe filter (0.45  $\mu\text{m}$ ). The filtrate was concentrated under reduced pressure. The product **7a** was obtained as a colourless solid (63.4 mg, 0.15 mmol, 71% [8% cationic dimer complex]).

$^1\text{H NMR}$  (500 MHz,  $CDCl_3$ ):  $\delta = 2.10$  (s, 12H, H-1''), 2.34 (s, 6H, H-2''), 6.99 (s, 4H, H-3'), 7.05 (s, 2H, H-1) ppm.

$^1\text{H NMR}$  for cationic dimer complex (500 MHz,  $CDCl_3$ ):  $\delta = 1.68$  (s, 24H, H-1''), 2.43 (s, 12H, H-2''), 6.89 (s, 8H, H-3'), 7.10 (s, 4H, H-1) ppm.

**HRMS** (ESI) for  $C_{23}H_{27}CuN_3^+ [(M(MeCN))\text{-}Cl^+]$ : calculated: 408.1501, found: 408.1497.

Data is in accordance with literature.<sup>[4]</sup> The amount of the cationic dimer complex was calculated from  $^1\text{H-NMR}$  spectra using the integrals of the signals at 7.05 ppm for the desired complex and 7.10 ppm for the cationic dimer complex.

### 3.2.2 Synthesis of [Cu(SIMes)Cl] (7b)

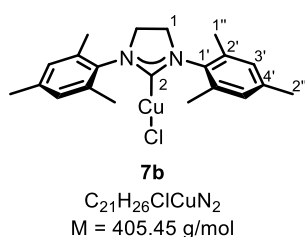

Synthesis was carried out using the FRITSCHE Pulverisette 7 *classic line*, a high-energy planetary ball mill. The starting materials 1,3-bis(2,4,6-trimethylphenyl)imidazolium chloride (SIMesCl, **6b**) (75 mg, 0.22 mmol, 1.00 equiv), CuCl (21.7 mg, 0.22 mmol, 1.00 equiv) and  $K_3PO_4$  (0.70 mg, 0.33 mmol, 1.50 equiv) were filled into a 12 mL steel vessel equipped with six steel balls (1 cm diameter). The beaker was sealed in an Ar-filled glovebox. Milling was carried out with 450 rpm for a total of four hours. After each hour the milling was paused for 30 minutes to avoid overheating of the machine. The ground product was mixed with  $CH_2Cl_2$  (3 mL) and the resulting suspension was filtered over a PTFE syringe filter (0.45  $\mu\text{m}$ ). The filtrate was concentrated under reduced pressure. The product **7b** was obtained as a colourless solid (64.5 mg, 0.16 mmol, 73%).

$^1\text{H NMR}$  (500 MHz,  $CDCl_3$ ):  $\delta = 12.29$  (s, 6H, H-2''), 2.31 (s, 12H, H-1''), 3.96 (s, 4H, H-1), 6.95 (s, 4H, H-3') ppm.

**HRMS** (ESI) for  $C_{23}H_{29}CuN_3^+ [(M(MeCN))\text{-}Cl^+]$ : calculated: 410.1657, found: 410.1652.

The data is in accordance with literature.<sup>[4]</sup>

### 3.2.3 Synthesis of [Cu(IPr)Cl] (7c)

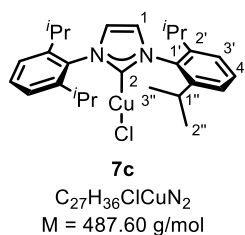

Synthesis was carried out using the FRITSCH Pulverisette 7 *classic line*, a high-energy planetary ball mill. The starting materials 1,3-bis-(2,6-diisopropylphenyl)imidazolium chloride (IPrCl, **6c**) (75 mg, 0.18 mmol, 1.00 equiv), CuCl (17.5 mg, 0.18 mmol, 1.00 equiv) and  $K_3PO_4$  (56.2 mg, 0.27 mmol, 1.50 equiv) were filled into a 12 mL steel vessel equipped with six steel balls (1 cm diameter). The beaker was sealed in an Ar-filled glovebox. Milling was carried out with 450 rpm for a total of six hours. After each hour the milling was paused for 30 minutes to avoid overheating of the machine. The ground product was mixed with  $CH_2Cl_2$  (3 mL) and the resulting suspension was filtered over a PTFE syringe filter (0.45  $\mu$ m). The resulting solution was filtered over silica and the filtrate was concentrated under reduced pressure. The product **7c** was obtained as a colourless solid (54.0 mg, 0.11 mmol, 63%).

**$^1H$  NMR** (500 MHz,  $CDCl_3$ ):  $\delta$  = 1.22 (d,  $^3J$  = 6.9 Hz, 12H, H-2''\*), 1.30 (d,  $^3J$  = 6.9 Hz, 12H, H-3''\*), 2.56 (sept,  $^3J$  = 6.9 Hz, 4H, H-1''), 7.12 (s, 2H, H-1), 7.29 (d,  $^3J$  = 7.8 Hz, 4H, H-3'), 7.49 (t,  $^3J$  = 7.8 Hz, 2H, H-4').

**HRMS** (ESI) for  $C_{29}H_{39}CuN_3^+ [(M(MeCN))\text{-}Cl^+]$ : calculated: 492.2440, found: 492.2430.

Data is in accordance with literature.<sup>[5]</sup>

### 3.2.4 Synthesis of [Cu(SIPr)Cl] (7d)

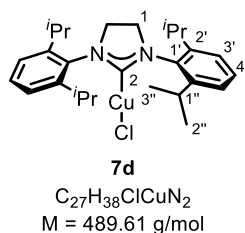

Synthesis was carried out using the FRITSCH Pulverisette 7 *classic line*, a high-energy planetary ball mill. The starting materials 1,3-Bis-(2,6-diisopropylphenyl)-imidazolium chloride (SIPrCl, **6d**) (75 mg, 0.18 mmol, 1.00 equiv), CuCl (17.4 mg, 0.18 mmol, 1.00 equiv) and  $K_3PO_4$  (55.9 mg, 0.26 mmol, 1.50 equiv) were filled into a 12 mL steel vessel equipped with six steel balls (1 cm diameter). The beaker was sealed in an Ar-filled glovebox. Milling was carried out with 450 rpm for a total of four hours. After each hour the milling was paused for 30 minutes to avoid overheating of the machine. The ground product was mixed with  $CH_2Cl_2$  (3 mL) and the resulting suspension was filtered over a PTFE syringe filter (0.45  $\mu$ m). The filtrate was concentrated under reduced pressure. The product **7d** was obtained as a colourless solid (55.1 mg, 0.11 mmol, 64% [12% cationic dimer complex]).

**HRMS** (ESI) for  $C_{29}H_{41}CuN_3^+ [(M(MeCN))\text{-}Cl^+]$ : calculated: 494.2596, found: 494.2588.

**<sup>1</sup>H NMR** (500 MHz, CDCl<sub>3</sub>): δ = 1.34 (d, <sup>3</sup>J = 6.9 Hz, 12H, H-2''\*), 1.37 (d, <sup>3</sup>J = 6.9 Hz, 12H, H-3''\*), 3.00-3.11 (m, 5H, H-1''), 4.01 (s, 4H, H-1), 7.24 (d, <sup>3</sup>J = 7.8 Hz, 4H, H-3'), 7.40 (t, <sup>3</sup>J = 7.8 Hz, 2H, H-4') ppm.

**<sup>1</sup>H NMR** for cationic dimer complex (500 MHz, CDCl<sub>3</sub>): δ = 1.26 (d, <sup>3</sup>J = 6.8 Hz, 24H, H-2''\*), 1.41 (d, <sup>3</sup>J = 6.8 Hz, 24H, H-3''\*), 3.00-3.11 (m, 10H, H-1''), 4.88 (s, 8H, H-1), 7.29 (d, <sup>3</sup>J = 7.8 Hz, 8H, H-3'), 7.40 (t, <sup>3</sup>J<sub>5,6</sub> = 7.8 Hz, 4H, H-4') ppm.

Data is in accordance with literature.<sup>[5]</sup> The amount of the cationic dimer complex was calculated from <sup>1</sup>H NMR spectra using the integrals of the signals at 7.40 ppm for the desired complex and 7.48 ppm for the cationic dimer complex. The signal at 3.00–3.11 ppm integrates too high because of an overlap of signals for the desired complex and the cationic dimer complex.

### 3.3 Products of catalytic ester reduction with H<sub>2</sub>

#### 3.3.1 Benzyl alcohol (**9**)

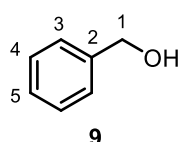

C<sub>7</sub>H<sub>8</sub>O  
M<sub>w</sub> = 108.14

Prepared according to **GP1** from benzaldehyde (**14**, 42 μL, 0.40 mmol, 1.0 equiv), [CuGua] **5bm** (19 mg, 40 μmol, 10 mol %), NaO*t*-Bu (42 mg, 0.44 mmol, 1.1 equiv), 15-crown-5 (0.10 ml, 0.52 mmol, 1.3 equiv.) in 1,4-dioxane (3.0 mL). The reaction mixture was stirred for 24 h at 70 °C. After GC analysis 95% conversion to the alcohol **9** was achieved. Purification by flash column chromatography on silica gel (*n*-pentane/*tert*-butyl methyl ether = 5:1) yielded **9** as colourless oil (34 mg, 0.32 mmol, 79%)

R<sub>f</sub> = 0.43 (SiO<sub>2</sub>, *n*-pentane/*tert*-butyl methyl ether = 1:1).

**<sup>1</sup>H NMR** (500 MHz, CDCl<sub>3</sub>): δ = 1.89 (br s, 1H, O–H), 4.69 (s, 2H, H-1), 7.28–7.33 (m, 1H, H-5), 7.36–7.38 (m, 4H, H-3, H-4) ppm.

**<sup>13</sup>C NMR** (126 MHz, CDCl<sub>3</sub>): δ = 65.4 (C-1), 127.0 (C-3), 127.7 (C-5), 128.6 (C-4), 140.9 (C-2) ppm.

**HRMS** (APCI) for C<sub>7</sub>H<sub>7</sub><sup>+</sup> [(M–OH)<sup>+</sup>] calculated: 91.0548, found: 91.0542.

The data is in accordance with literature.<sup>[6]</sup>

### 3.3.2 Benzyl alcohol (9)

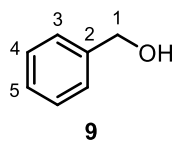

$C_7H_8O$   
Mw = 108.14

Prepared according to **GP1** from ethylbenzoate (**8**, 60  $\mu$ L, 0.40 mmol, 1.0 equiv), [CuGua] **5bm** (19 mg, 40  $\mu$ mol, 10 mol %), NaOt-Bu (42 mg, 0.44 mmol, 1.1 equiv), 15-crown-5 (0.10 ml, 0.52 mmol, 1.3 equiv) in 1,4-dioxane (3.0 mL). The reaction mixture was stirred for 24 h at 70 °C. After GC analysis 65% conversion to the alcohol **9** was achieved. Purification by flash column chromatography on silica gel (*n*-pentane/*tert*-butyl methyl ether = 5:1) yielded **9** as colourless oil (23 mg, 0.21 mmol, 53%).

$R_f$  = 0.43 (SiO<sub>2</sub>, *n*-pentane/*tert*-butyl methyl ether = 1:1).

<sup>1</sup>H NMR (500 MHz, CDCl<sub>3</sub>):  $\delta$  = 1.99 (br s, 1H, O–H), 4.68 (s, 2H, H-1), 7.28–7.33 (m, 1H, H-5), 7.37–7.40 (m, 4H, H-3, H-4) ppm.

<sup>13</sup>C NMR (126 MHz, CDCl<sub>3</sub>):  $\delta$  = 65.4 (C-1), 127.0 (C-3), 127.7 (C-5), 128.6 (C-4), 140.9 (C-2) ppm.

HRMS (APCI) for C<sub>7</sub>H<sub>7</sub><sup>+</sup> [(M–OH)<sup>+</sup>] calculated: 91.0548, found: 91.0542.

The data is in accordance with literature.<sup>[6]</sup>

### 3.3.3 (4-(1,3-Dioxan-2-yl)phenyl)methanol (11)

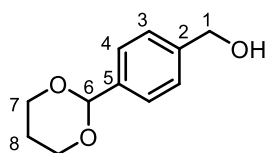

$C_{11}H_{14}O_3$   
Mw = 194.23

Prepared according to **GP1** from methyl 4-(1,3-dioxan-2-yl)benzoate (**10**, 78 mg, 40 mmol, 1.0 equiv), [CuGua] **5bm** (19 mg, 40  $\mu$ mol, 10 mol%), NaOt-Bu (42 mg, 0.44 mmol, 1.1 equiv), 15-crown-5 (0.10 ml, 0.52 mmol, 1.3 equiv) in 1,4-dioxane (3.0 mL). The reaction mixture was stirred for 24 h at 70 °C. After GC analysis 74% conversion to the alcohol **11** was achieved. Purification by flash column chromatography on silica gel (*n*-pentane/*tert*-butyl methyl ether = 1:1) yielded **11** as white solid (51 mg, 0.26 mmol, 66%)

**Mp**: 98 °C.  $R_f$  = 0.27 (SiO<sub>2</sub>, *n*-pentane/*tert*-butyl methyl ether = 1:1).

<sup>1</sup>H NMR (500 MHz, CDCl<sub>3</sub>):  $\delta$  = 1.43 (d sept, <sup>2</sup> $J_{8\alpha,8\beta}$  = 13.5 Hz, <sup>3</sup> $J_{8\alpha,7}$  = 1.5 Hz, 1H, H-8 $\alpha$ ), 2.00 (t, <sup>3</sup> $J_{O-H,1}$  = 5.7 Hz, 1H, O–H), 2.22 (m, 1H, H-8 $\beta$ ), 3.98 (m, 2H, H-7), 4.26 (m, 2H, H-7), 4.63 (d, <sup>3</sup> $J_{1,O-H}$  = 5.4 Hz, 2H, H-1), 5.49 (s, 1H, H-6), 7.32 (d, <sup>3</sup> $J_{3,4}$  = 8.2 Hz, 2H, H-3), 7.45 (d, <sup>3</sup> $J_{4,3}$  = 8.2 Hz, 2H, H-4) ppm.

<sup>13</sup>C NMR (126 MHz, CDCl<sub>3</sub>):  $\delta$  = 25.7 (C-8), 65.0 (C-1), 67.4 (C-7), 101.5 (C-6), 126.2 (C-3), 126.7 (C-4), 138.0 (C-5), 141.6 (C-2) ppm.

HRMS (APCI) for C<sub>11</sub>H<sub>15</sub>O<sub>3</sub><sup>+</sup> [(M+H)<sup>+</sup>] calculated: 195.1016, found: 195.1017.

**IR** (ATR):  $\tilde{\nu}$  = 3317(m), 2938(m), 2911(m), 2863(m), 2733(m), 2301(m), 2218(w), 2087(w), 2004(w), 1920(w), 1824(w), 1651(w), 1466(m), 1381(s), 1353(m), 1282(m), 1236(m), 1124(m), 1010(m), 987(m), 829(s), 773(s), 665(m)  $\text{cm}^{-1}$ .

### 3.3.4 (Z)-1,2-Diphenylethene (13)

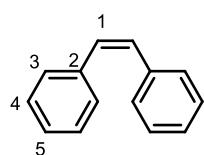

**13**

$\text{C}_{14}\text{H}_{12}$   
Mw = 180.25

Prepared according to **GP1** from diphenylacetylene (**12**, 72 mg, 0.40 mmol, 1.0 equiv), [CuGua] **5bm** (19 mg, 40  $\mu\text{mol}$ , 10 mol %), NaOt-Bu (42 mg, 0.44 mmol, 1.1 equiv), 15-crown-5 (0.10 ml, 0.52 mmol, 1.3 equiv) in 1,4-dioxane (3.0 mL). The reaction mixture was stirred for 24 h at 70 °C. After GC analysis full conversion to the alkene **13** was achieved. Purification by flash column chromatography on silica gel (*n*-pentane) yielded **13** as colourless oil

(62 mg, 0.34 mmol, 86%).

$R_f$  = 0.95 ( $\text{SiO}_2$ , *n*-pentane).

**$^1\text{H}$  NMR** (500 MHz,  $\text{CDCl}_3$ ):  $\delta$  = 6.64 (s, 2H, H-1), 7.20–7.24 (m, 2H, H-5), 7.24–7.27 (m, 4H, H-4), 7.28–7.30 (m, 4H, H-3) ppm.

**$^{13}\text{C}$  NMR** (126 MHz,  $\text{CDCl}_3$ ):  $\delta$  = 127.1 (C-5), 128.2 (C-3), 128.9 (C-4), 130.3 (C-1), 137.3 (C-2) ppm.

**HRMS** (APCI) for  $\text{C}_{14}\text{H}_{12}^{+}$  [ $\text{M}^+$ ] calculated: 180.0939, found: 180.0933. The data is in accordance with literature.<sup>[7]</sup>

### 3.3.5 1-Phenylethan-1-ol (16)

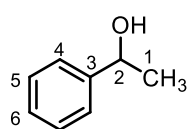

**16**

$\text{C}_8\text{H}_{10}\text{O}$   
Mw = 122.17

Prepared according to **GP1** from acetophenone (**15**, 48  $\mu\text{L}$ , 0.40 mmol, 1.0 equiv), [CuGua] **5bm** (19 mg, 40  $\mu\text{mol}$ , 10 mol %), NaOt-Bu (42 mg, 0.44 mmol, 1.1 equiv), 15-crown-5 (0.10 ml, 0.52 mmol, 1.3 equiv) in 1,4-dioxane (3.0 ml). The reaction mixture was stirred for 24 h at 70 °C. After GC analysis full conversion to the alcohol **16** was achieved. Purification by flash

column chromatography on silica gel (*n*-pentane/*tert*-butyl methyl ether = 5:1) yielded **16** as colourless oil (36 mg, 0.29 mmol, 73%)

$R_f$  = 0.47 ( $\text{SiO}_2$ , *n*-pentane/*tert*-butyl methyl ether = 1:1).

**$^1\text{H}$  NMR** (500 MHz,  $\text{CDCl}_3$ ):  $\delta$  = 1.50 (d,  $^3J_{1,2}$  = 6.5 Hz, 3H, H-1), 2.00 (d,  $^3J_{\text{O-H},2}$  = 3.6 Hz, 1H, O-H), 4.89 (dq,  $^3J_{2,\text{O-H}}$  = 3.6 Hz,  $^3J_{2,1}$  = 6.5 Hz, 1H, H-2), 7.26–7.30 (m, 1H, H-6), 7.34–7.39 (m, 2H, H-4, H-5) ppm.

**$^{13}\text{C}$  NMR** (126 MHz,  $\text{CDCl}_3$ ):  $\delta$  = 25.2 (C-1), 70.4 (C-2), 125.4 (C-4), 127.5 (C-6), 128.5 (C-5), 145.8 (C-3) ppm.

**HRMS** (APCI) for  $C_8H_9^+ [(M-OH)^+]$  calculated: 105.0704, found: 105.0698.

The data is in accordance with literature.<sup>[8]</sup>

### 3.3 Evidence for the formation of $5 \cdot CO_2$

Attempts were carried out to isolate and characterize the suggested  $CO_2$  adduct of complex **5**. However, the complex could not be isolated due to limited stability. Nevertheless, the crude  $^1H$  NMR spectrum as follows shows that all key resonances are present. Further evidence comes from the HRMS of the crude mixture as depicted below.

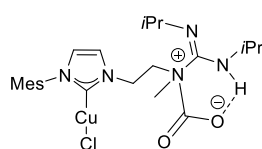

**5**· $CO_2$   
 $C_{23}H_{35}ClCuN_5O_2$   
Mw = 512.56  
calculated  $[M] + H^+$ : 512.1848

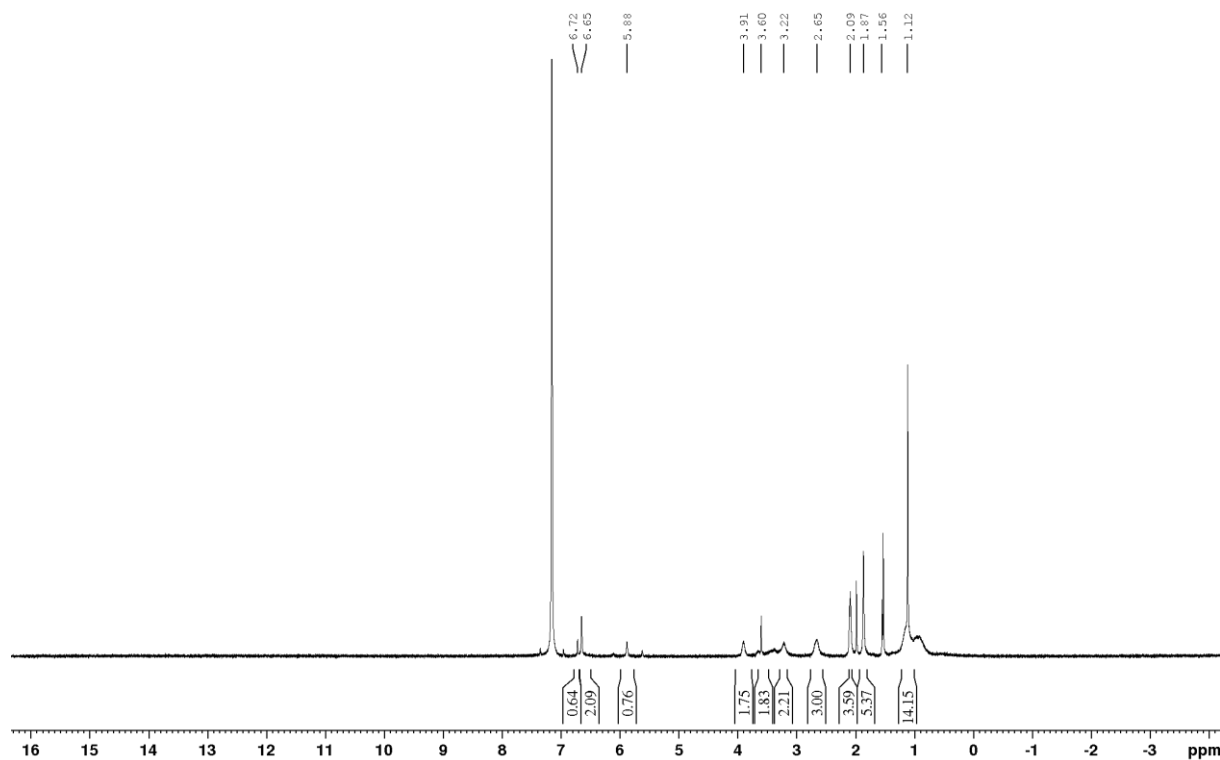

**Figure S5:** Crude  $^1H$  NMR of  $5 \cdot CO_2$ .

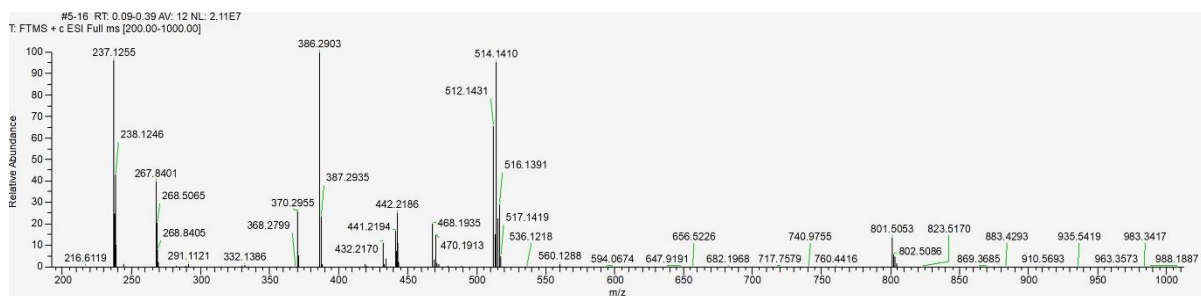

**Figure S6:** Mass spectrum of **5**-CO<sub>2</sub>.

In addition to these data, reactivity studies further support the formation of a CO<sub>2</sub> adduct with complex **5**, and that this adduct is catalytically inactive: When the standard catalytic hydrogenation of ethyl benzoate was carried out under standard conditions,<sup>[9]</sup> but CO<sub>2</sub> was bubbled through the solution of **5** at rt for 5 minutes prior to the catalytic reaction, no conversion in the catalytic hydrogenation of esters was observed.

This shows that coordination of CO<sub>2</sub> to the complex prevents any reactivity in the catalytic ester hydrogenation. This finding is in support of our hypothesis that the guanidine subunit is turned into a hydrogen bond donor upon protonation in situ. Complexation of CO<sub>2</sub> prevents the formation of any hydrogen bonds to the ester substrate, resulting in an inactive catalyst.

We have furthermore measured the elemental analysis of the CO<sub>2</sub> adduct of **5** after several months of storage in an Ar filled glovebox:

**Elemental analysis:** [C<sub>23</sub>H<sub>36</sub>ClCuN<sub>5</sub>O<sub>2</sub>]:  
 calculated C: 53.79, found C: 53.67  
 calculated H: 7.07, found H: 7.16  
 calculated N: 13.64, found N: 12.36.



## 4 References

- [1] a) G. R. Fulmer, A. J. M. Miller, N. H. Sherden, H. E. Gottlieb, A. Nudelman, B. M. Stoltz, J. E. Bercaw, K. I. Goldberg, *Organometallics* **2010**, *29*, 2176; b) H. E. Gottlieb, V. Kotlyar, A. Nudelman, *J. Org. Chem.* **1997**, *62*, 7512.
- [2] S. He, G. Dong, Z. Wang, W. Chen, Y. Huang, Z. Li, Y. Jiang, N. Liu, J. Yao, Z. Miao et al., *ACS Med. Chem. Lett.* **2015**, *6*, 239.
- [3] C.-C. Tai, M.-S. Yu, Y.-L. Chen, W.-H. Chuang, T.-H. Lin, G. P. A. Yap, T.-G. Ong, *Chem. Commun.* **2014**, *50*, 4344.
- [4] G. Pisanò, C. S. J. Cazin, *Green Chem.* **2020**, *22*, 5253.
- [5] O. Santoro, A. Collado, A. M. Z. Slawin, S. P. Nolan, C. S. J. Cazin, *Chem. Commun.* **2013**, *49*, 10483.
- [6] R. Cano, M. Yus, D. J. Ramón, *Tetrahedron* **2011**, *67*, 8079.
- [7] F. Pape, N. O. Thiel, J. F. Teichert, *Chem. Eur. J.* **2015**, *21*, 15934.
- [8] S.-F. Hsu, B. Plietker, *Chem. Eur. J.* **2014**, *20*, 4242.
- [9] B.M. Zimmermann, T. Tran Ngoc, D.-I. Tzaras, T. Kaicharla, J.F. Teichert, *J. Am. Chem. Soc.* **2021**, *143*, 16865–16873.

## 5 Spectra

**(1-(2-(2,3-Diisopropyl-1-methylguanidino)ethyl)-3-mesityl-1,3-dihydro-2H-imidazol-2-ylidene)copper(I) chloride in CD<sub>2</sub>Cl<sub>2</sub> (5)  
via ball mill**

<sup>1</sup>H NMR

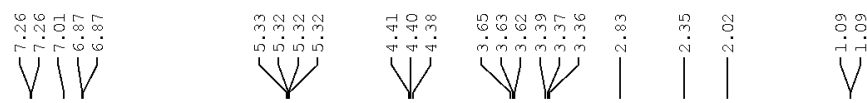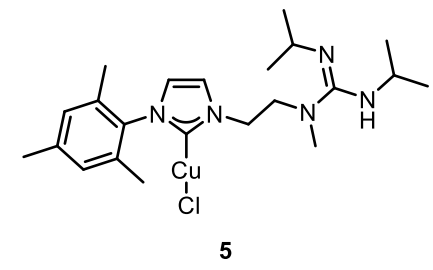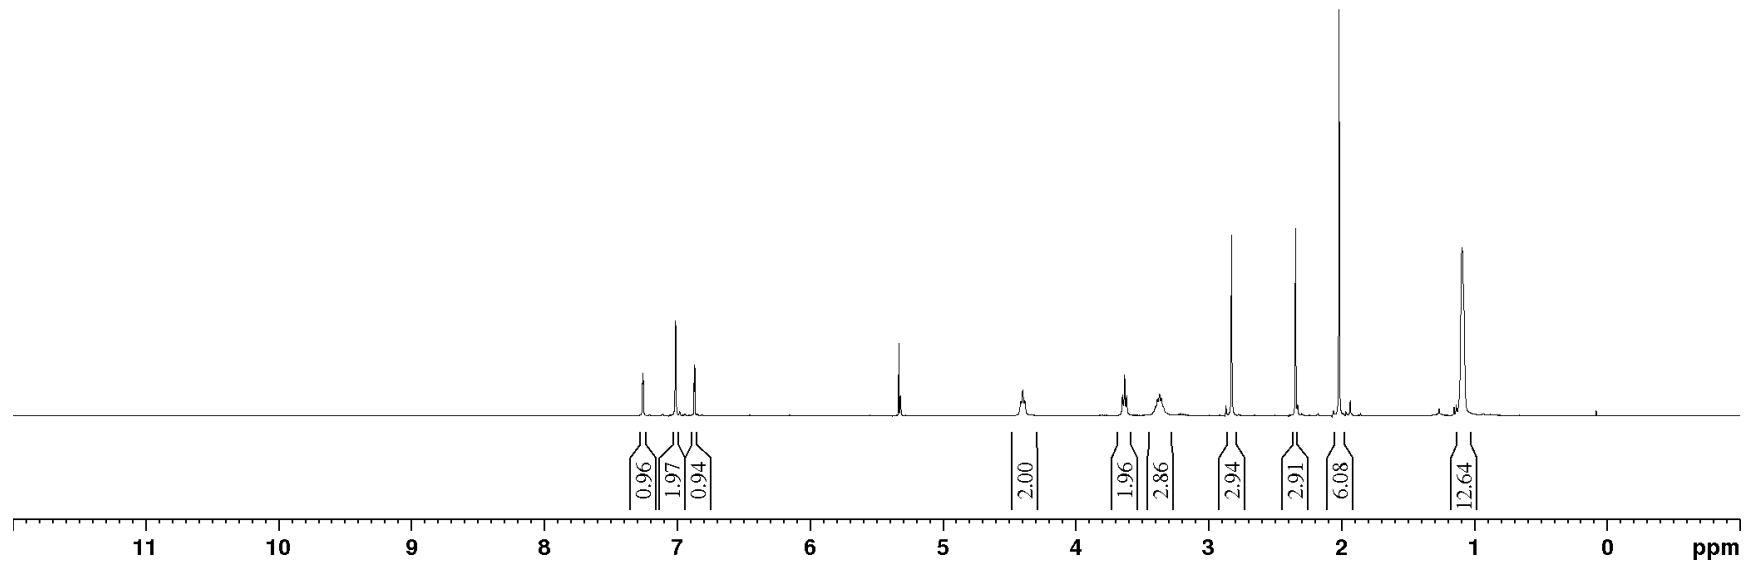

<sup>13</sup>C NMR

179.1  
156.0  
139.7  
136.0  
135.3  
129.6  
122.2  
121.9  
52.3  
49.3  
48.3  
46.9  
38.7  
25.6  
24.0  
21.2  
18.0

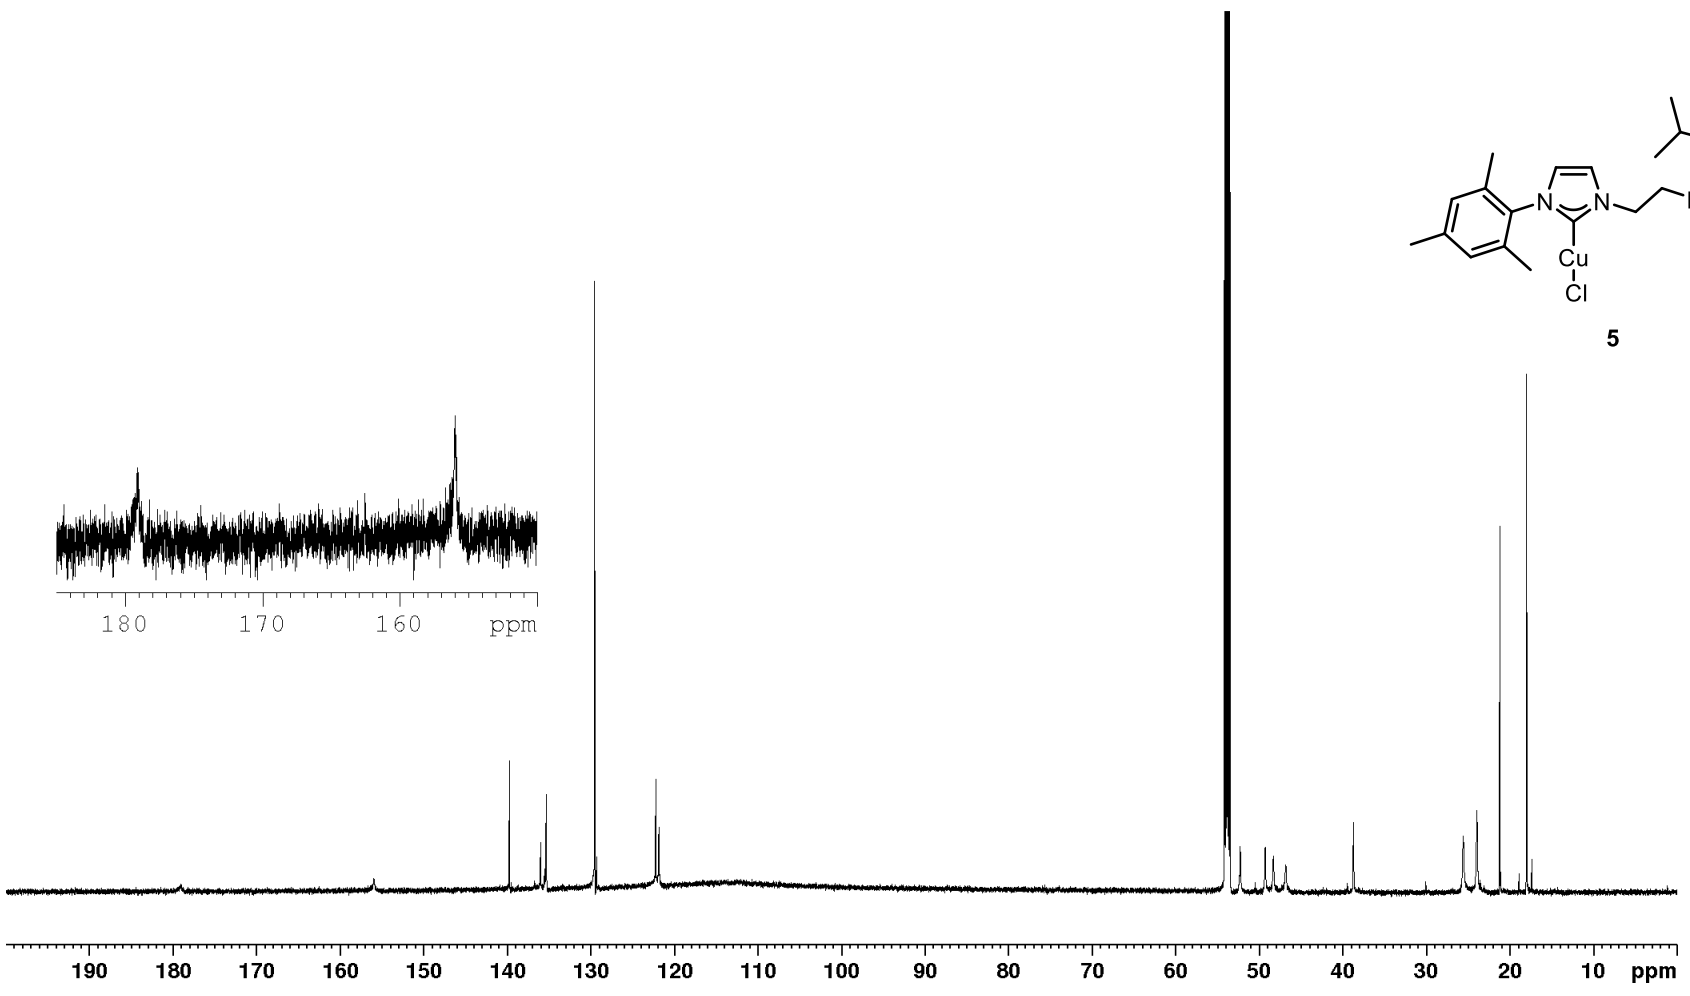

$^1\text{H}$ - $^1\text{H}$  COSY

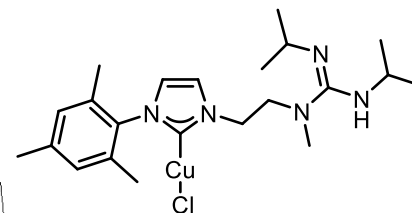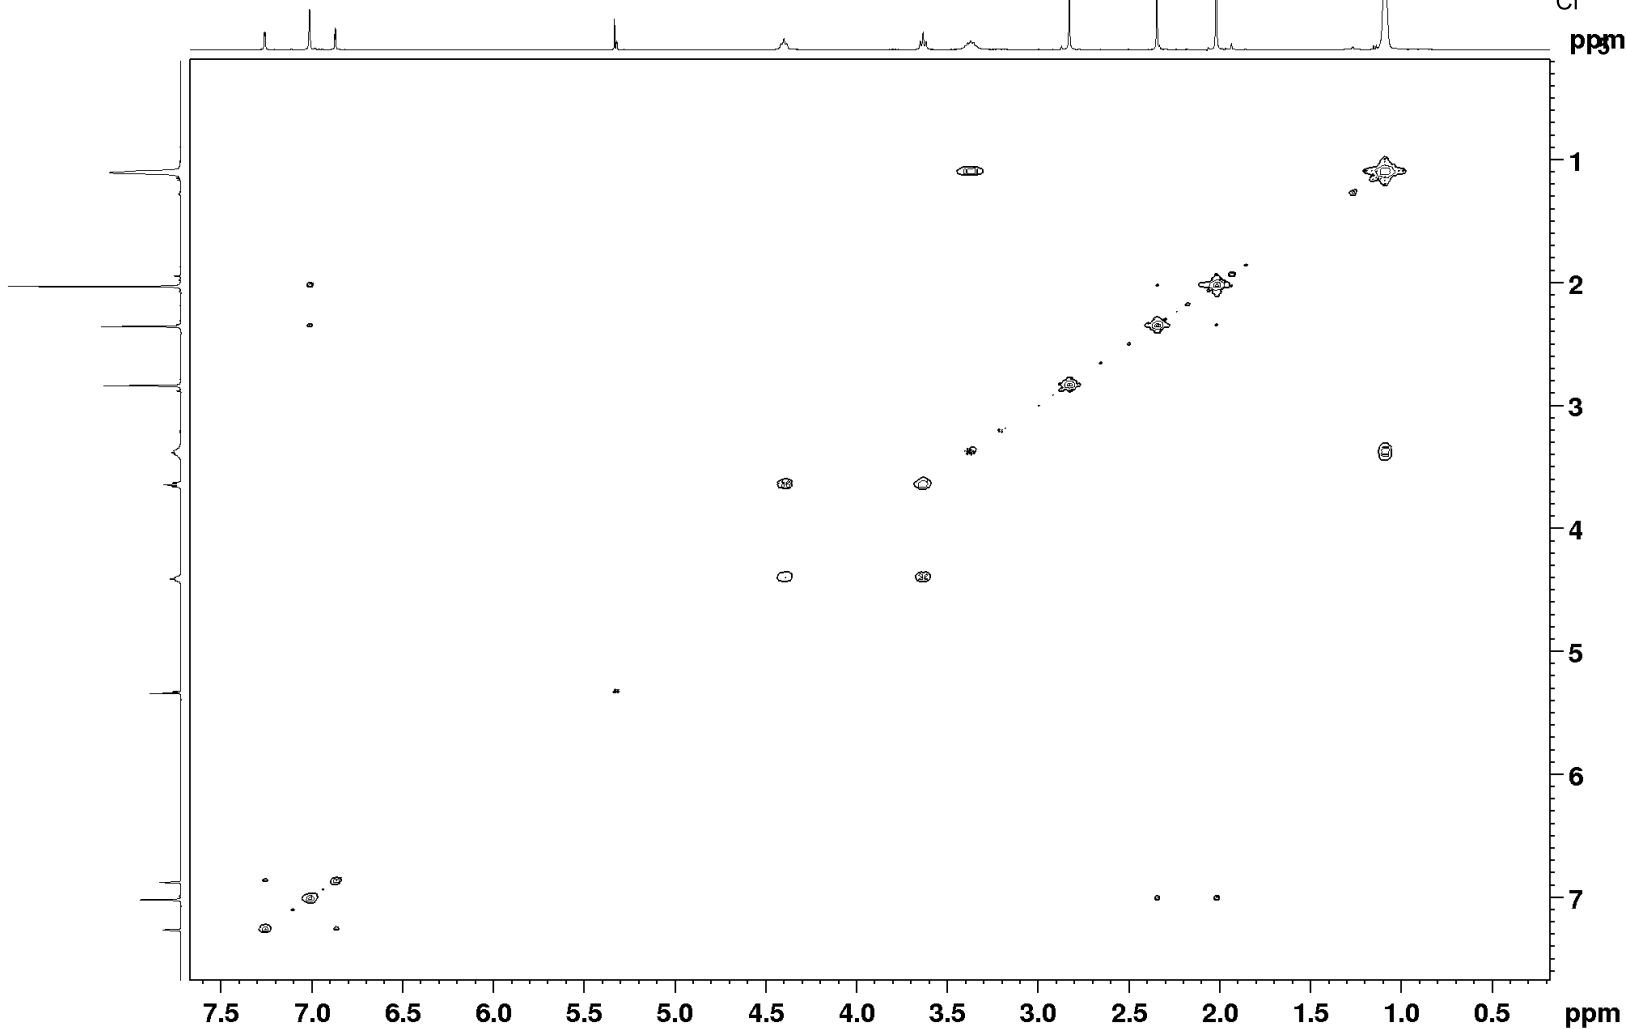

$^1\text{H}$ - $^{13}\text{C}$  HSQC

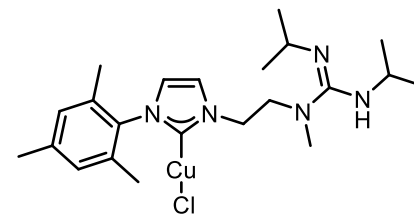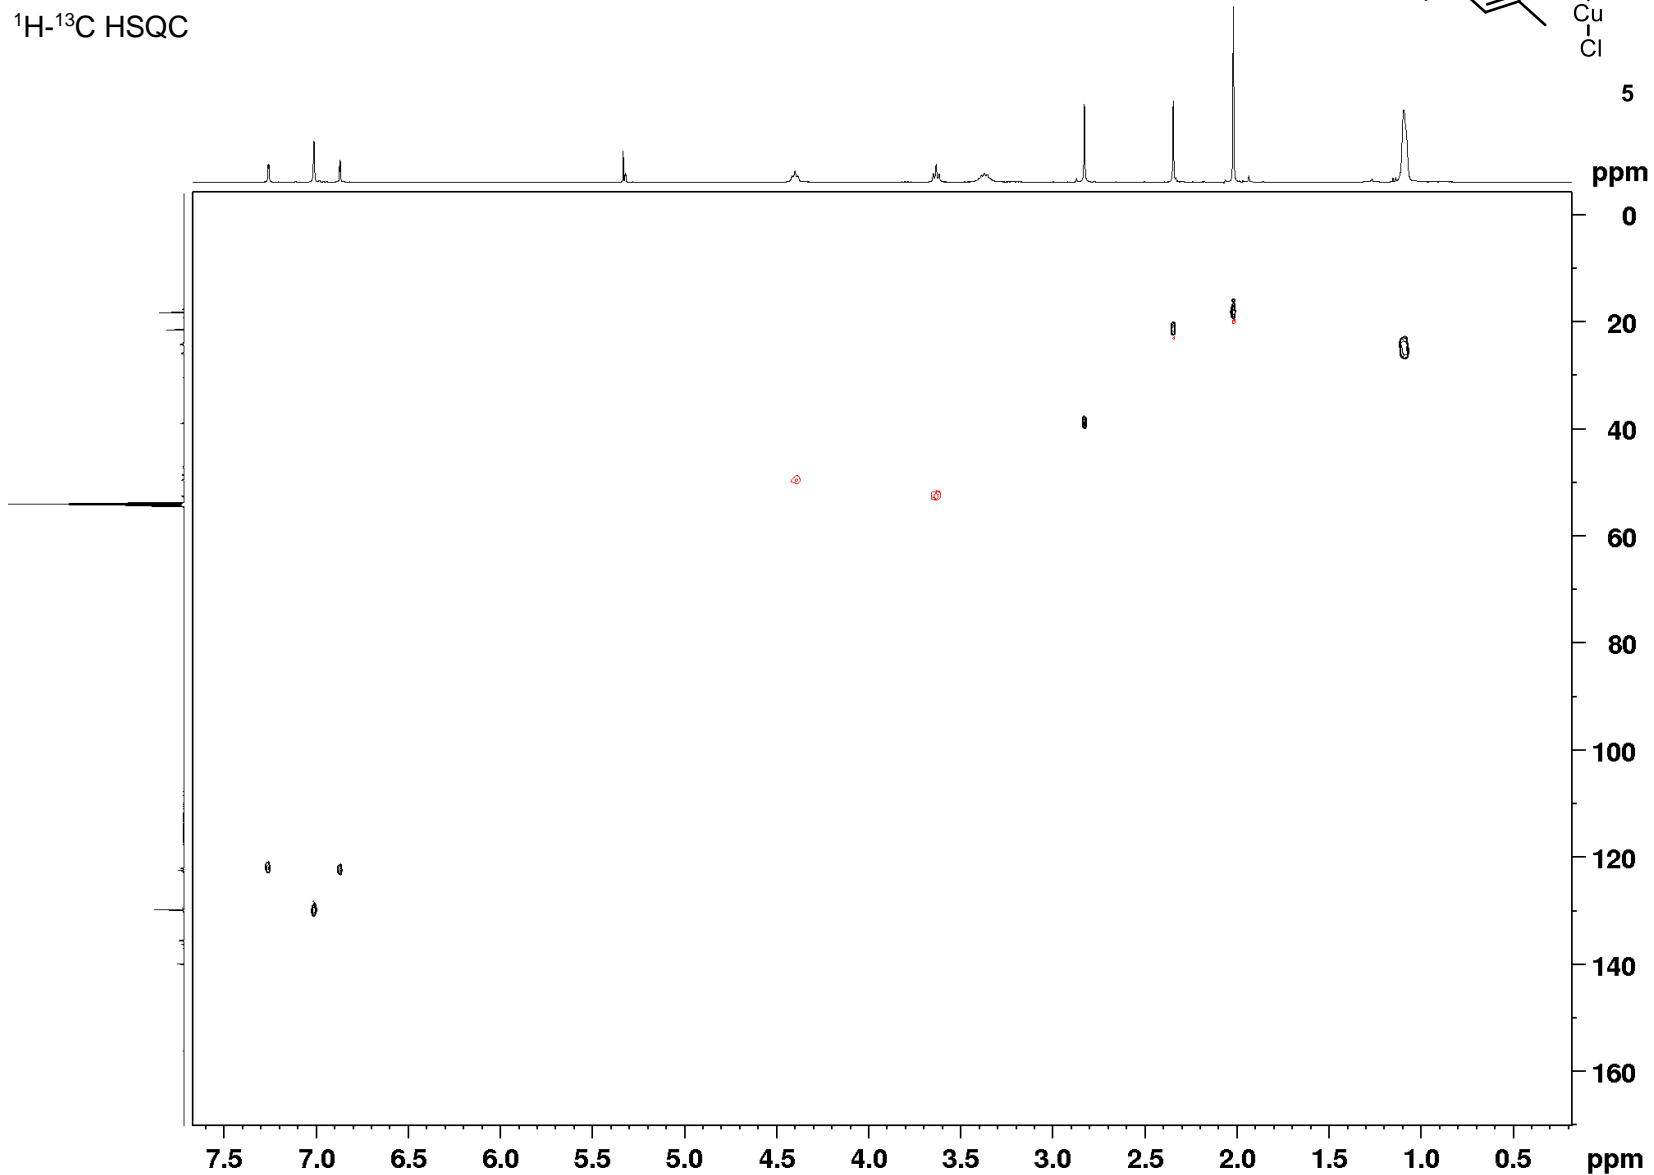

$^1\text{H}$ - $^{13}\text{C}$  HMBC

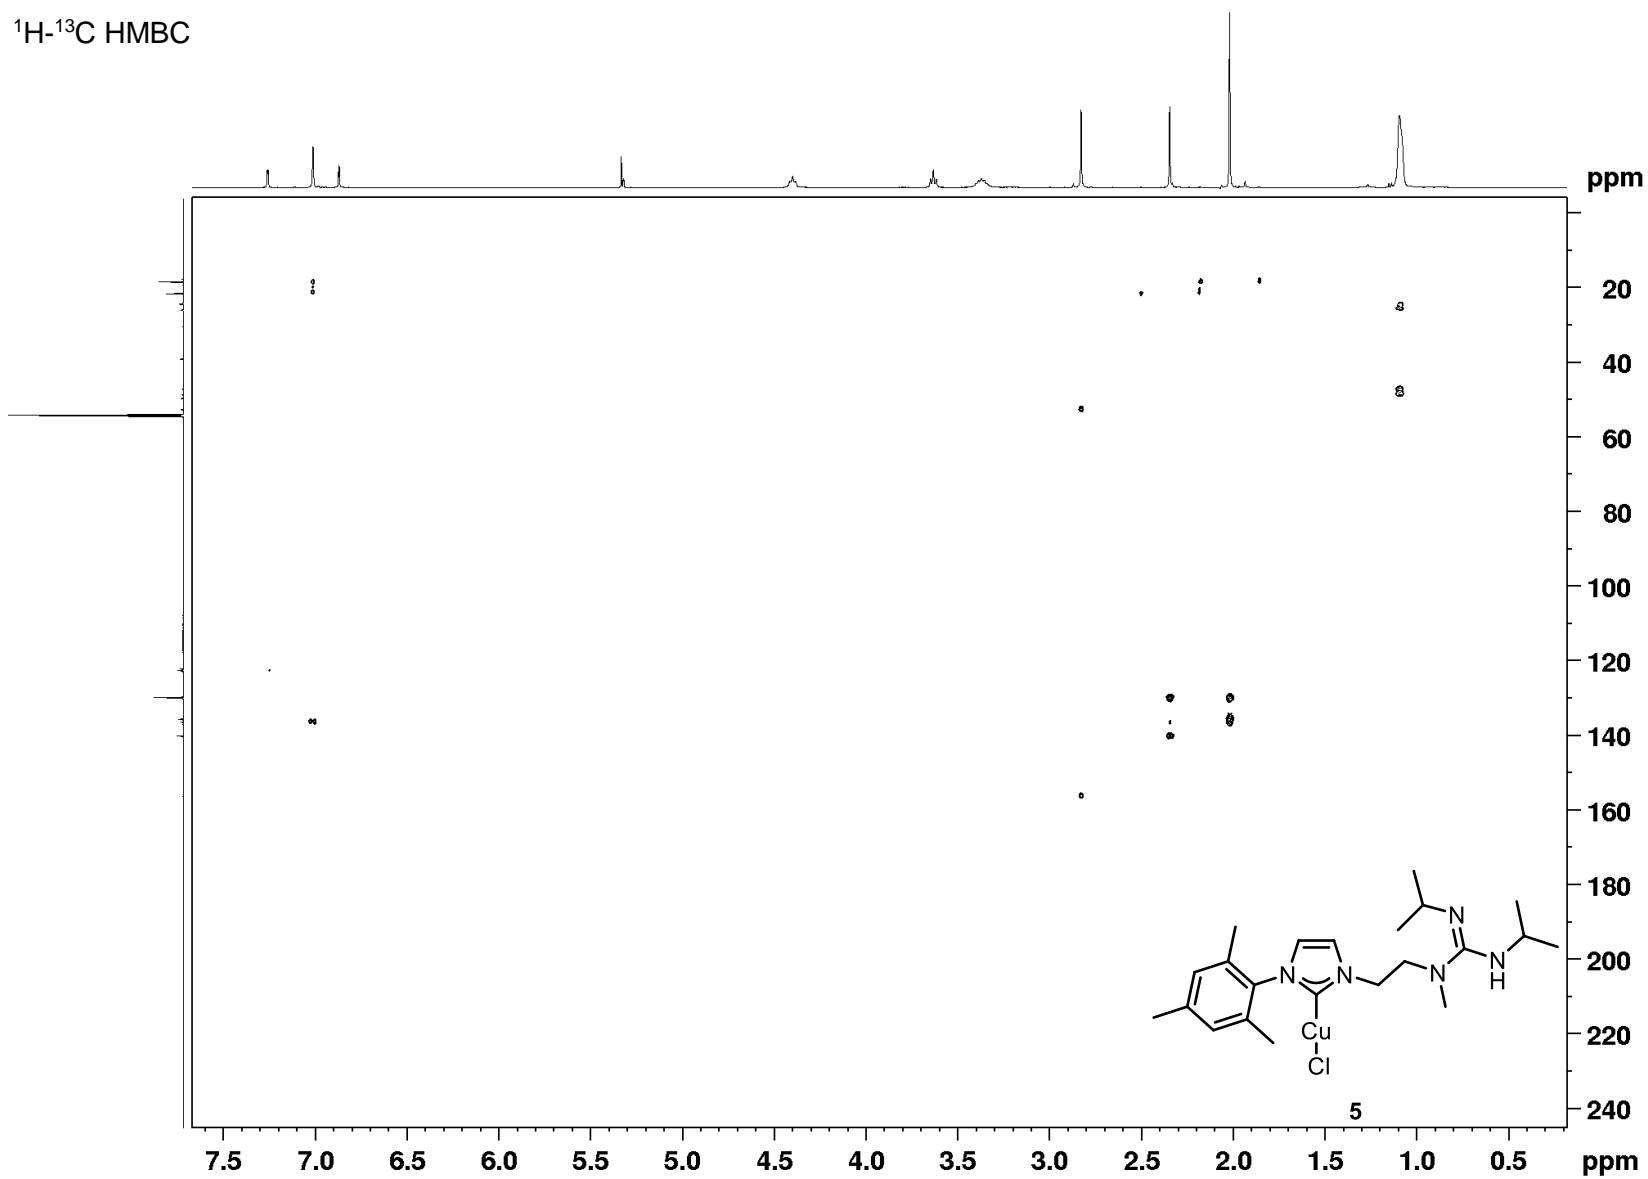

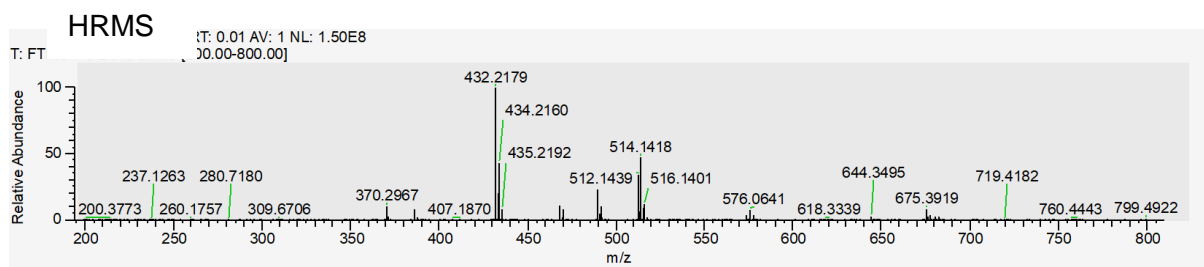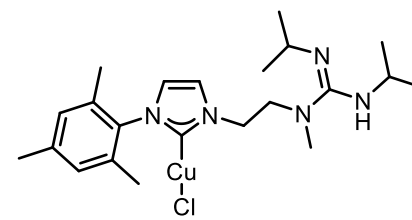



**(Z)-1,2-Diphenylethene (13)**

<sup>1</sup>H NMR

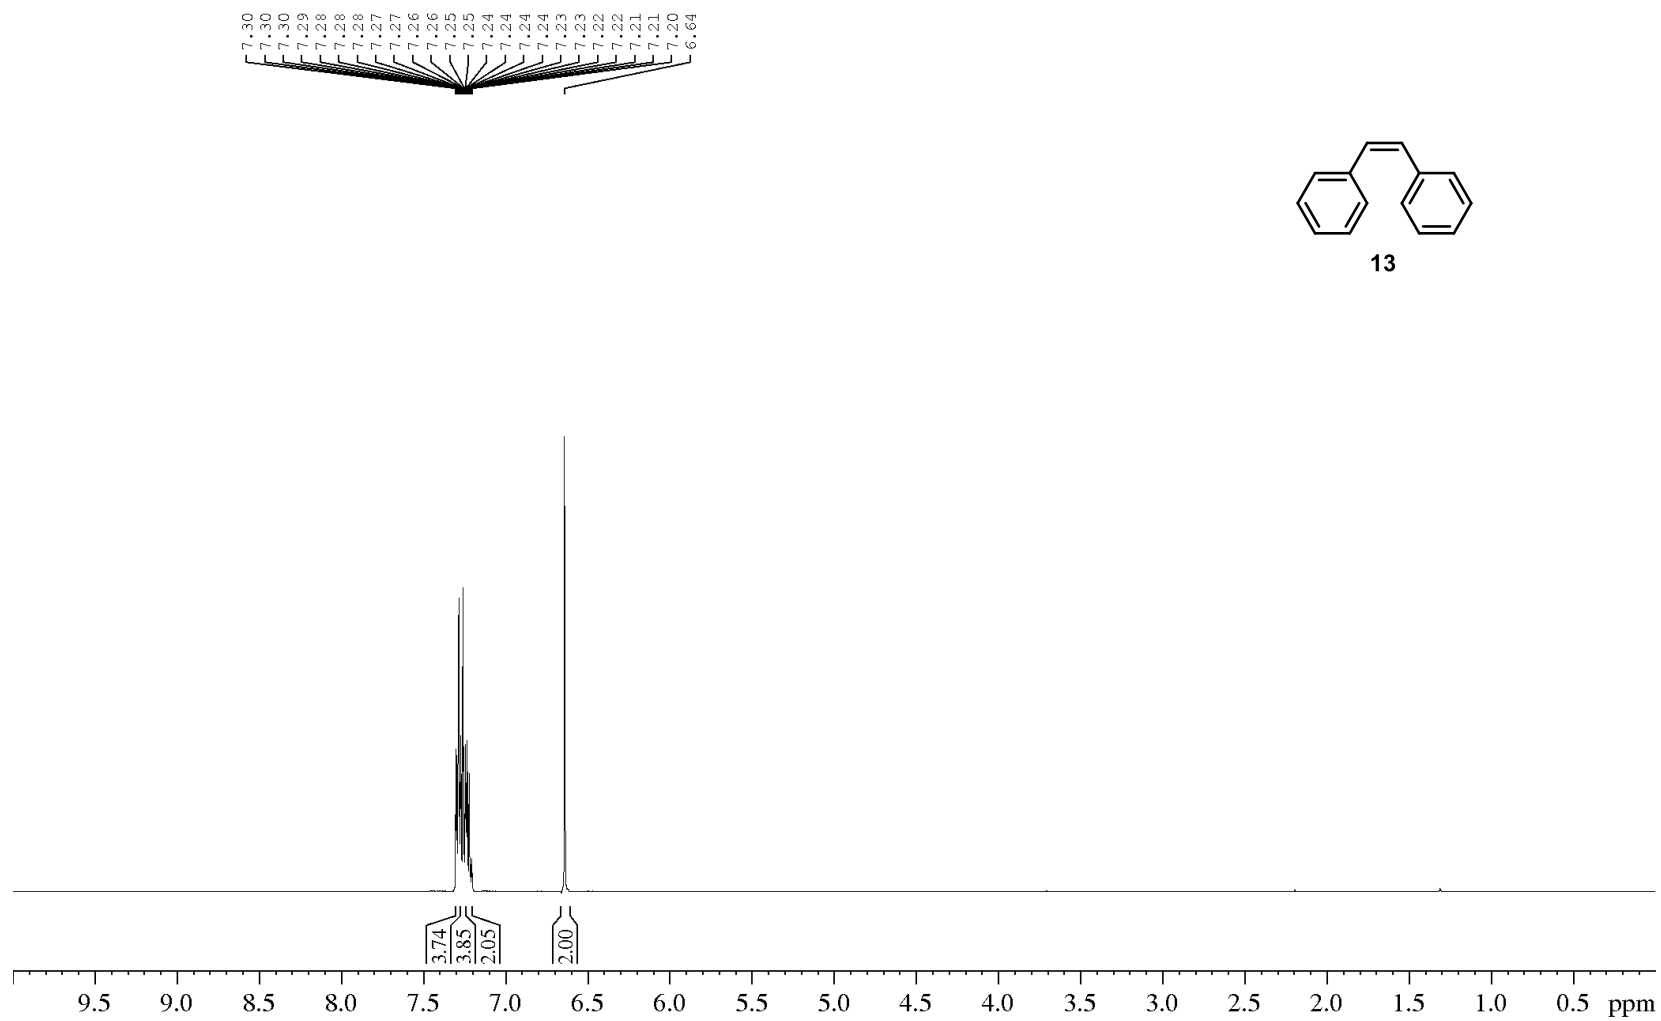

$^{13}\text{C}$  NMR

137.3  
130.3  
128.9  
128.2  
127.1

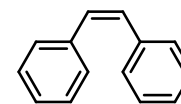

13

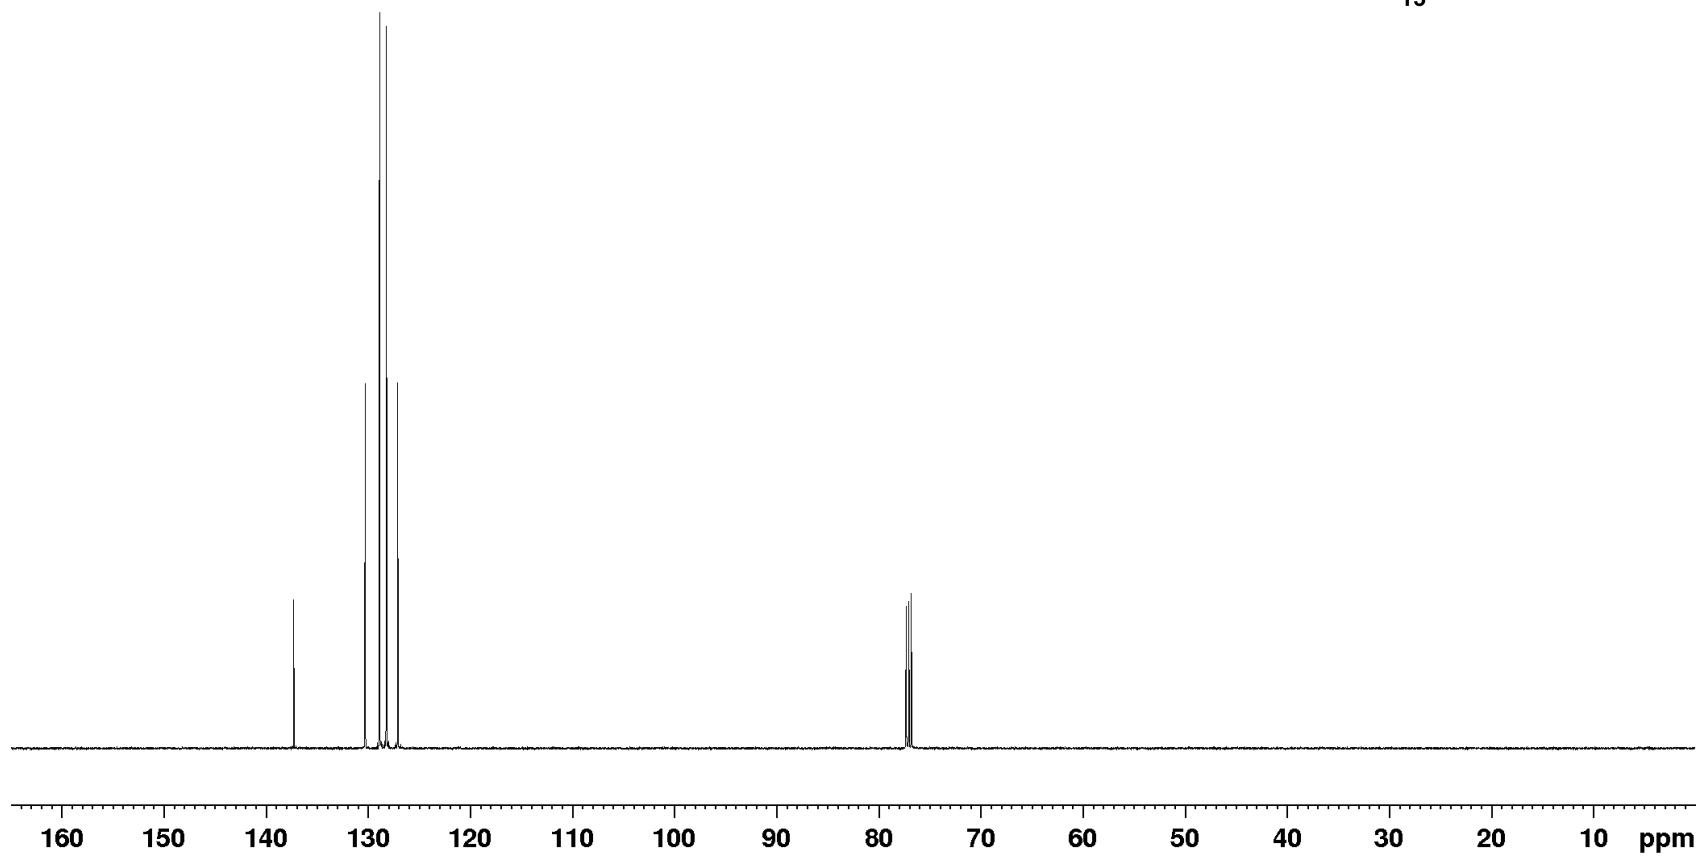

$^1\text{H}$ - $^1\text{H}$  COSY

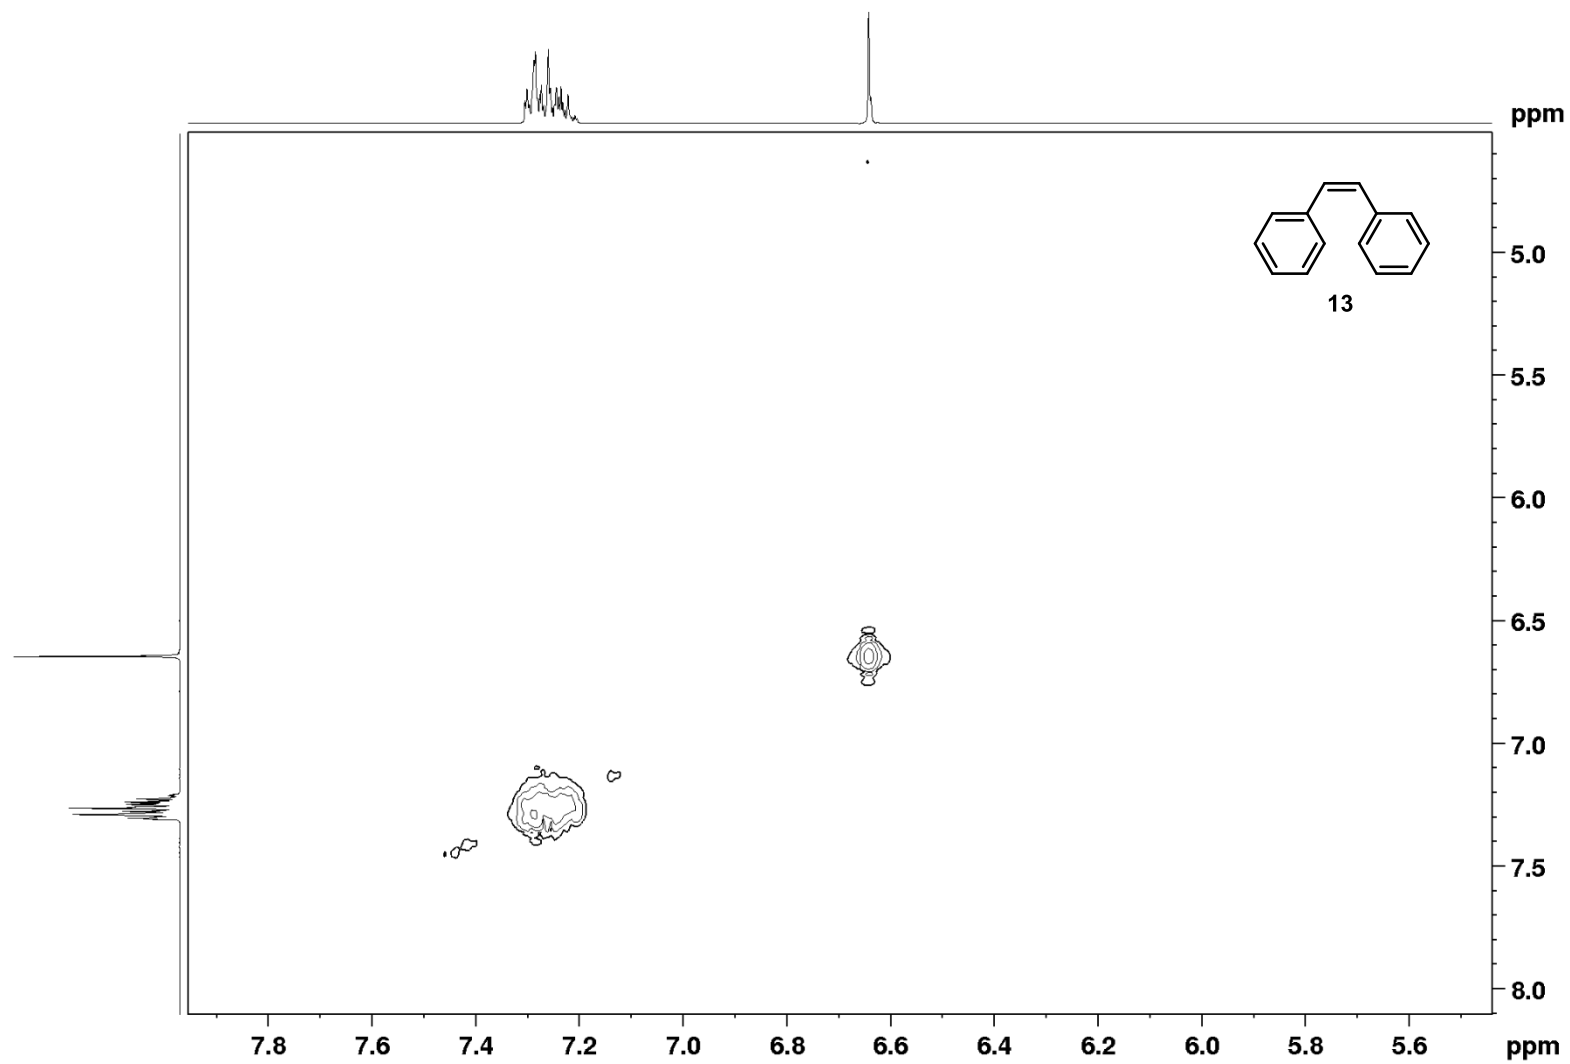

$^1\text{H}$ - $^{13}\text{C}$  HMBC

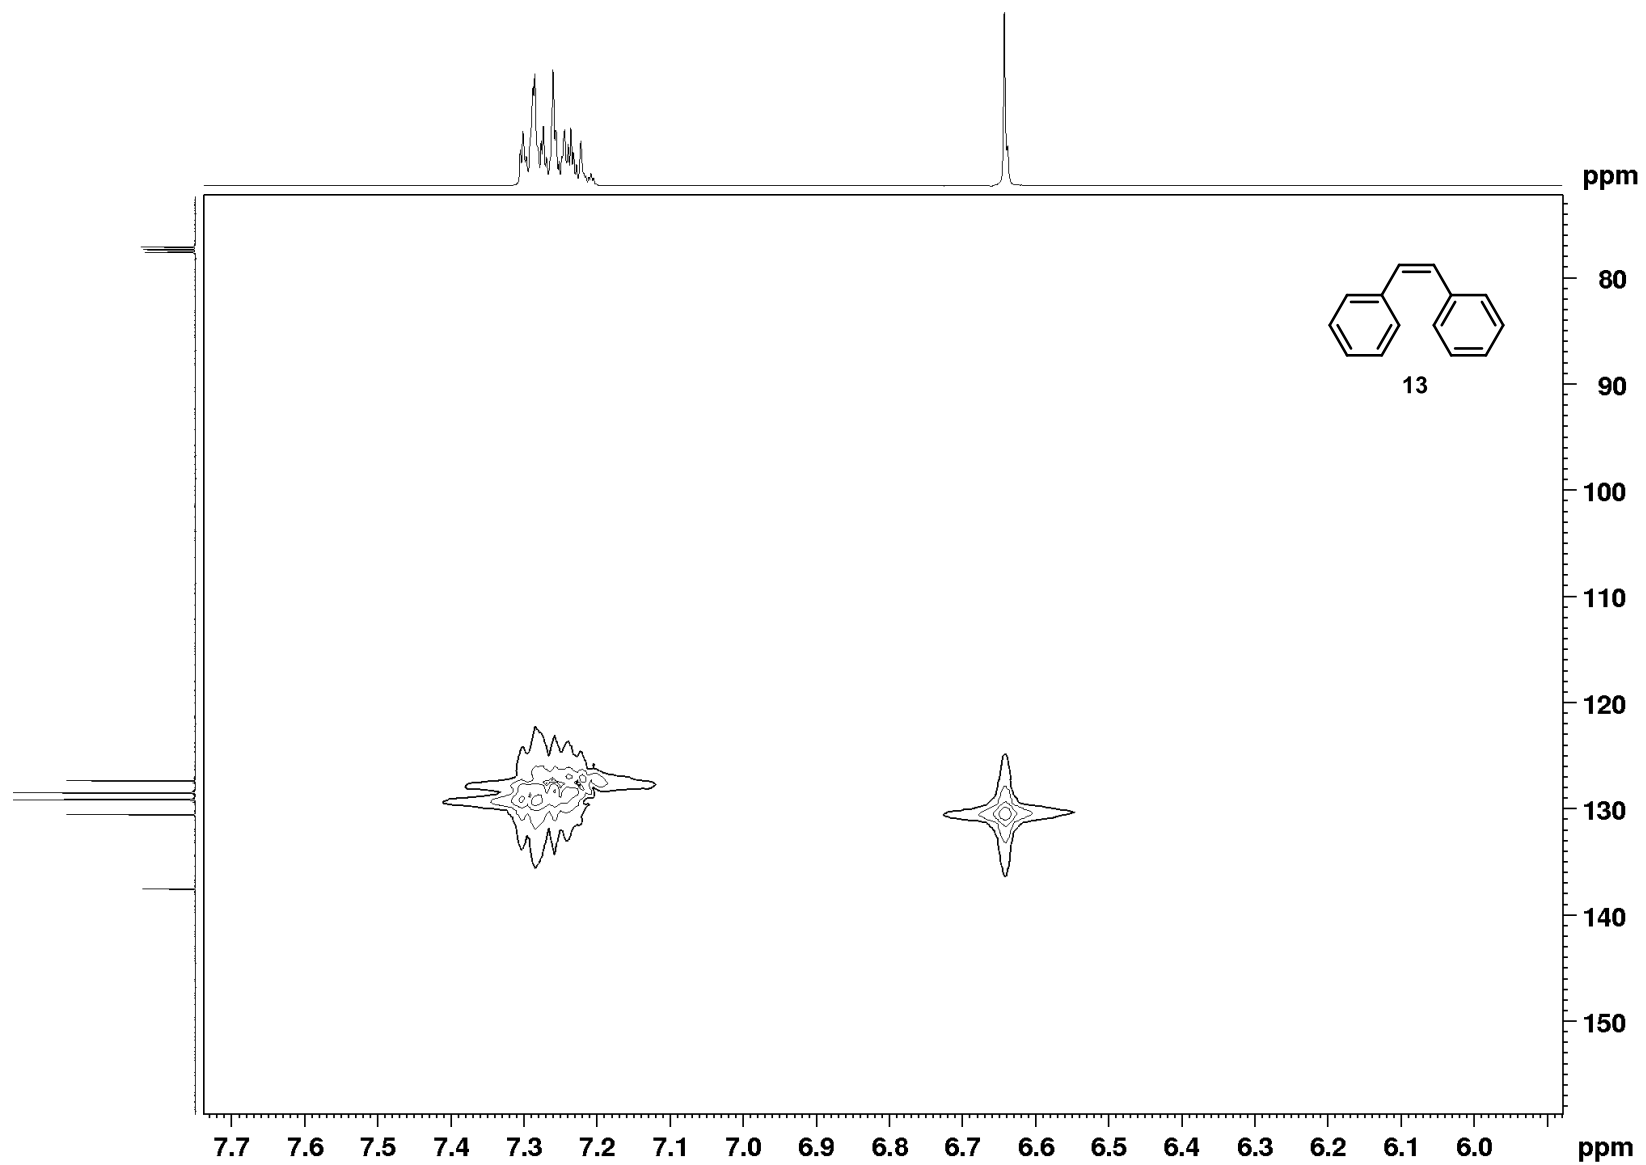

S28

$^1\text{H}$ - $^{13}\text{C}$  HSQC

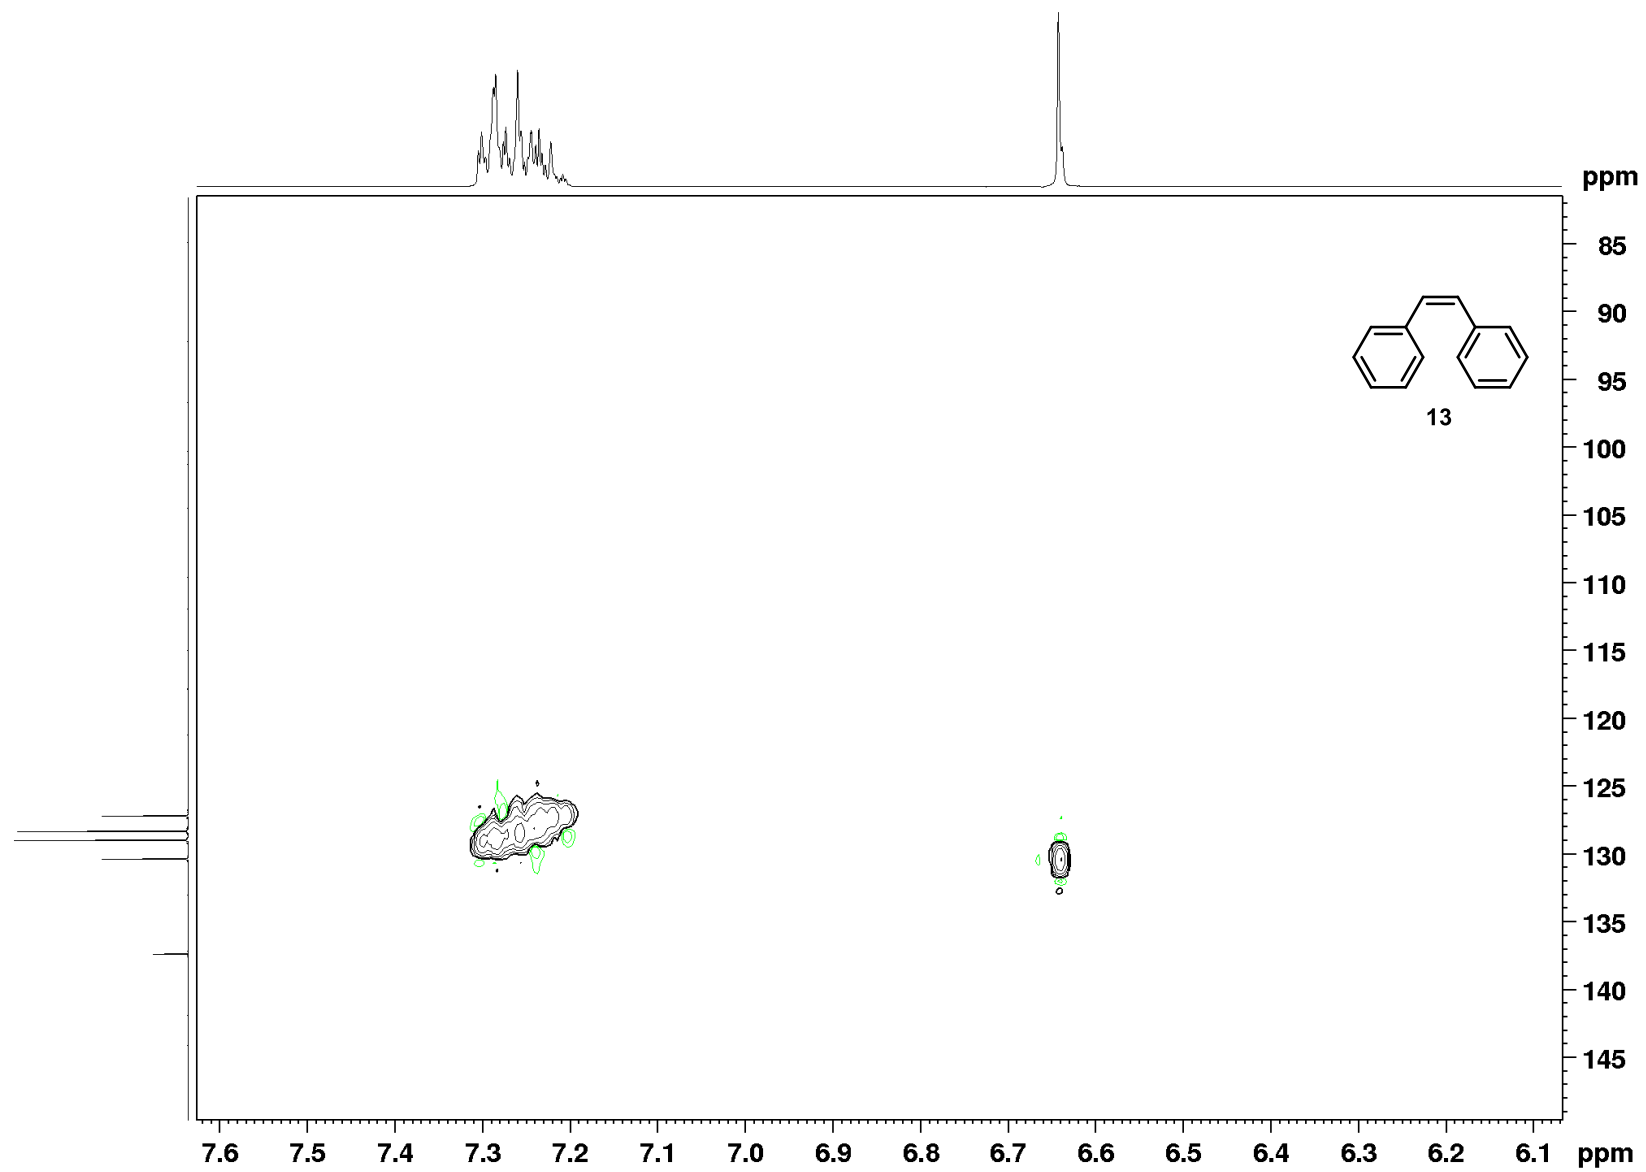

S29

# HRMS

C:\Users\hp\Do...Spritze (2).raw Injection 1 FTMS + c APCI ... [50.00-500.00] MS + spectrum 0.14

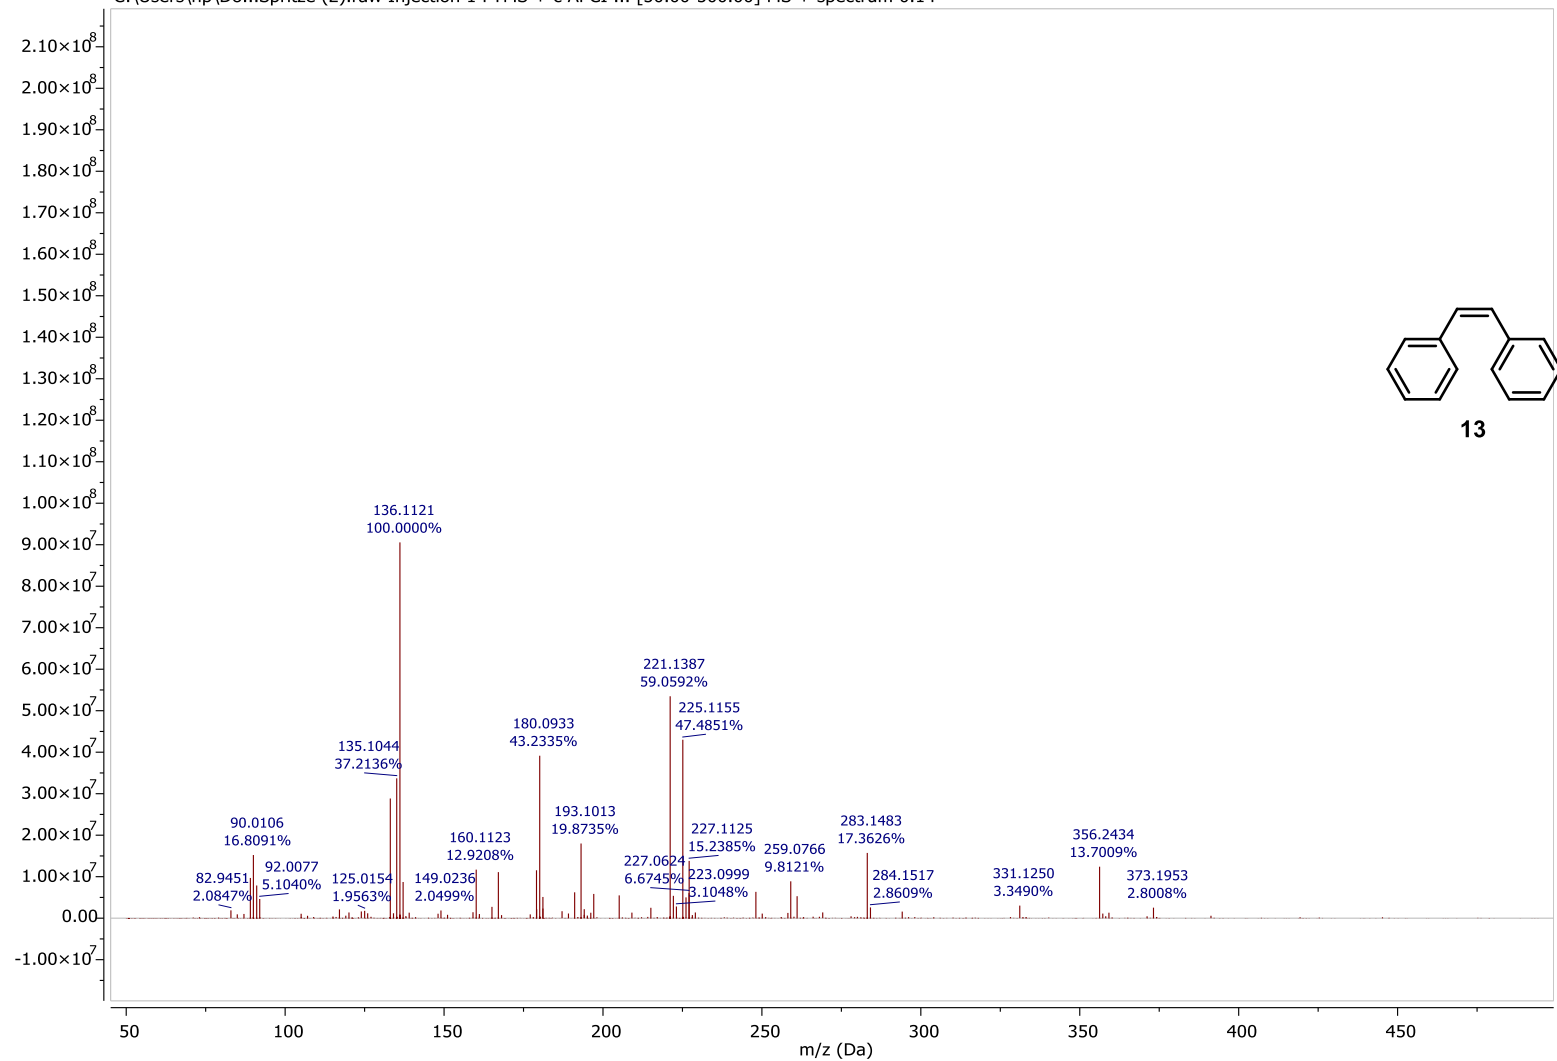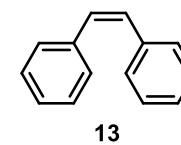

# 1-Phenylethan-1-ol (16)

<sup>1</sup>H NMR

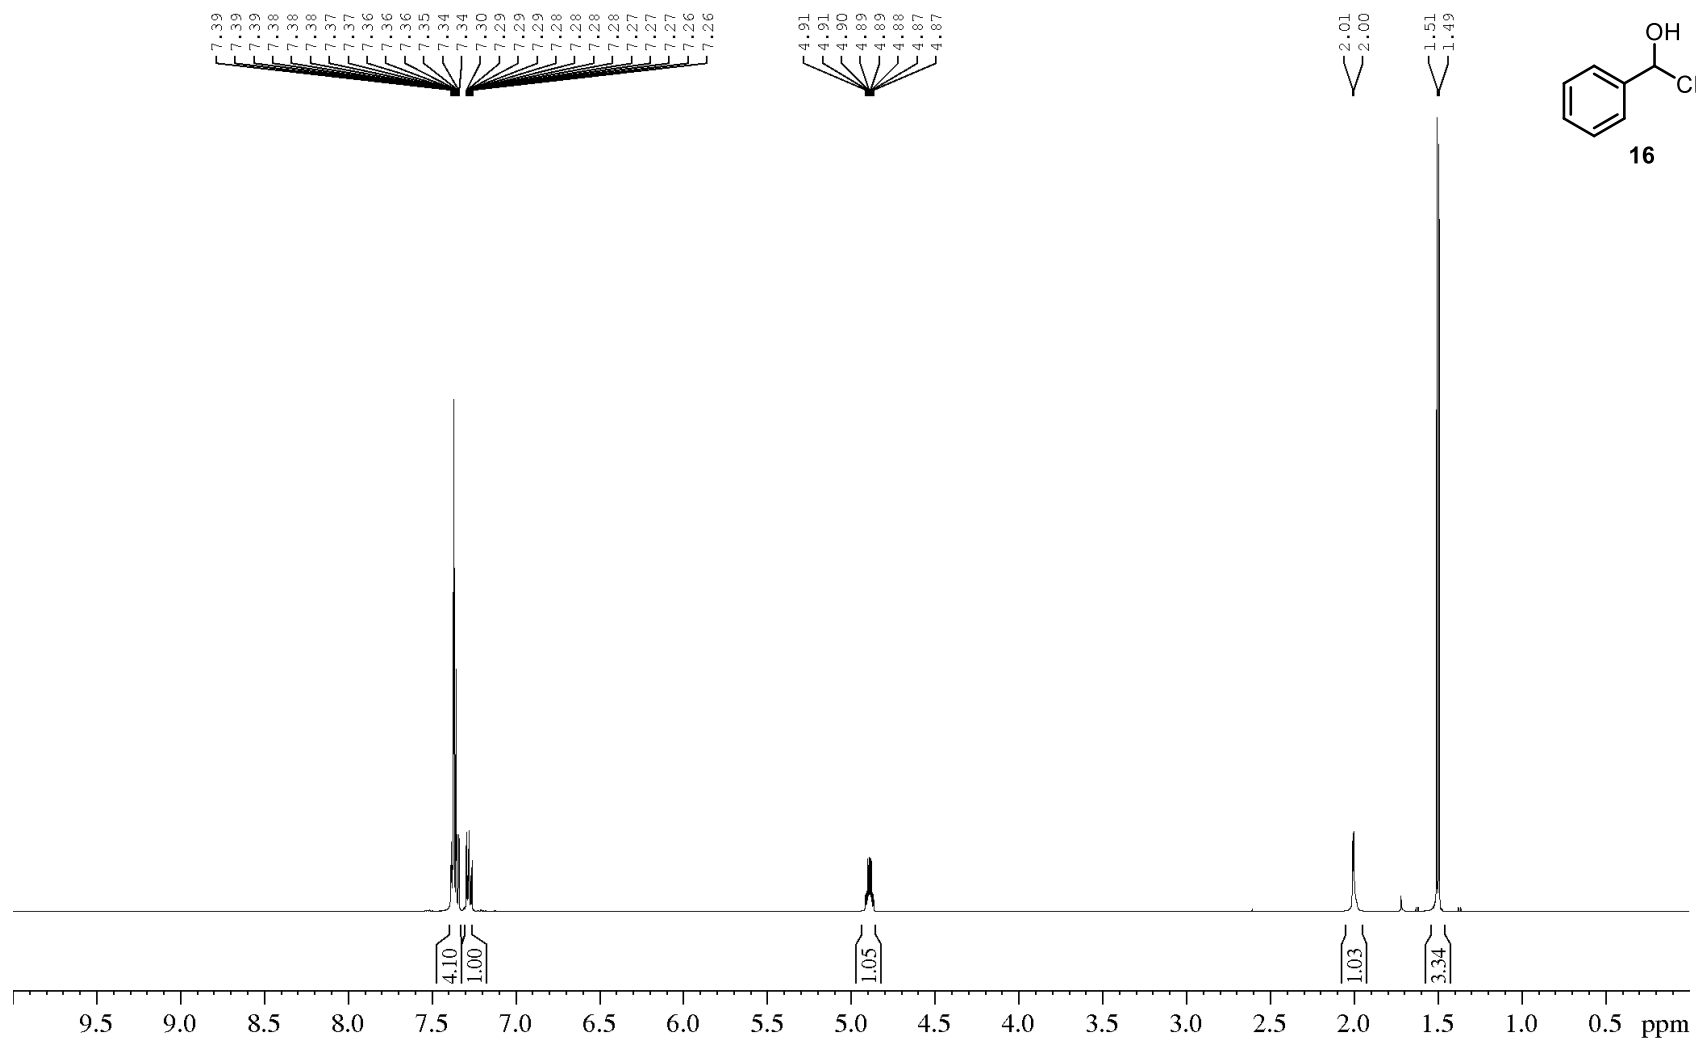

<sup>13</sup>C NMR

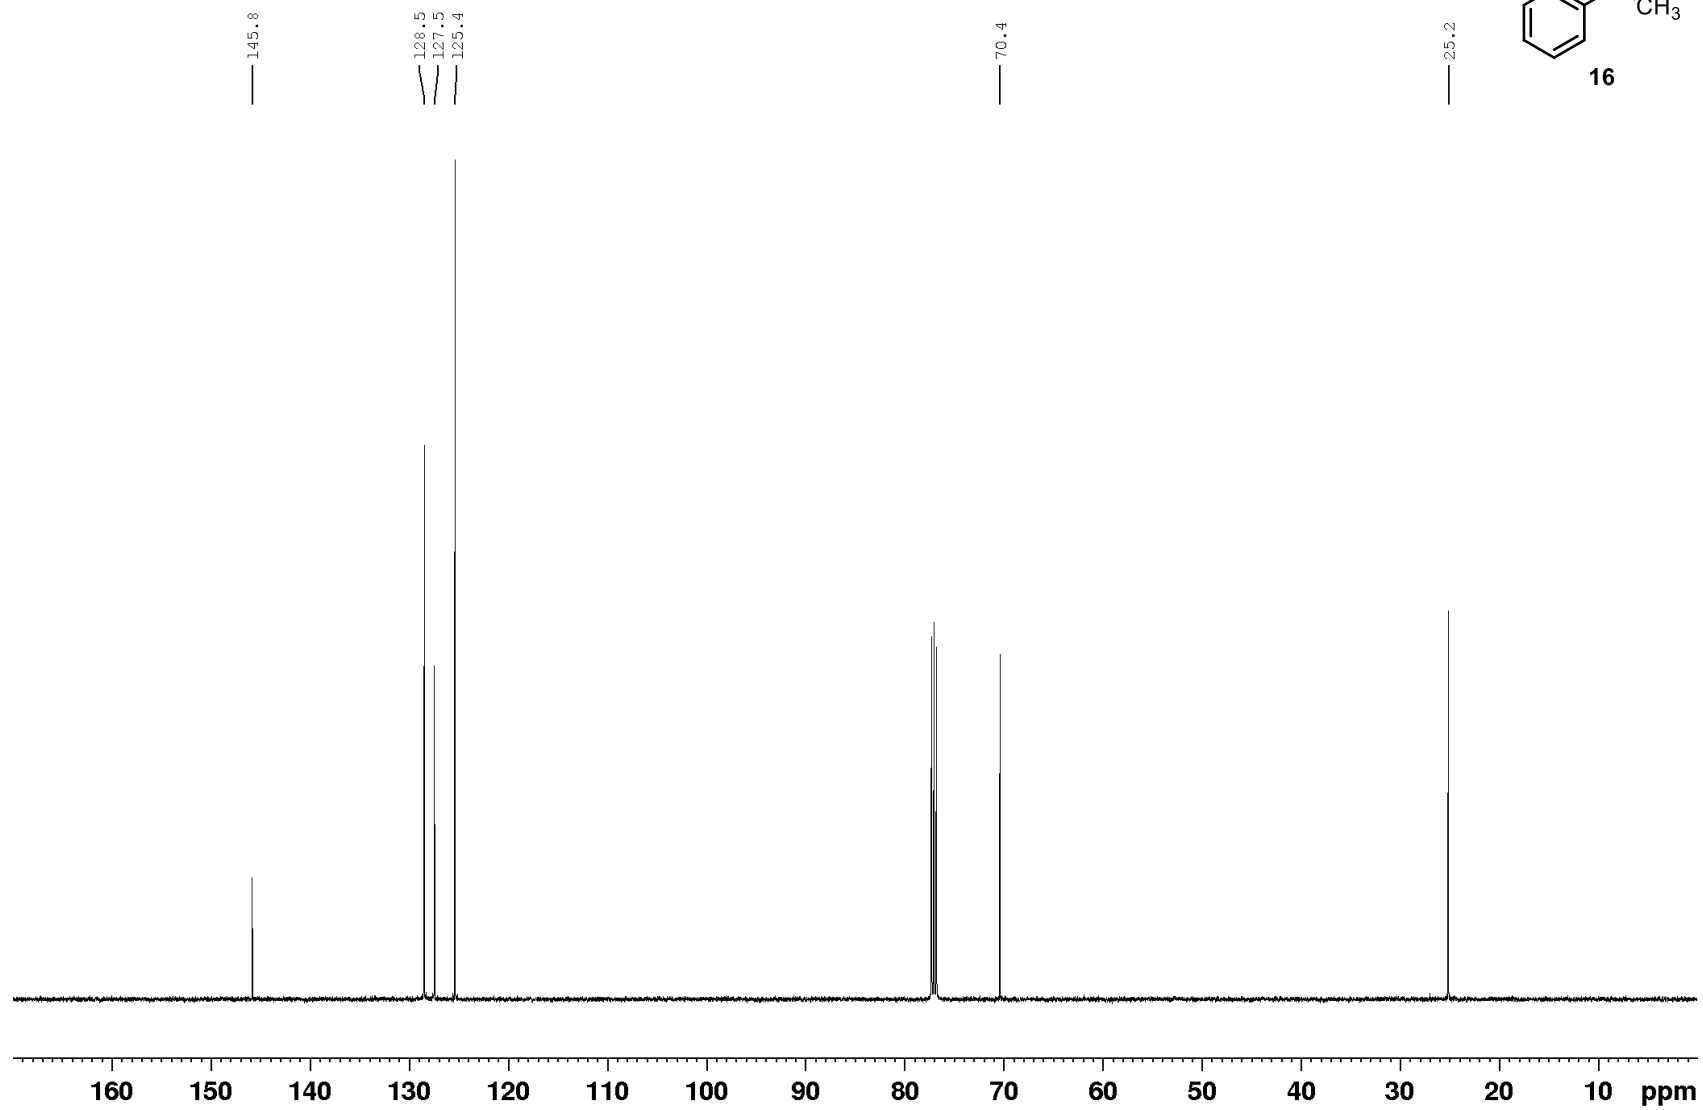



<sup>1</sup>H-<sup>1</sup>H COSY

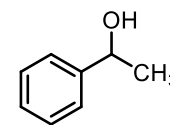

16

ppm

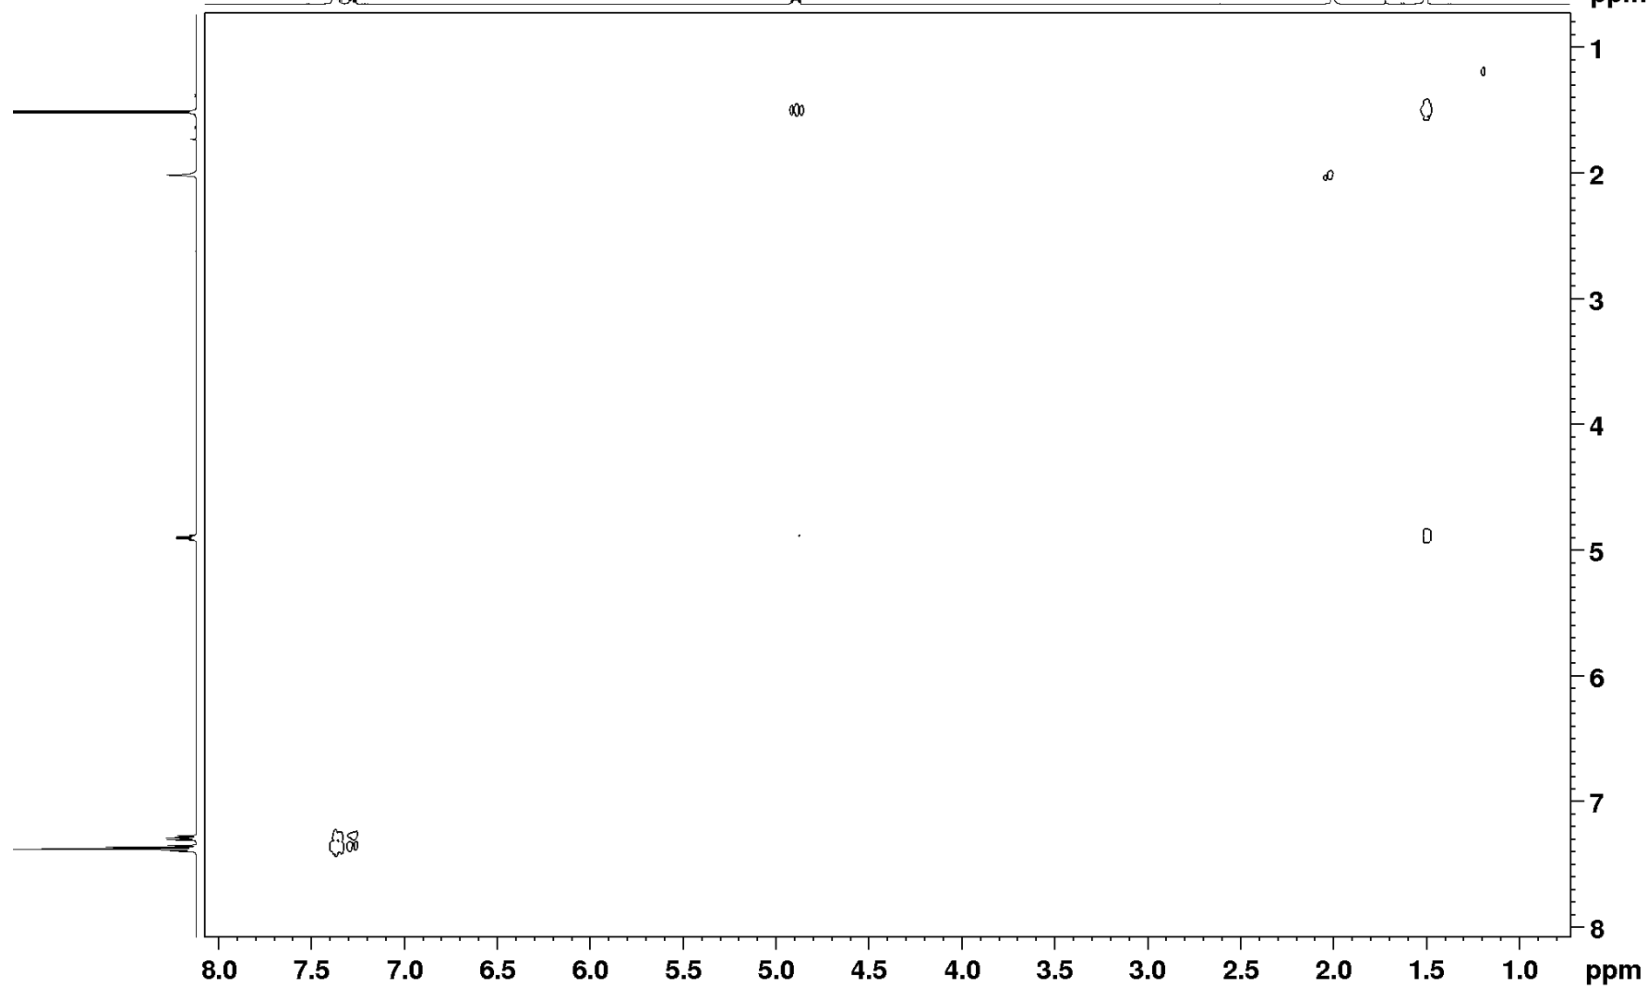

S33

$^1\text{H}$ - $^{13}\text{C}$  HMBC

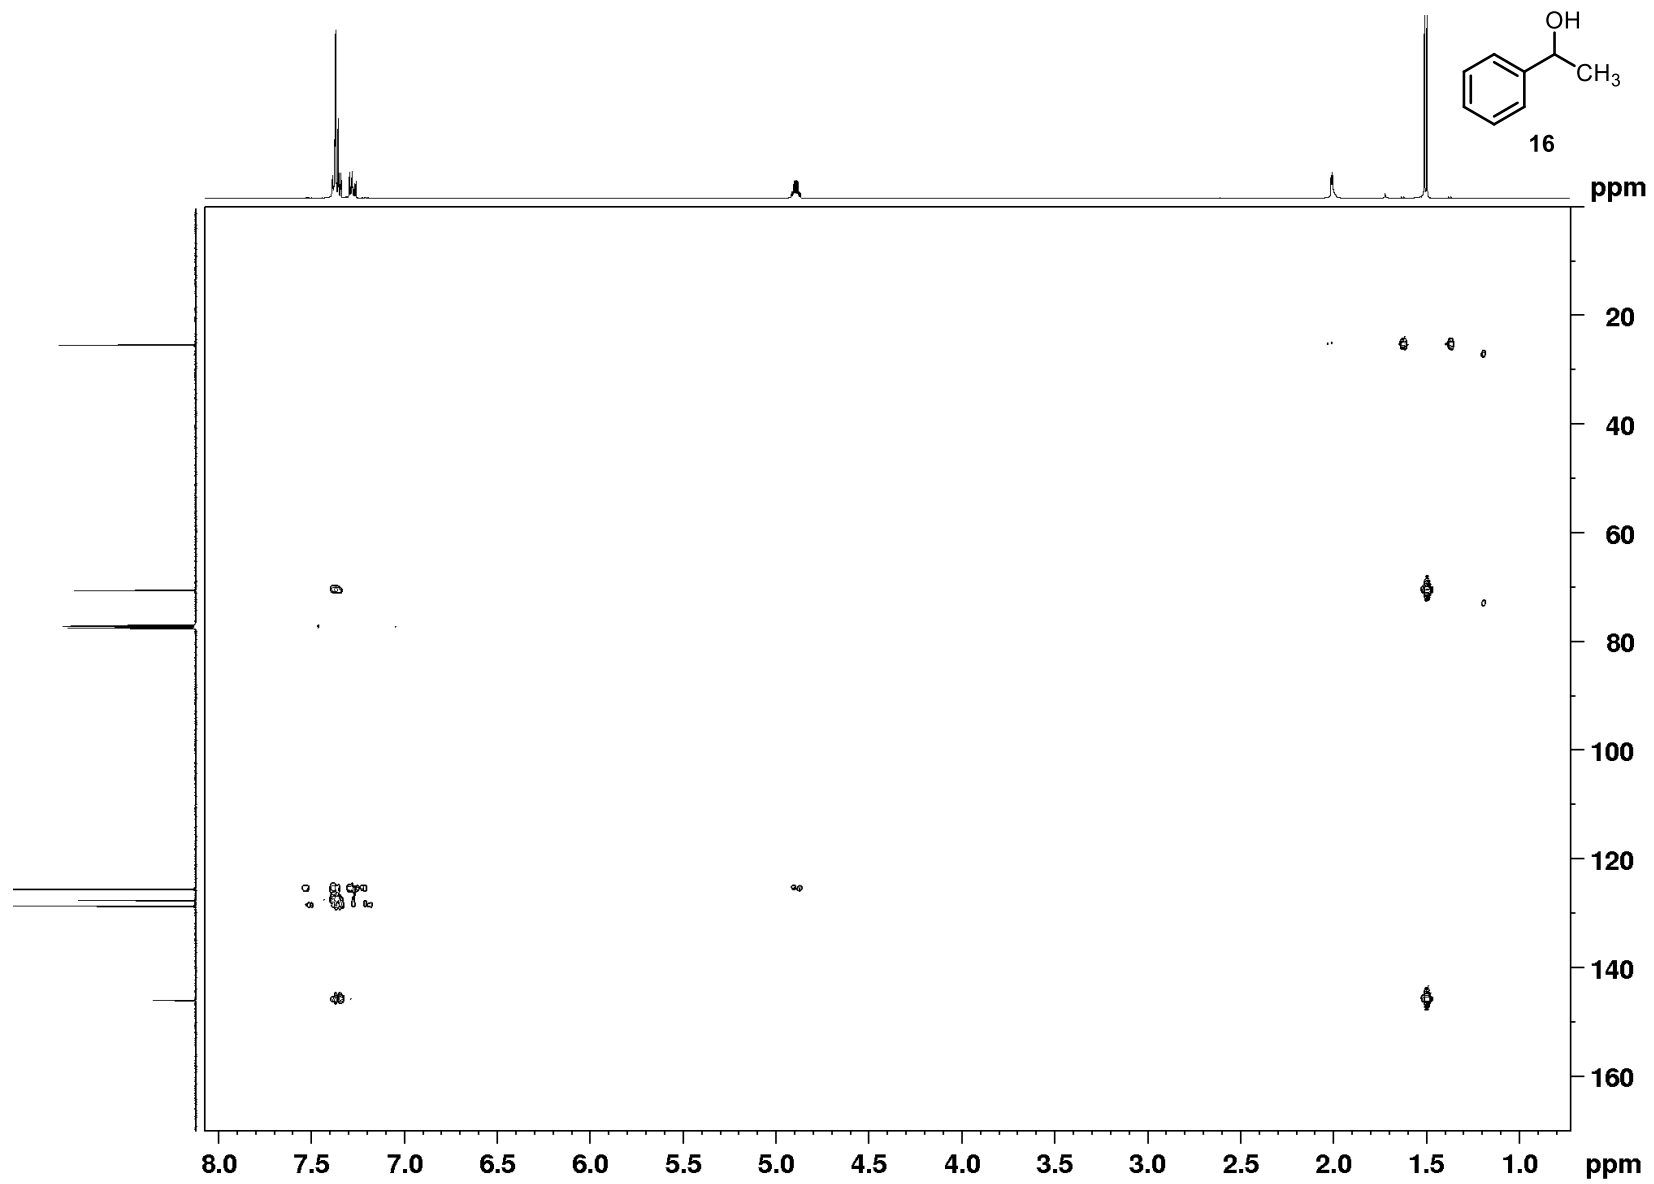

$^1\text{H}$ - $^{13}\text{C}$  HSQC

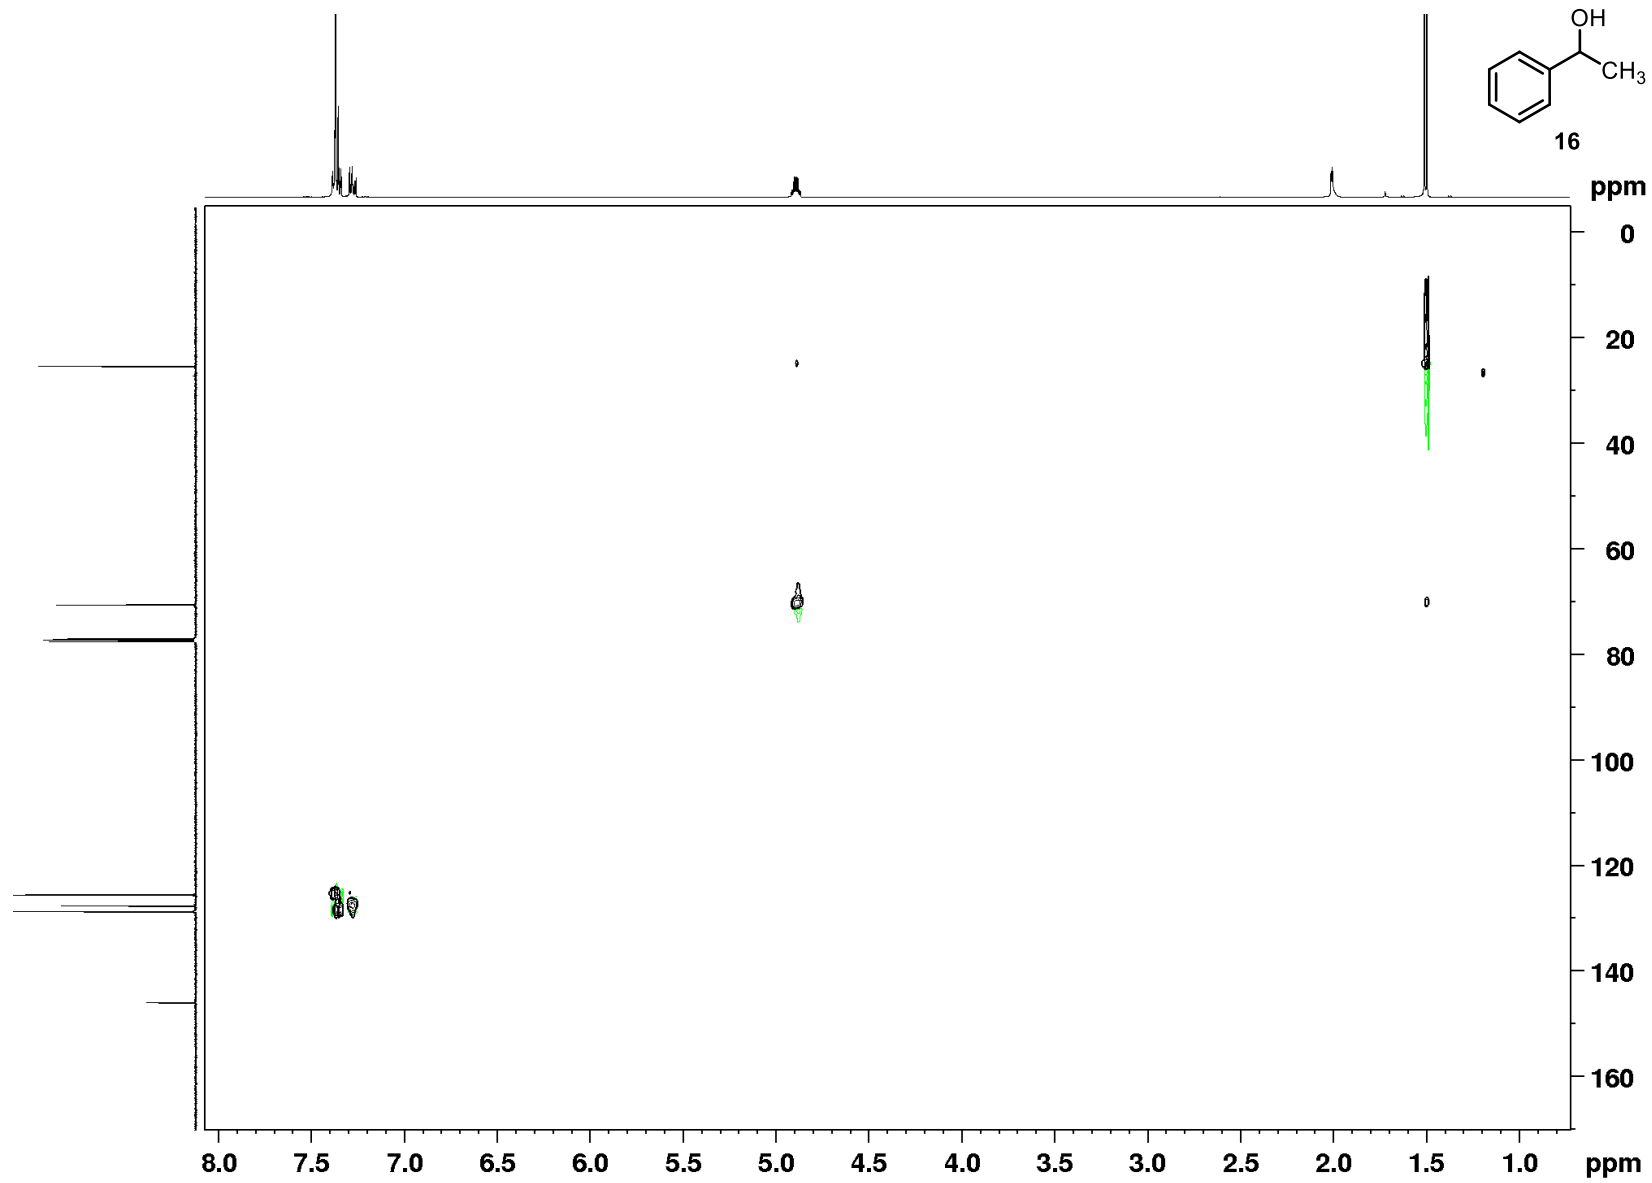

S35

# HRMS

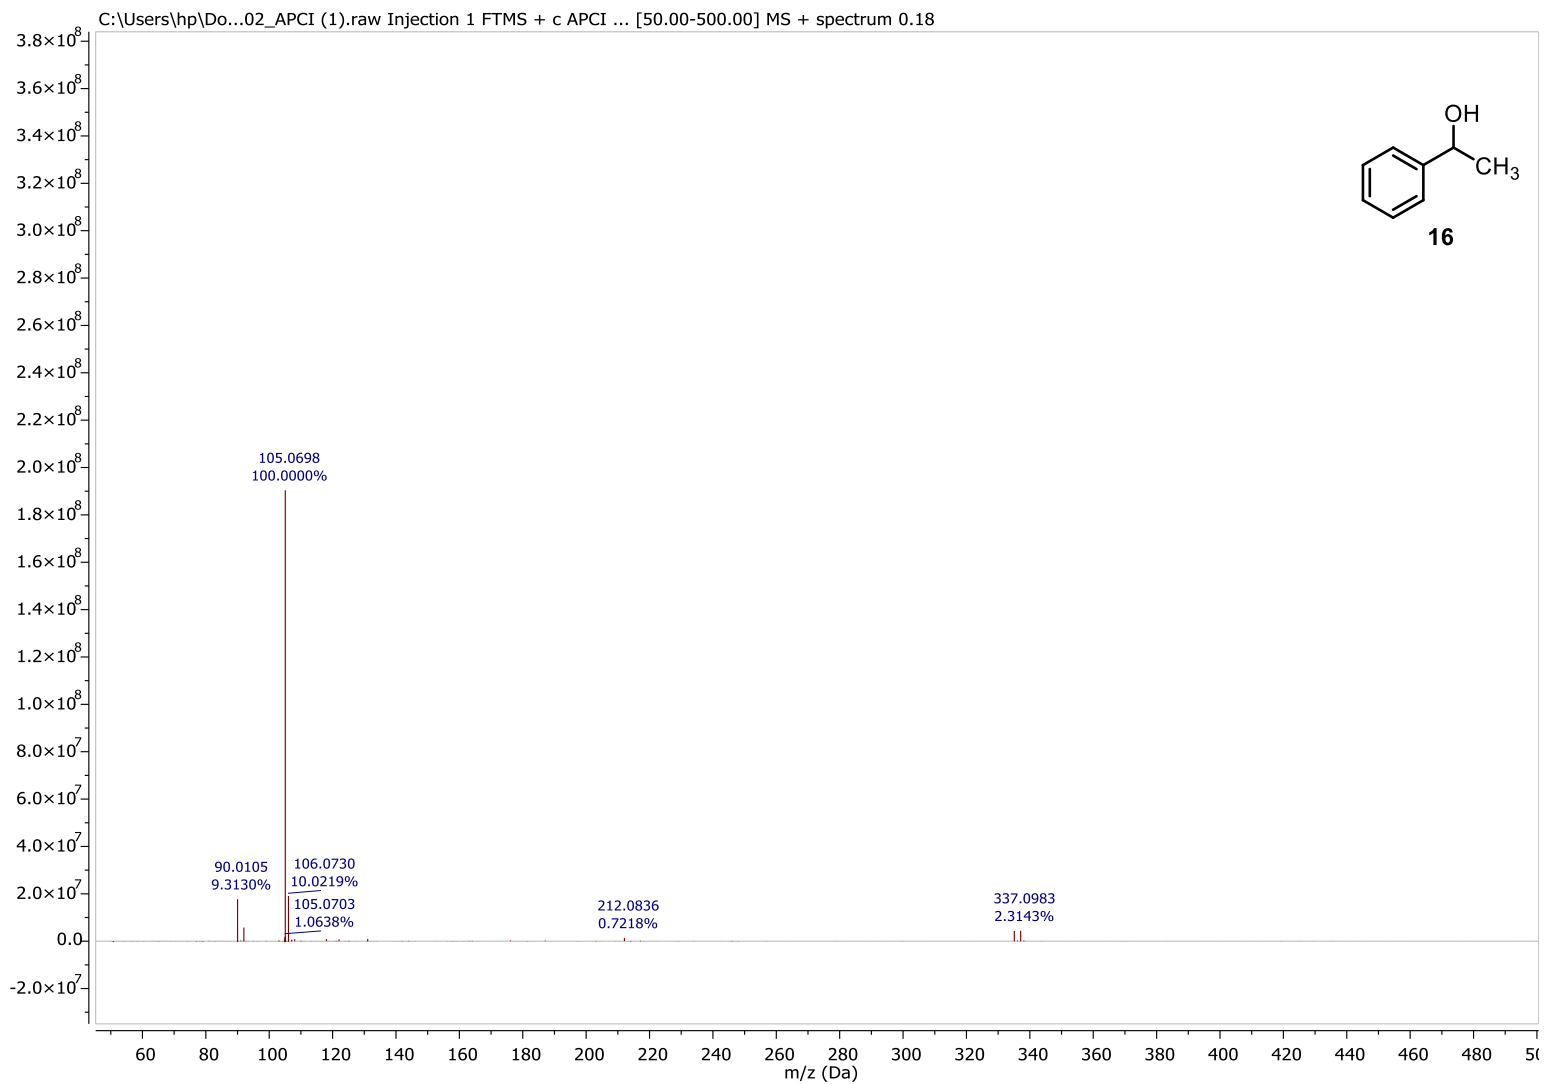

# Benzyl alcohol (9)

<sup>1</sup>H NMR

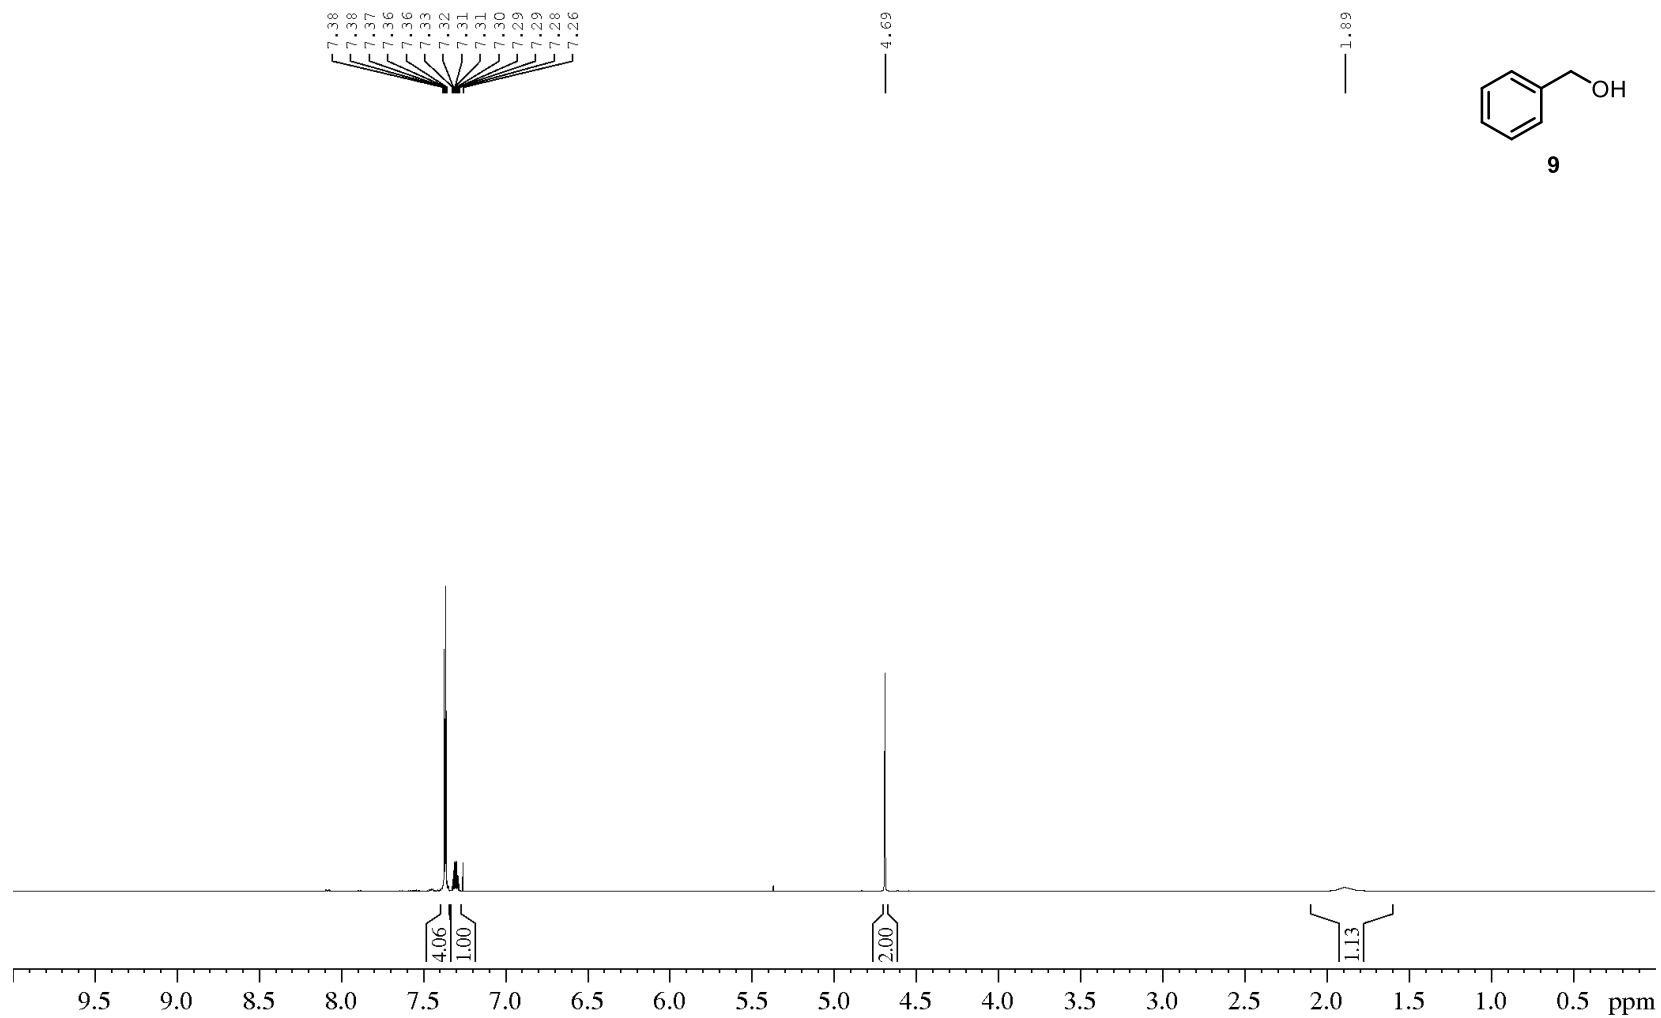

$^{13}\text{C}$  NMR

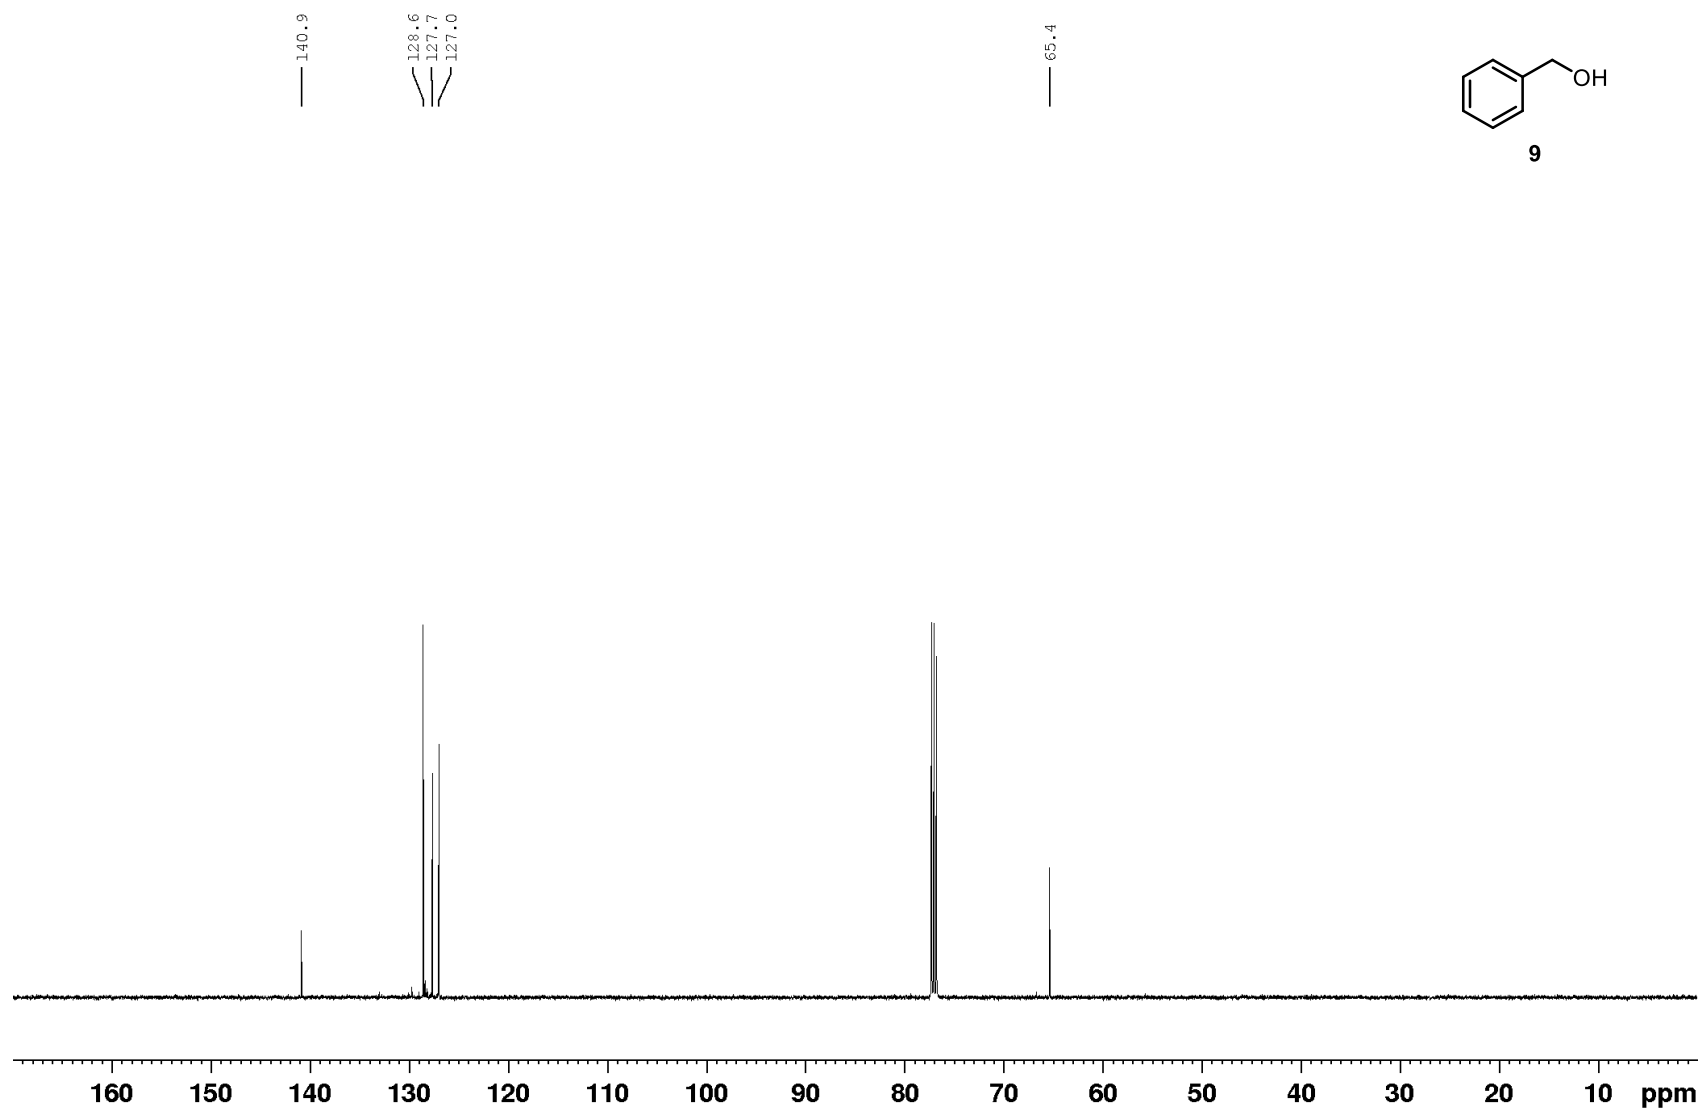

$^1\text{H}$ - $^1\text{H}$  COSY

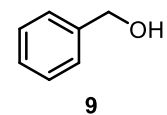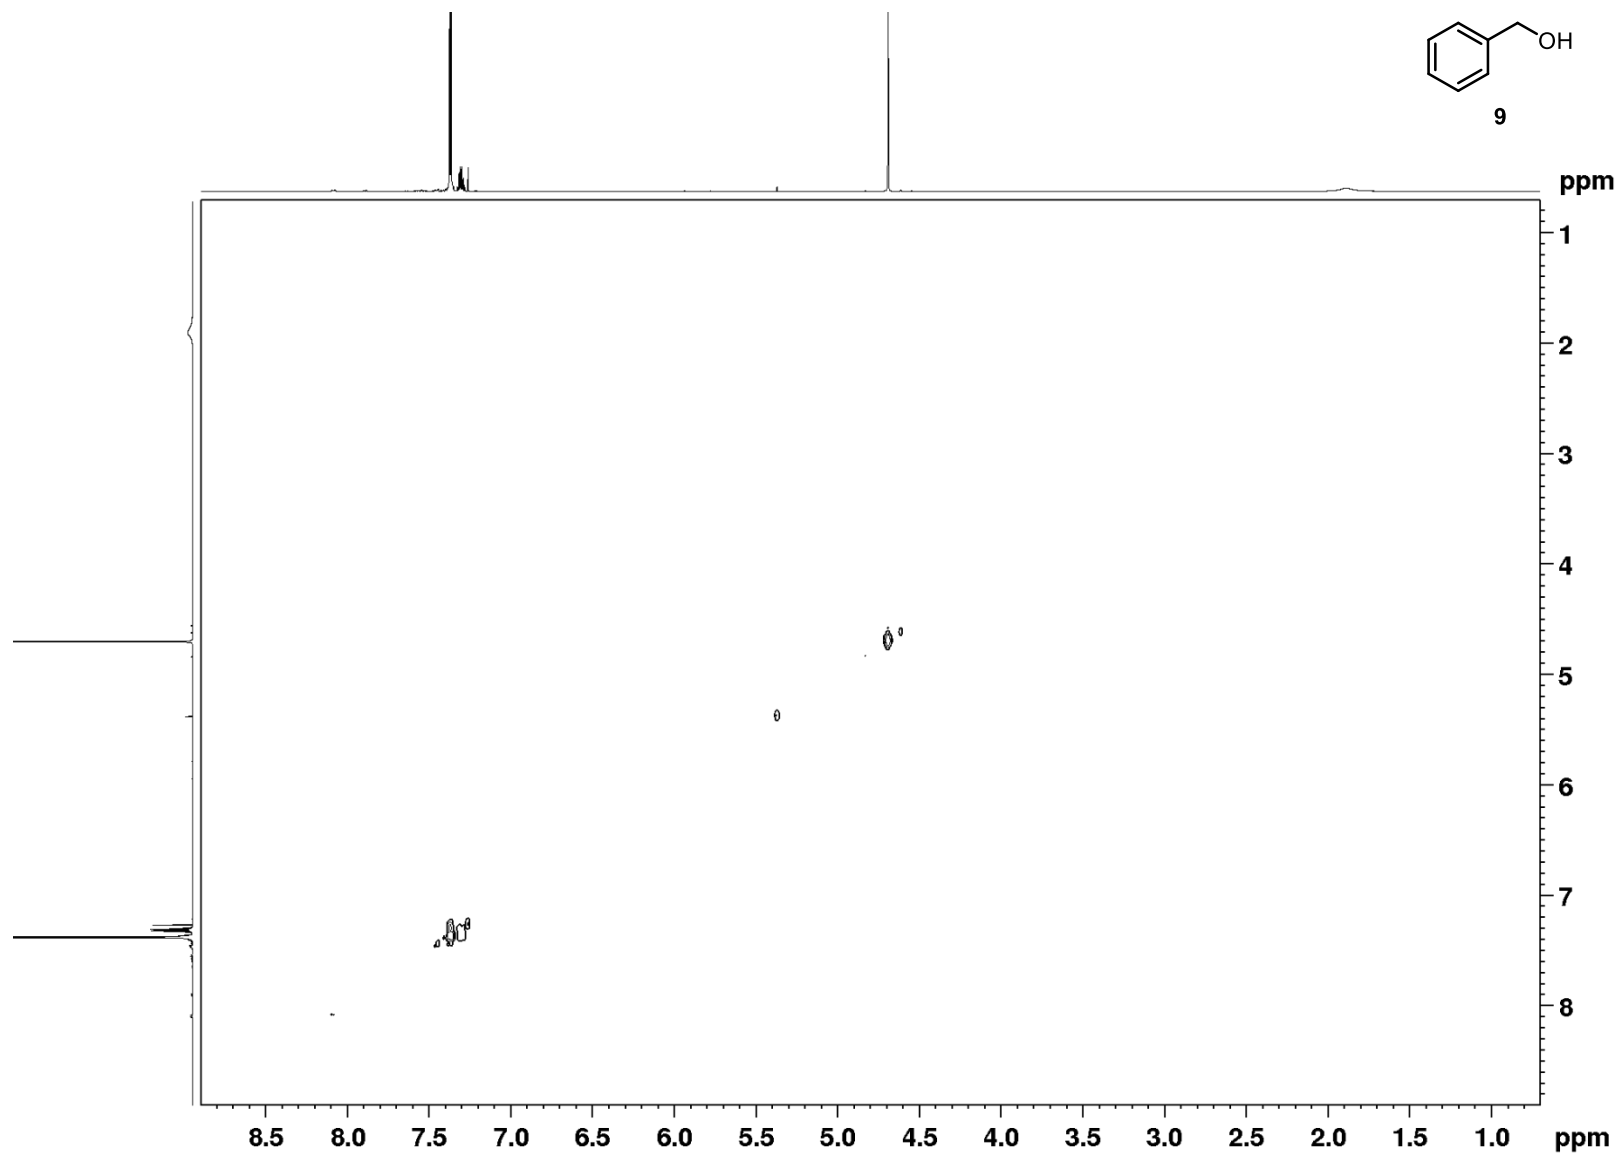

S39

$^1\text{H}$ - $^{13}\text{C}$  HMBC

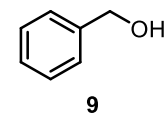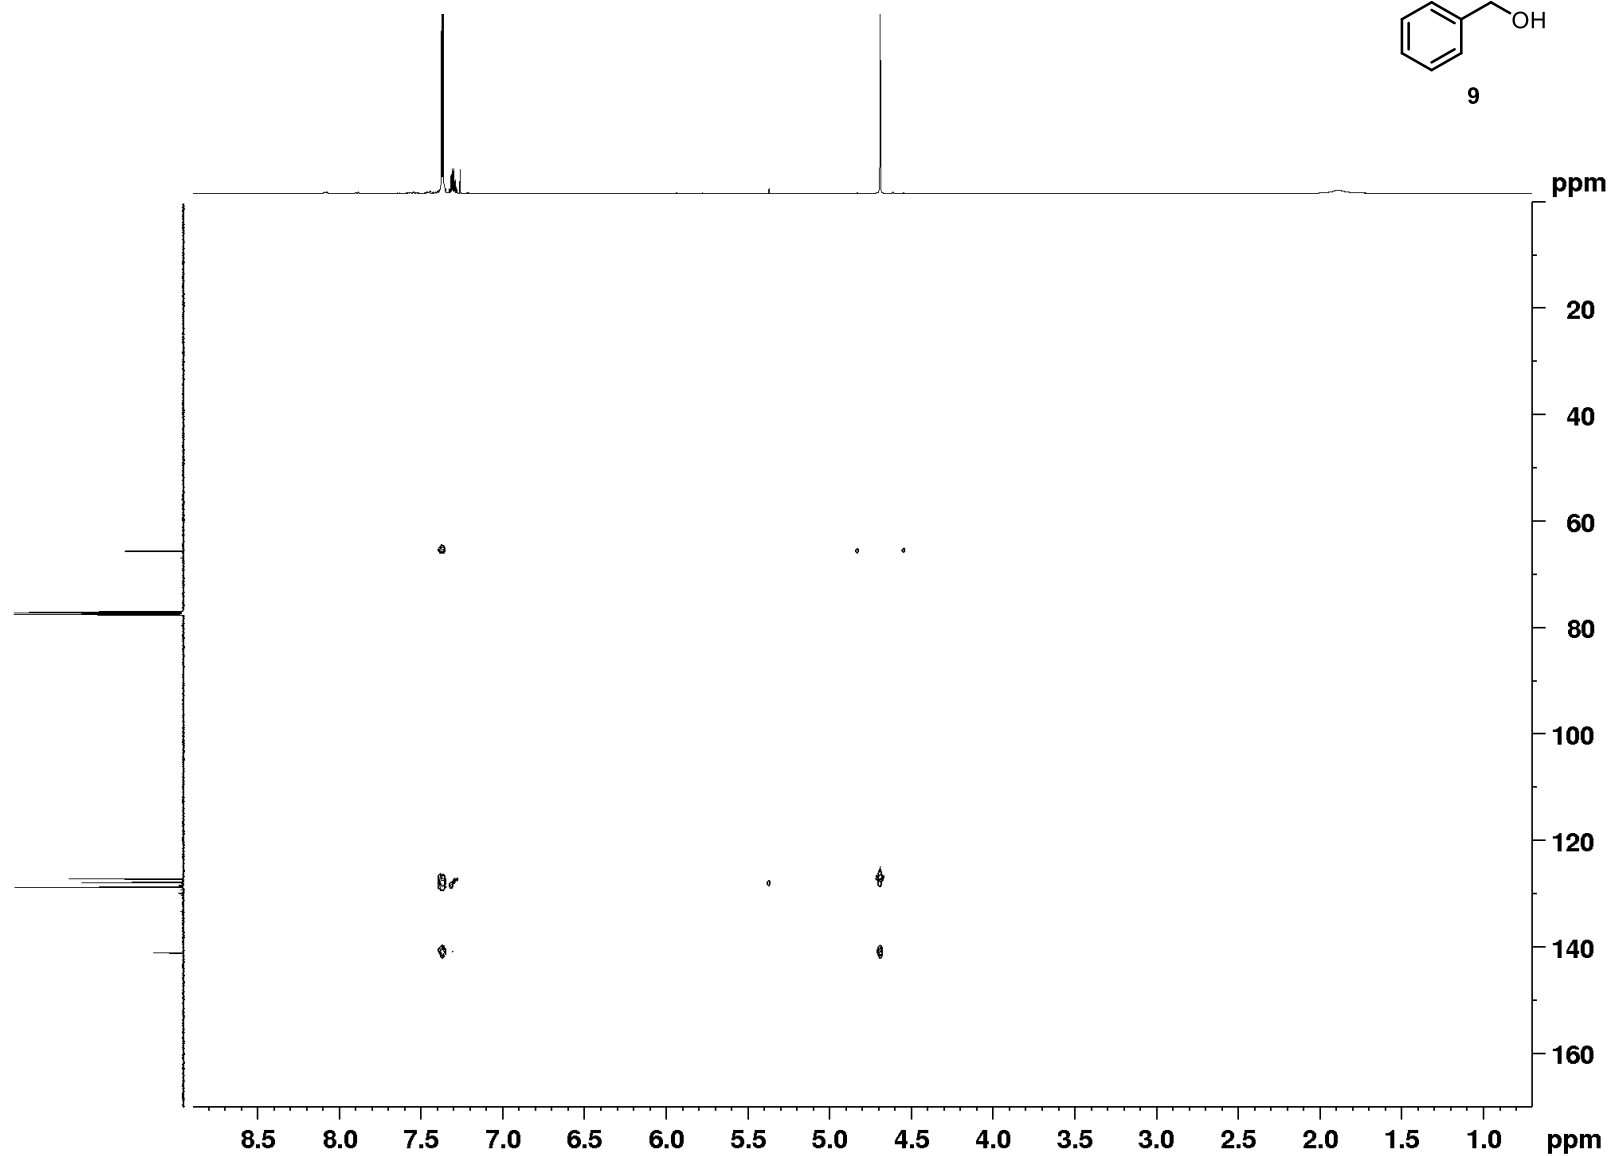

S40



$^1\text{H}$ - $^{13}\text{C}$  HSQC

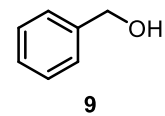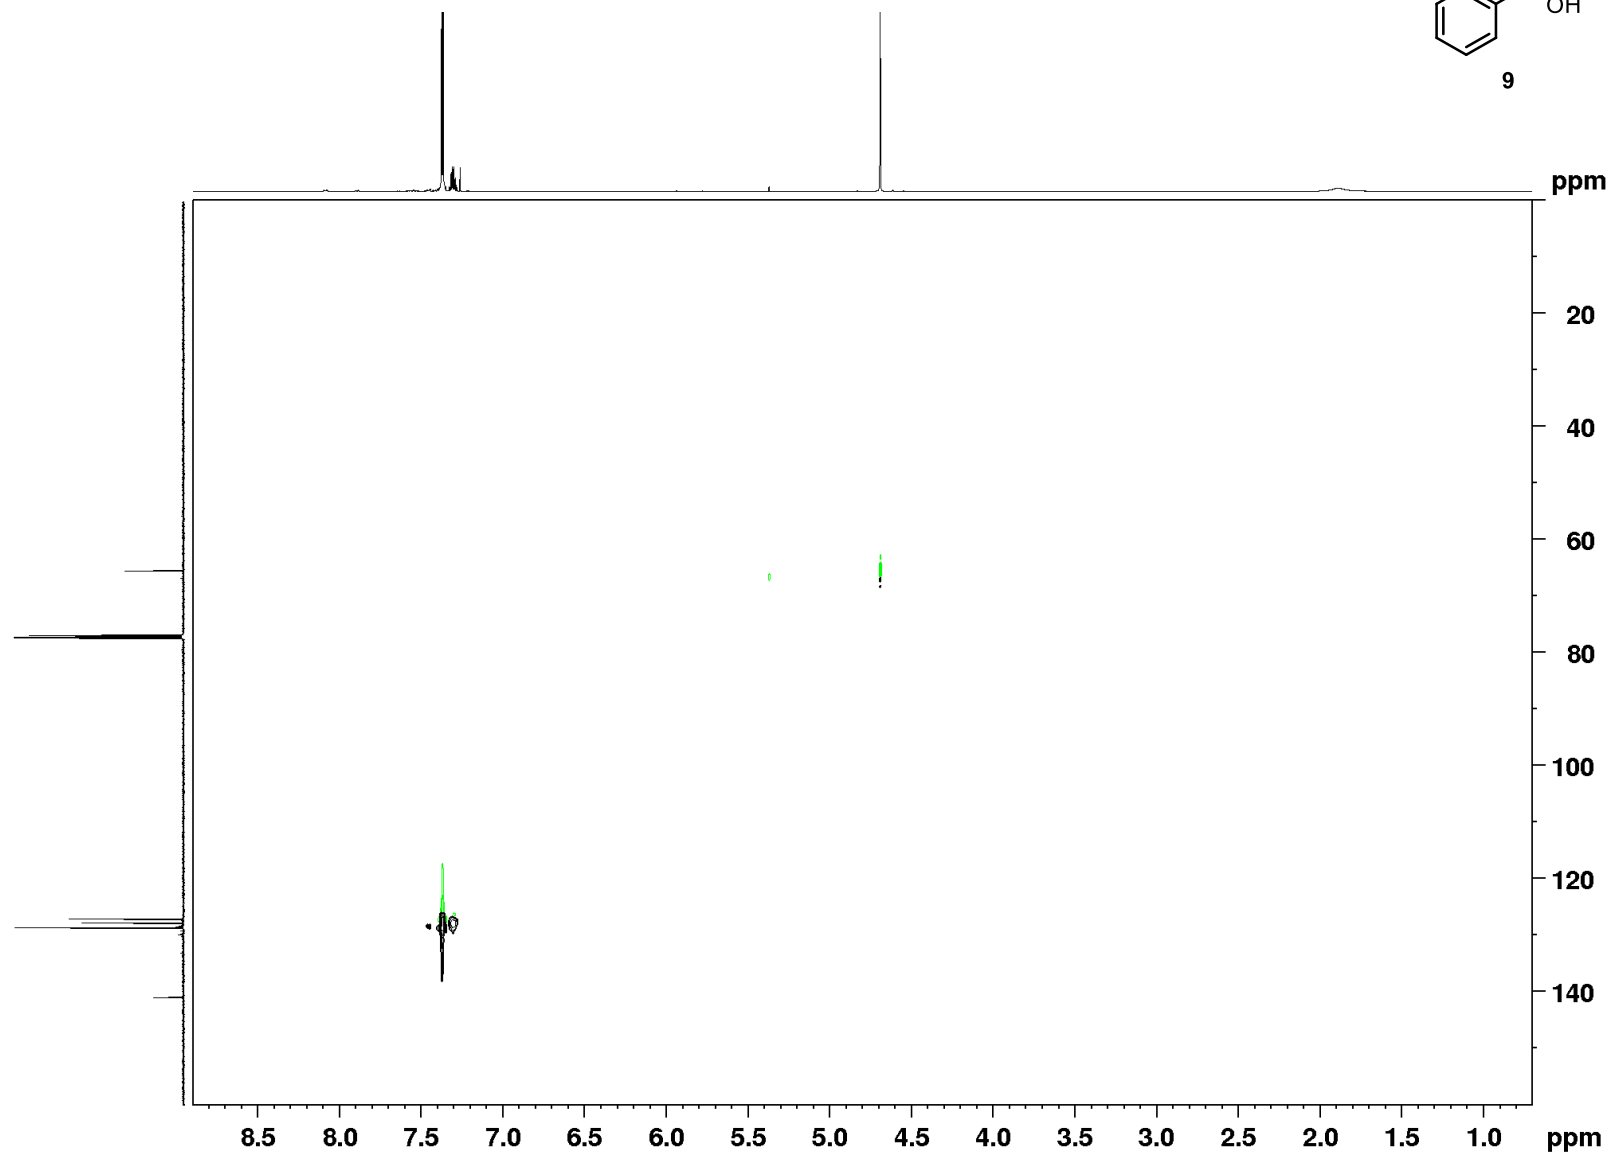

S41

# HRMS

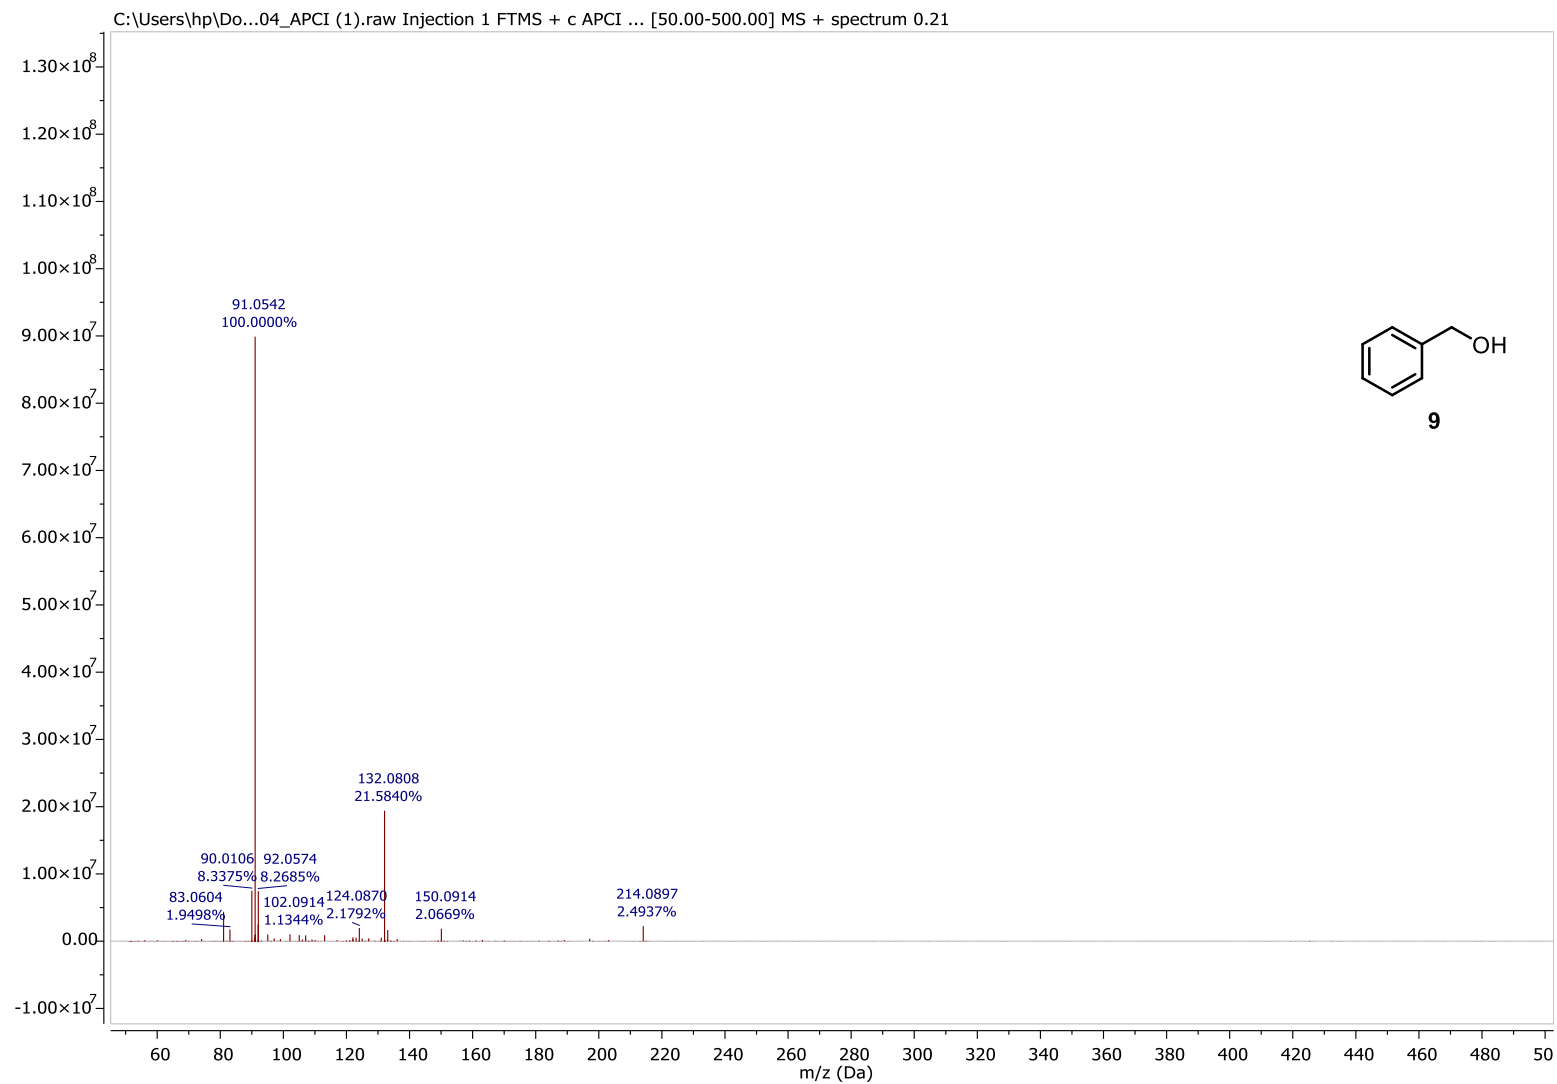

# Benzyl alcohol (9)

<sup>1</sup>H NMR

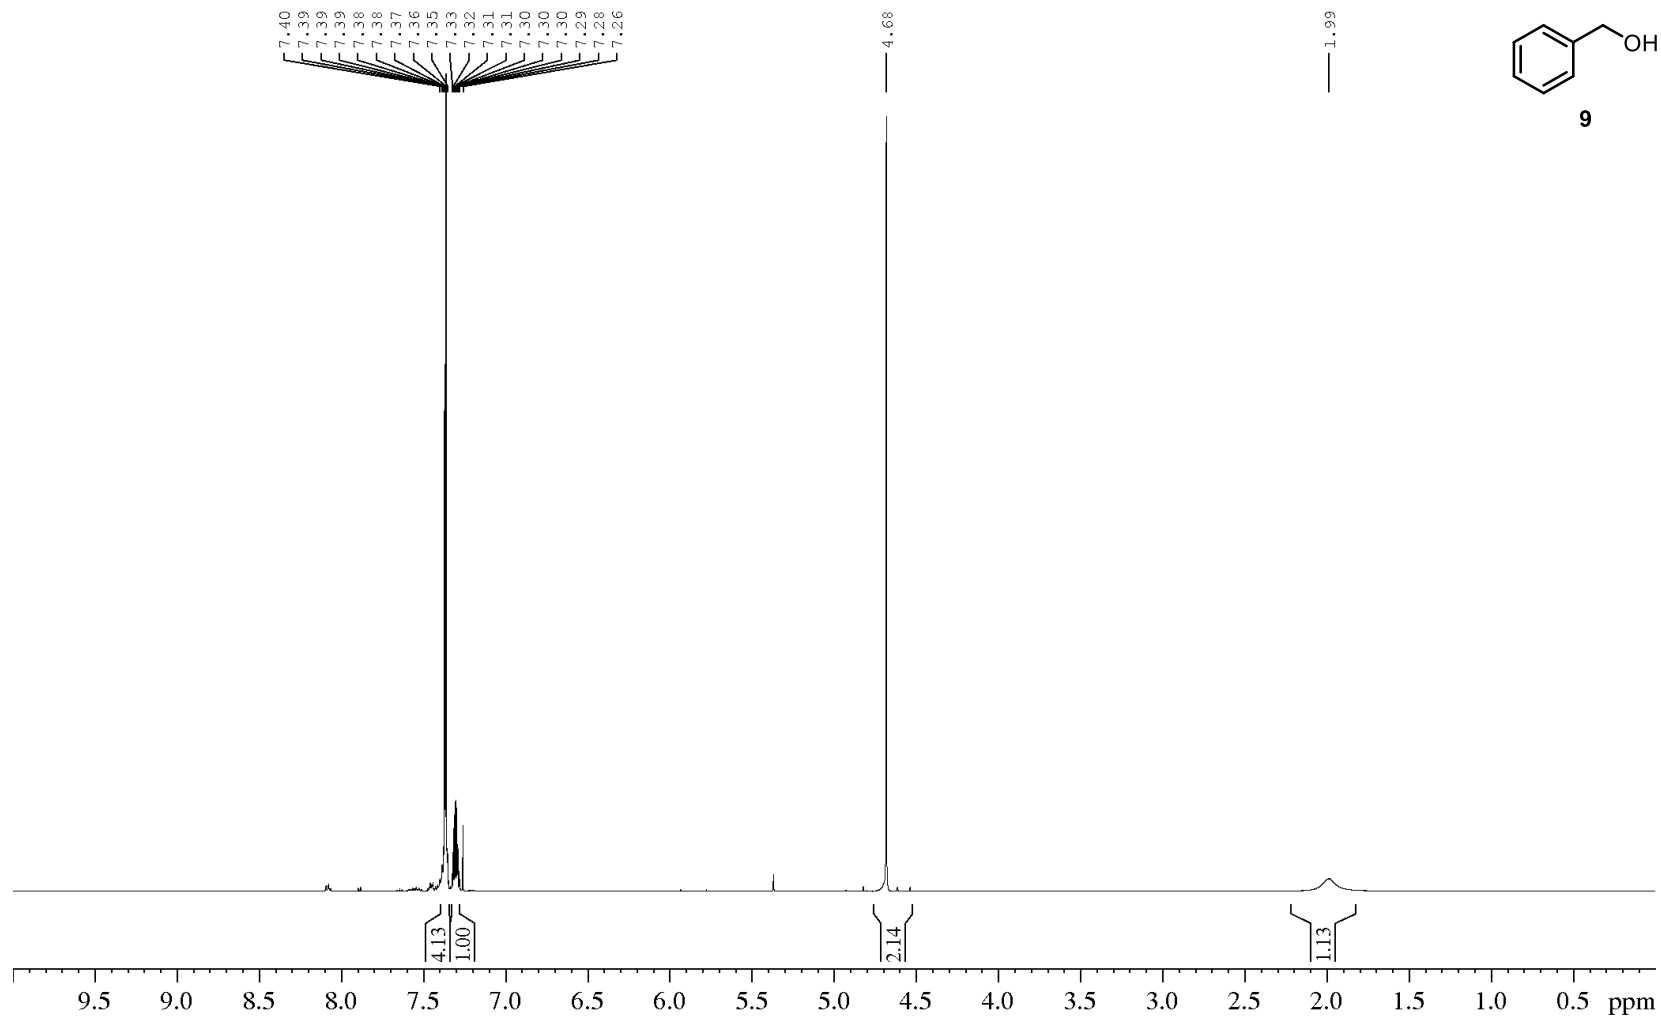

<sup>13</sup>C NMR

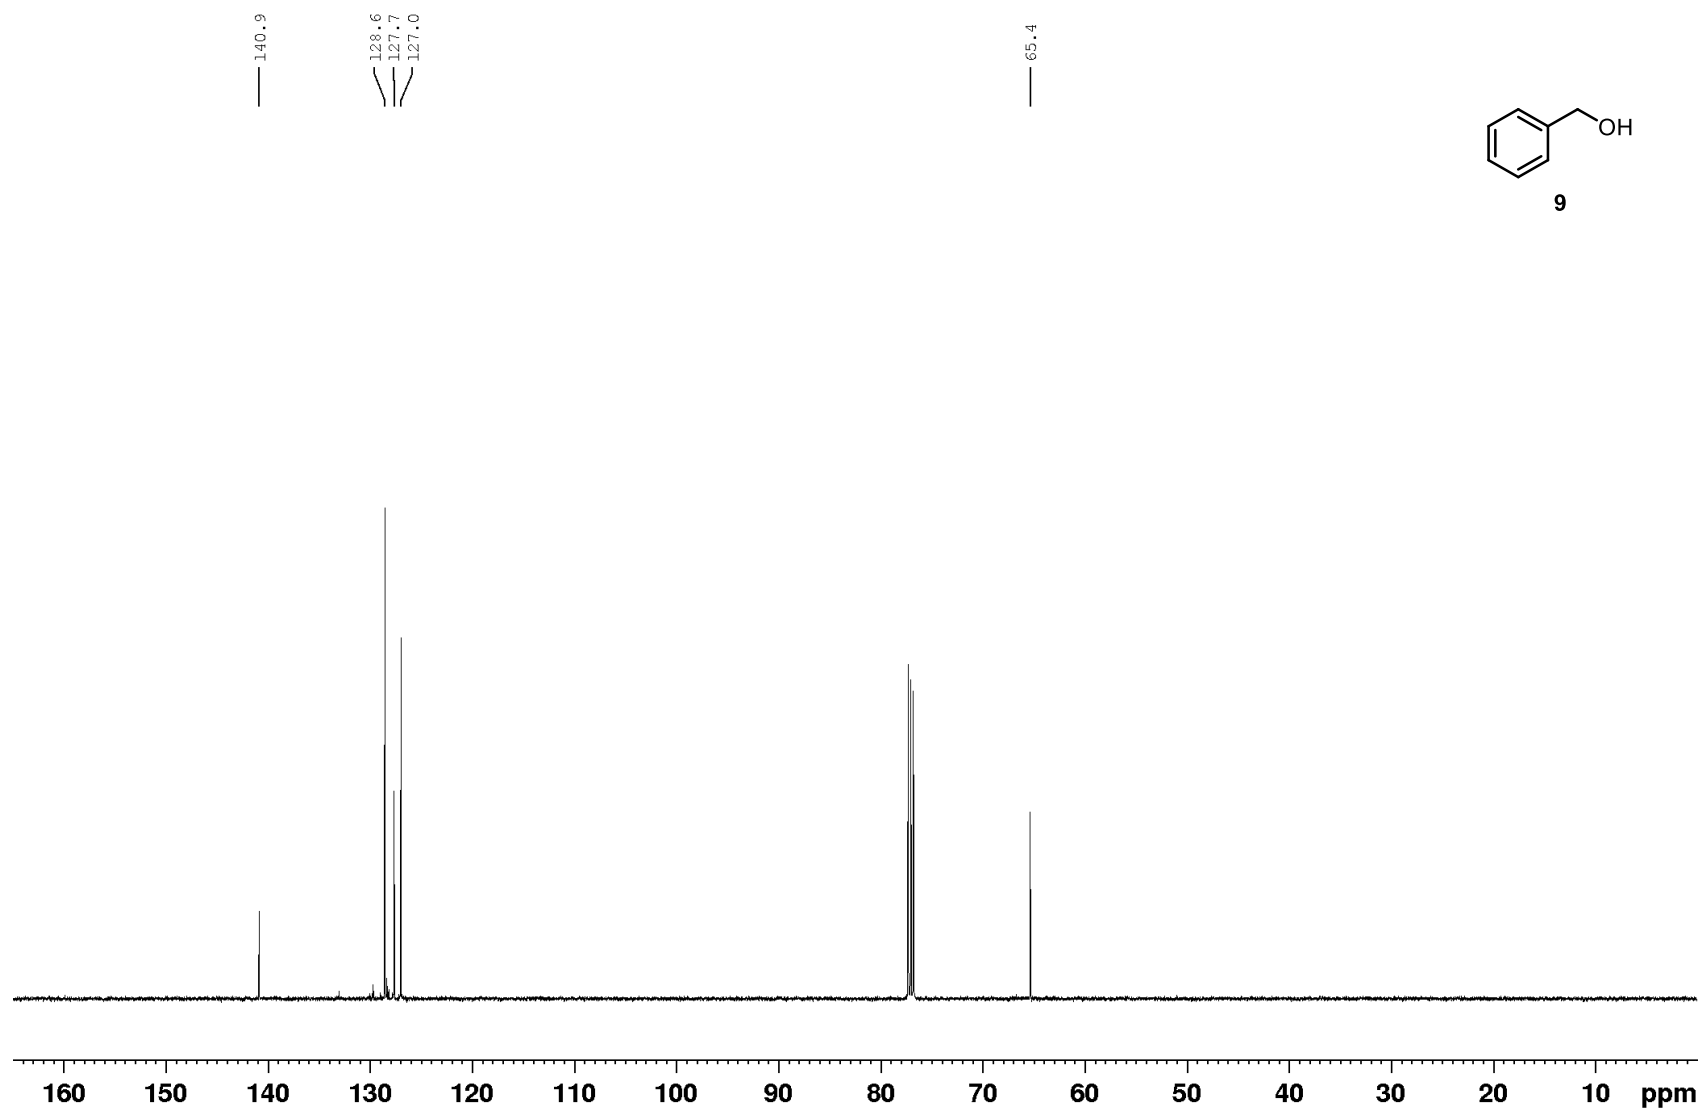

$^1\text{H}$ - $^1\text{H}$  COSY

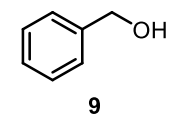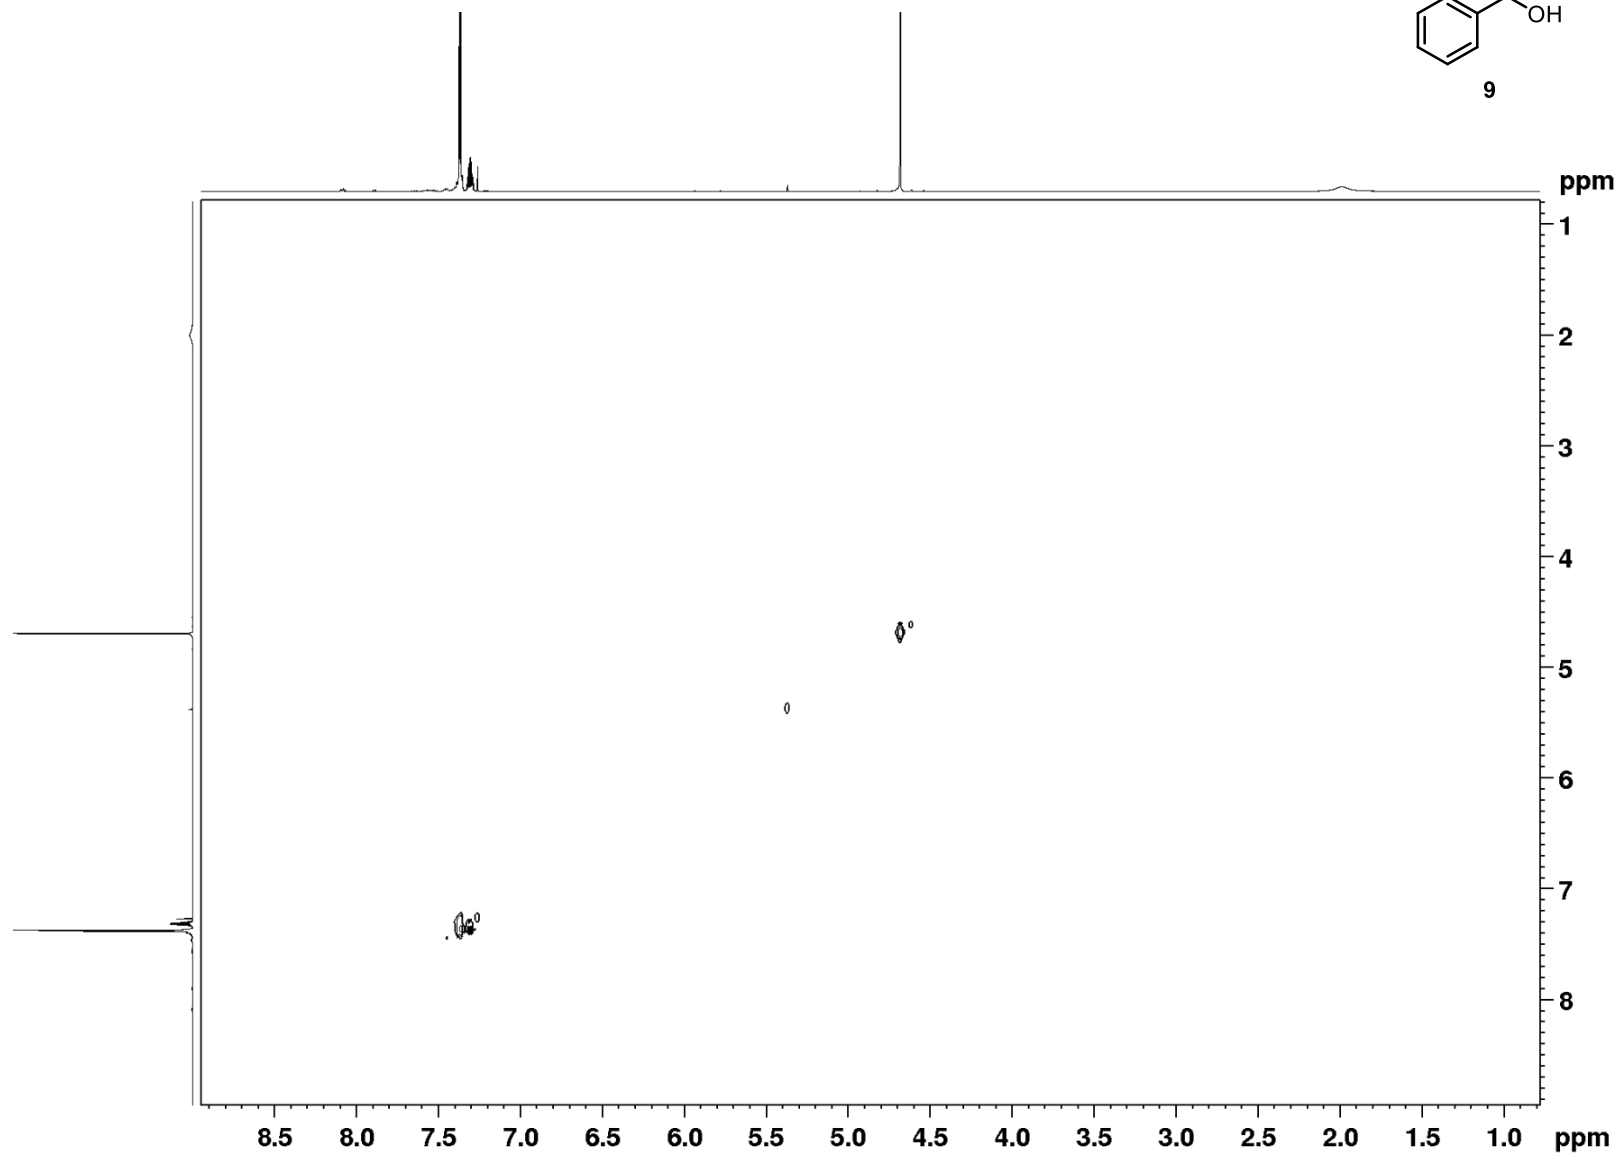

S45

$^1\text{H}$ - $^{13}\text{C}$  HMBC

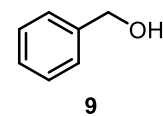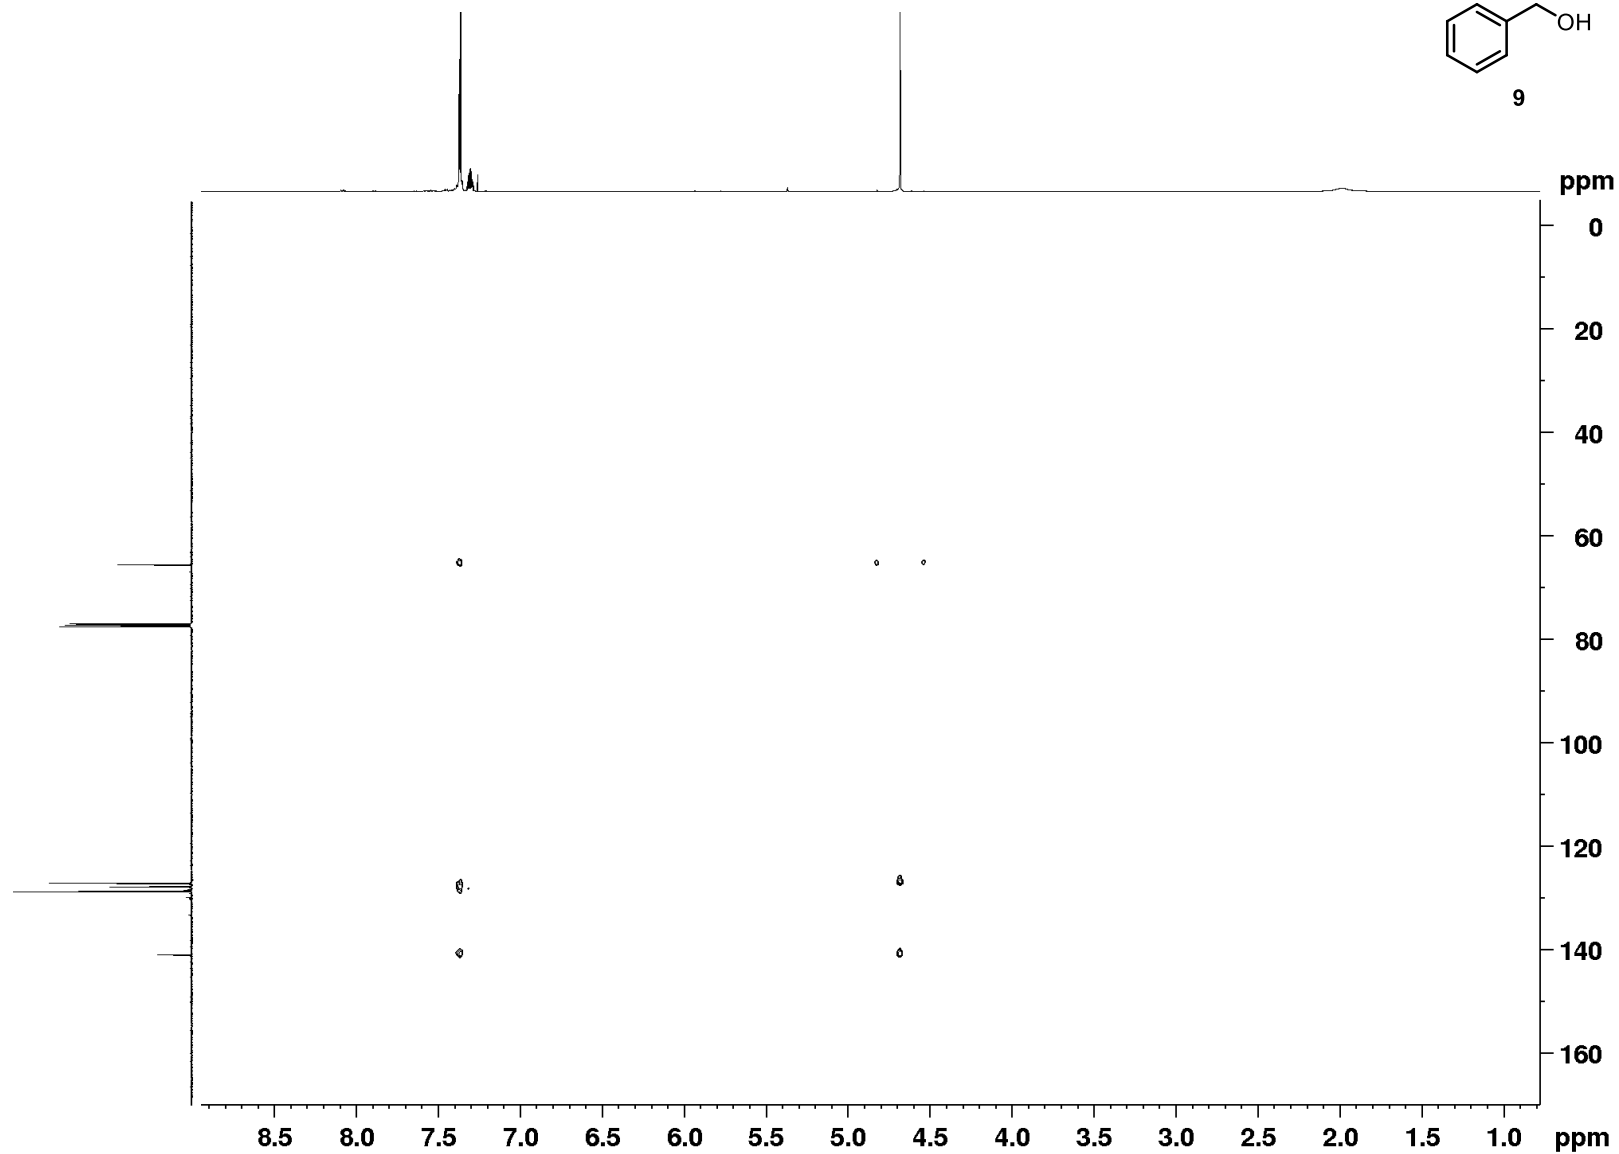

$^1\text{H}$ - $^{13}\text{C}$  HSQC

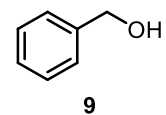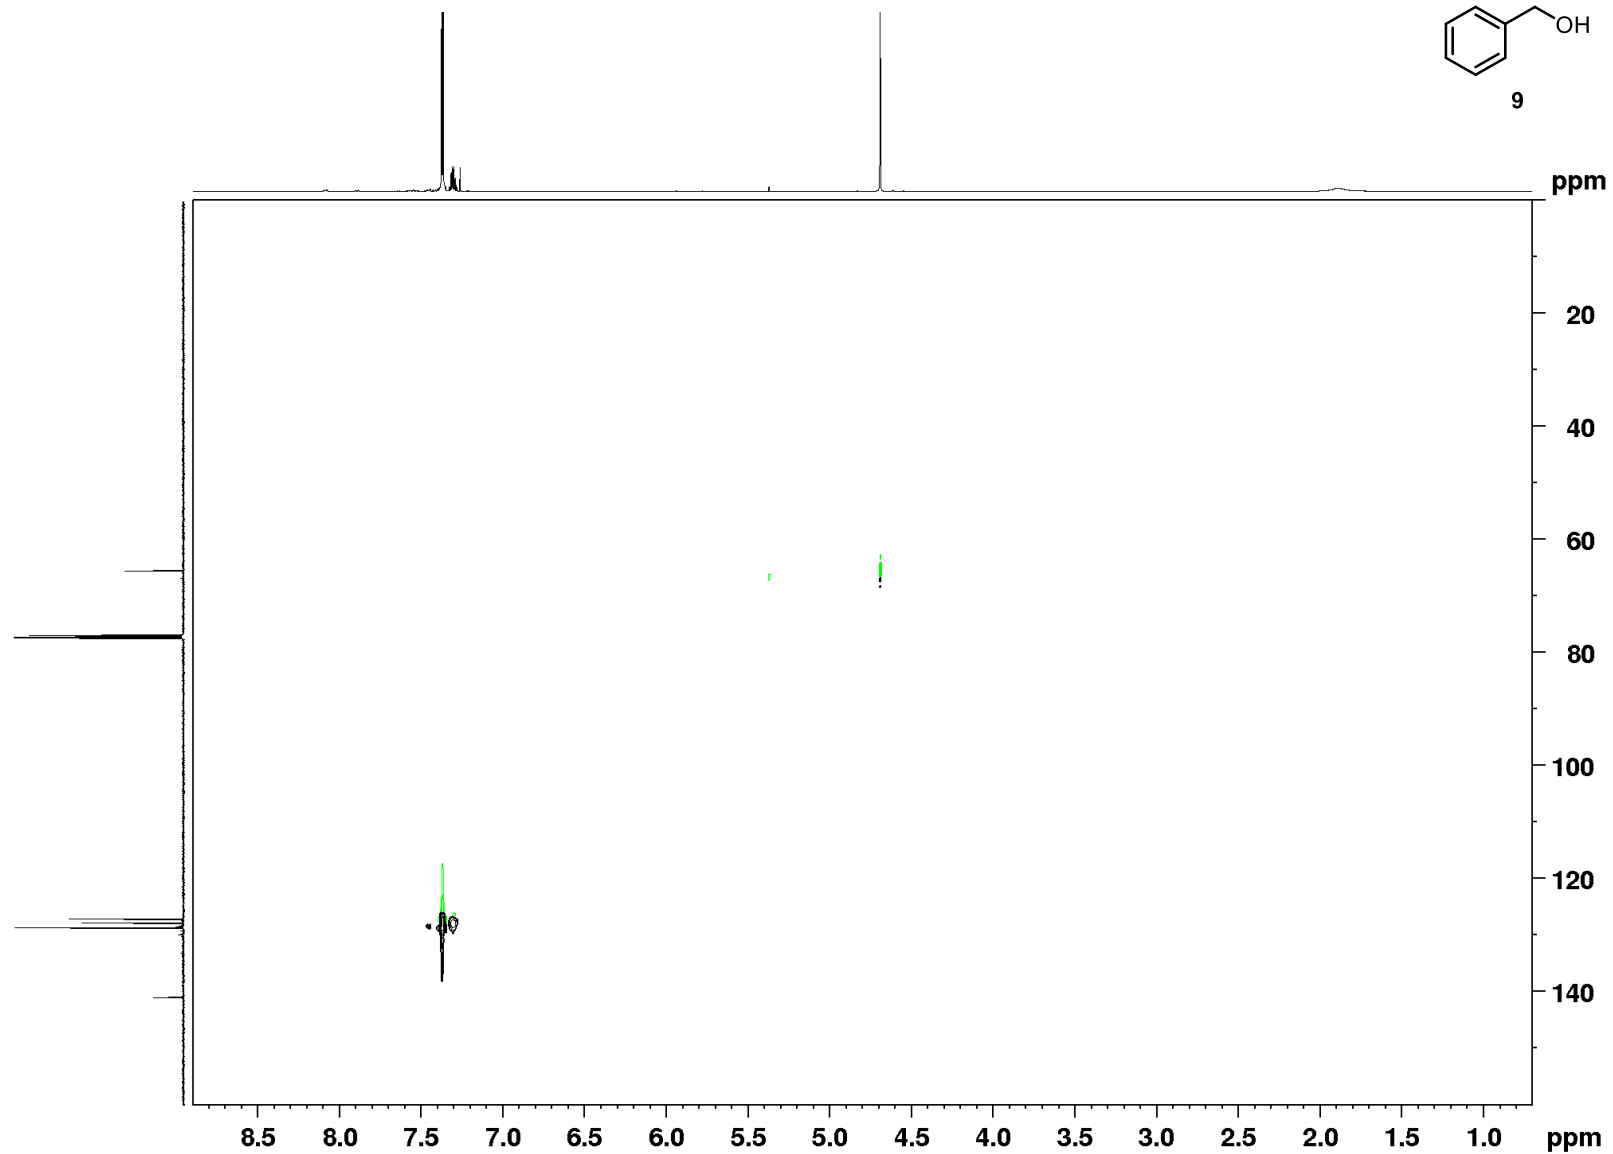

# HRMS

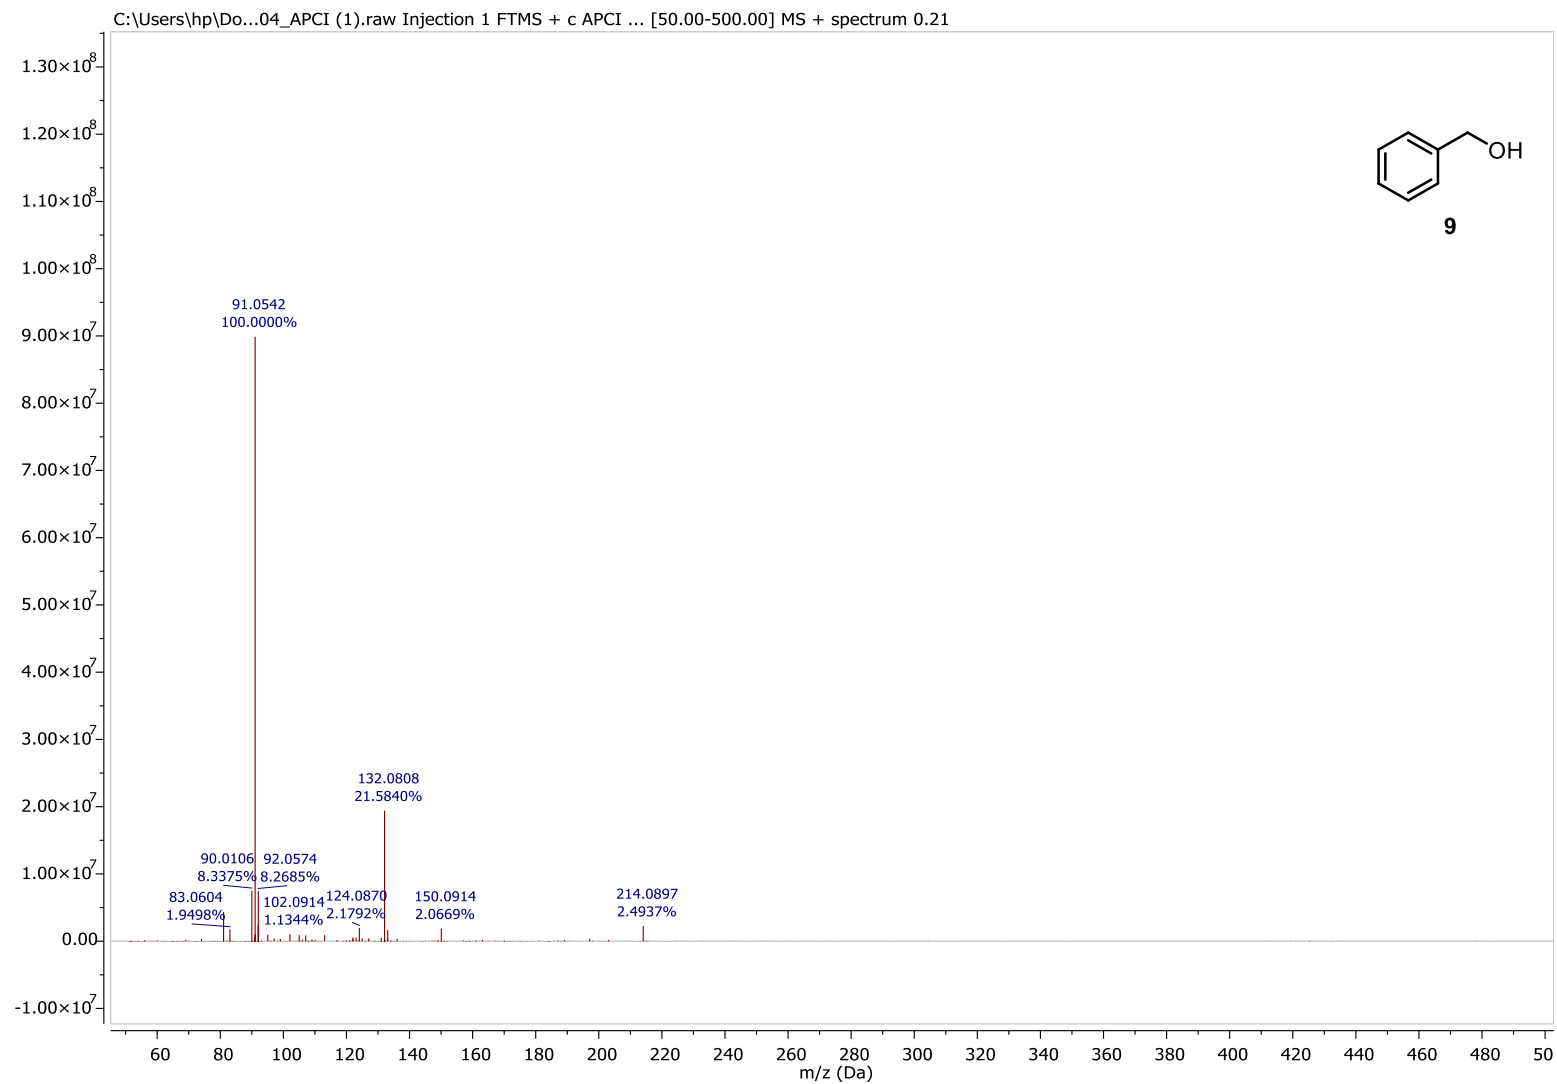



**(4-(1,3-Dioxan-2-yl)phenyl)methanol (11)**

<sup>1</sup>H NMR

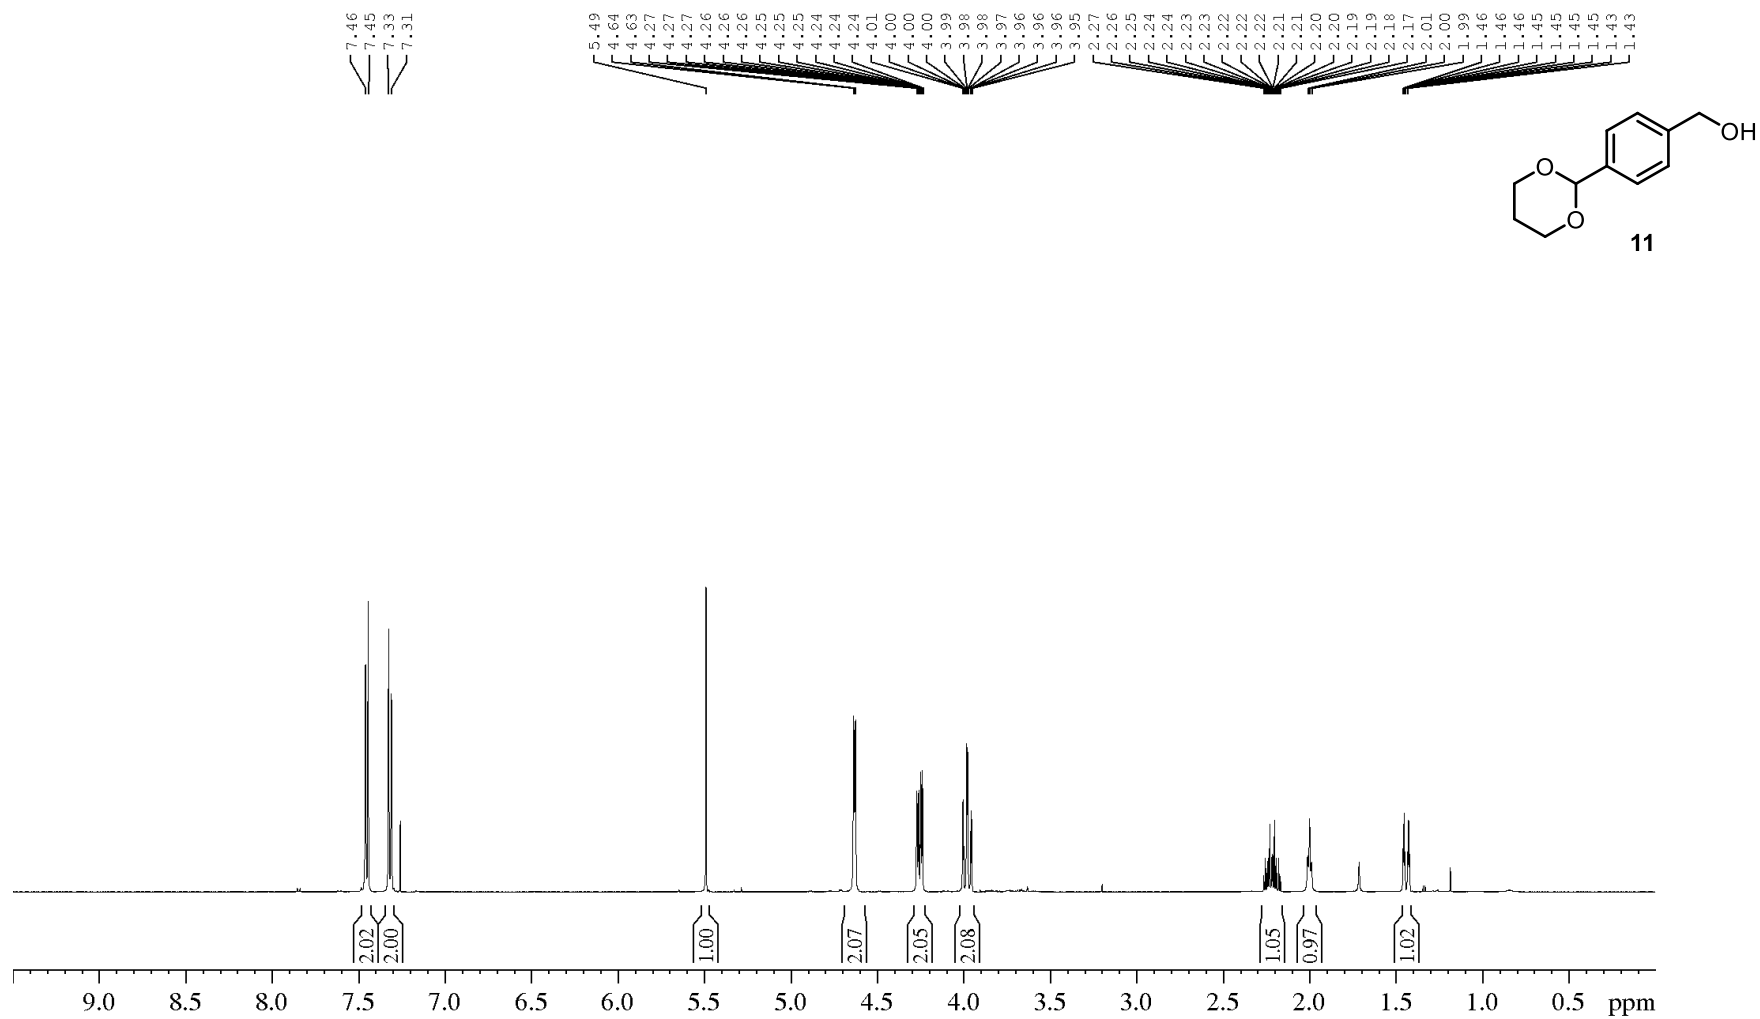

<sup>13</sup>C NMR

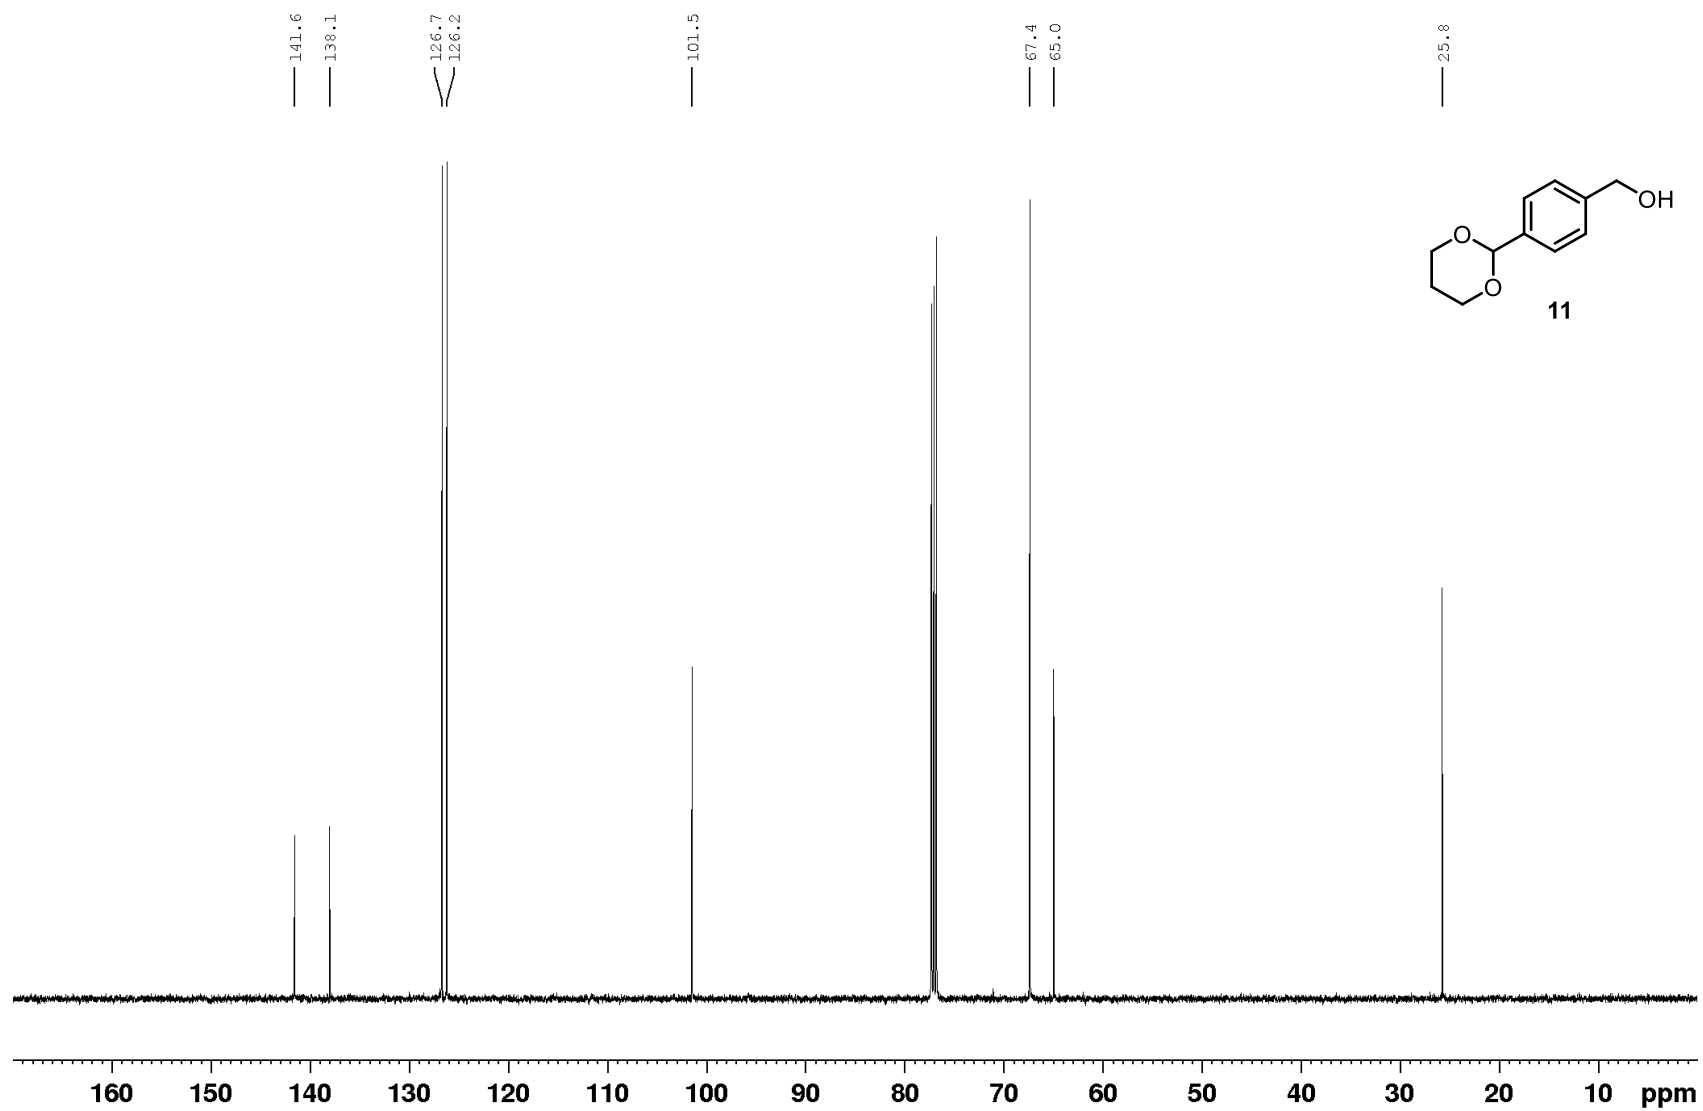

<sup>1</sup>H-<sup>1</sup>H COSY

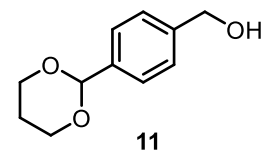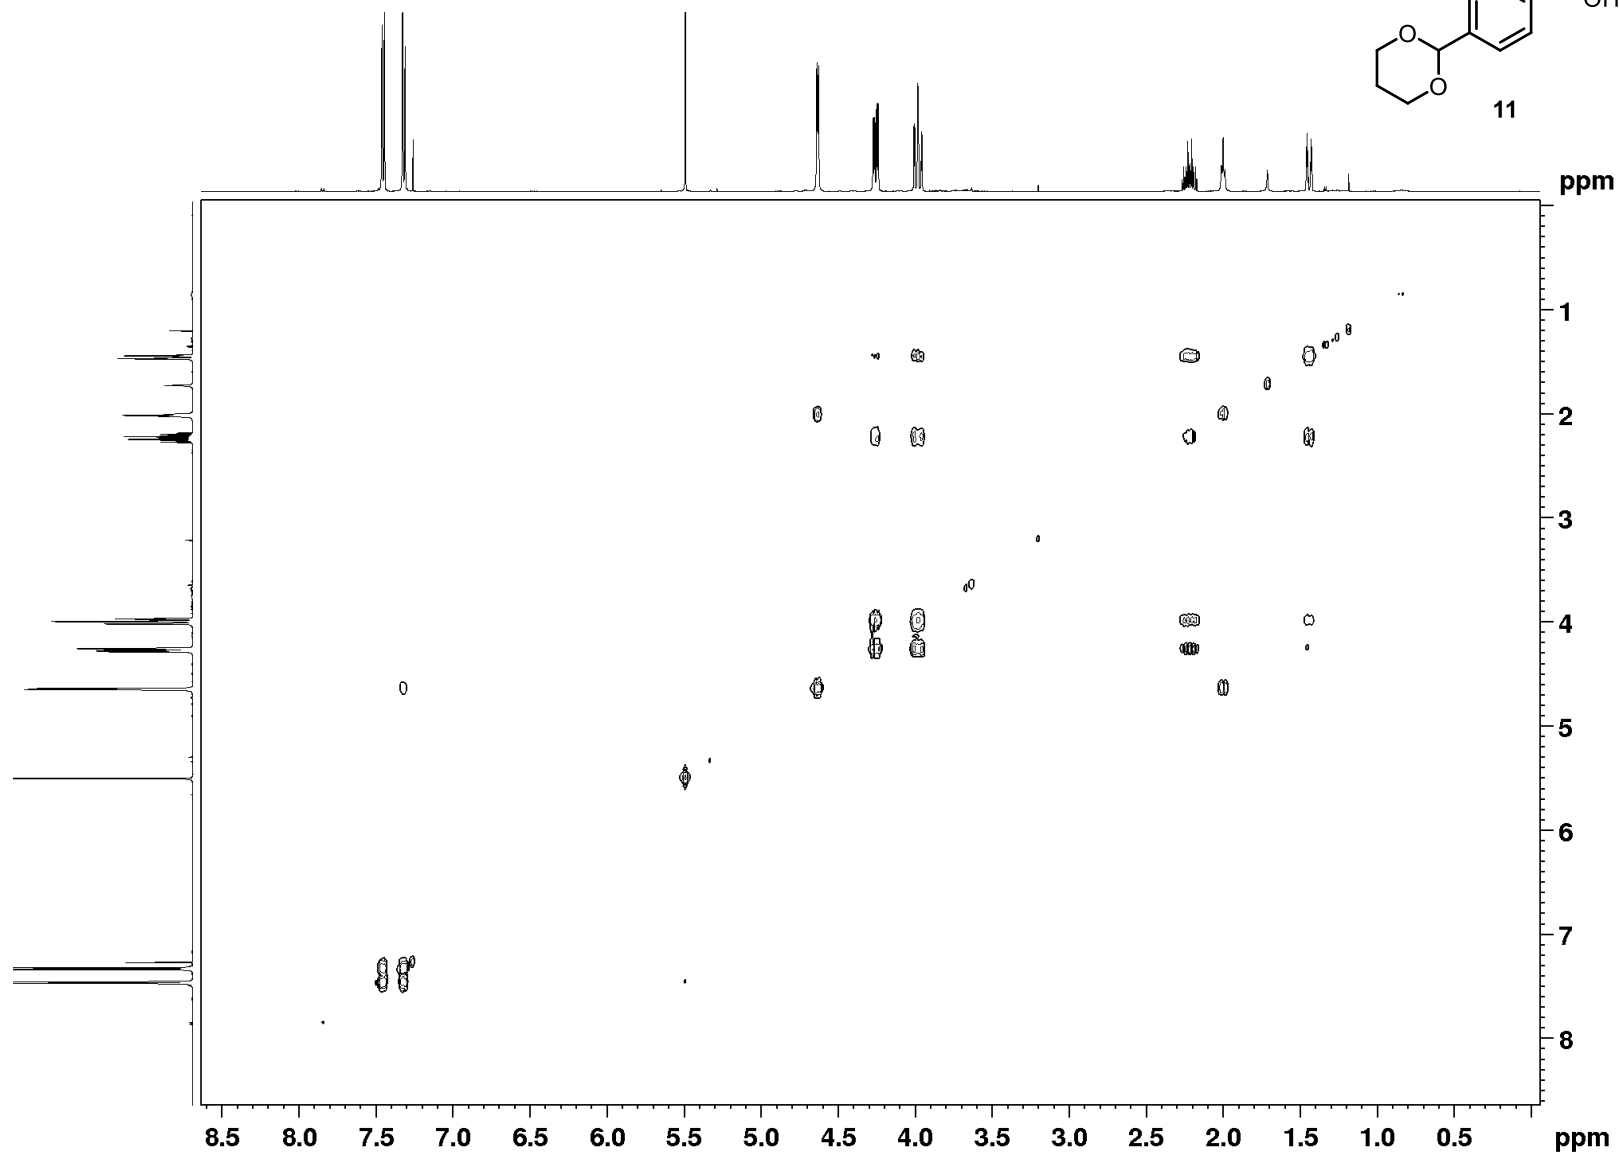

S51

$^1\text{H}$ - $^{13}\text{C}$  HMBC

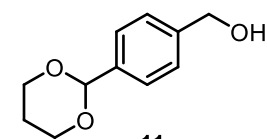

ppm

20

40

60

80

100

120

140

160

ppm

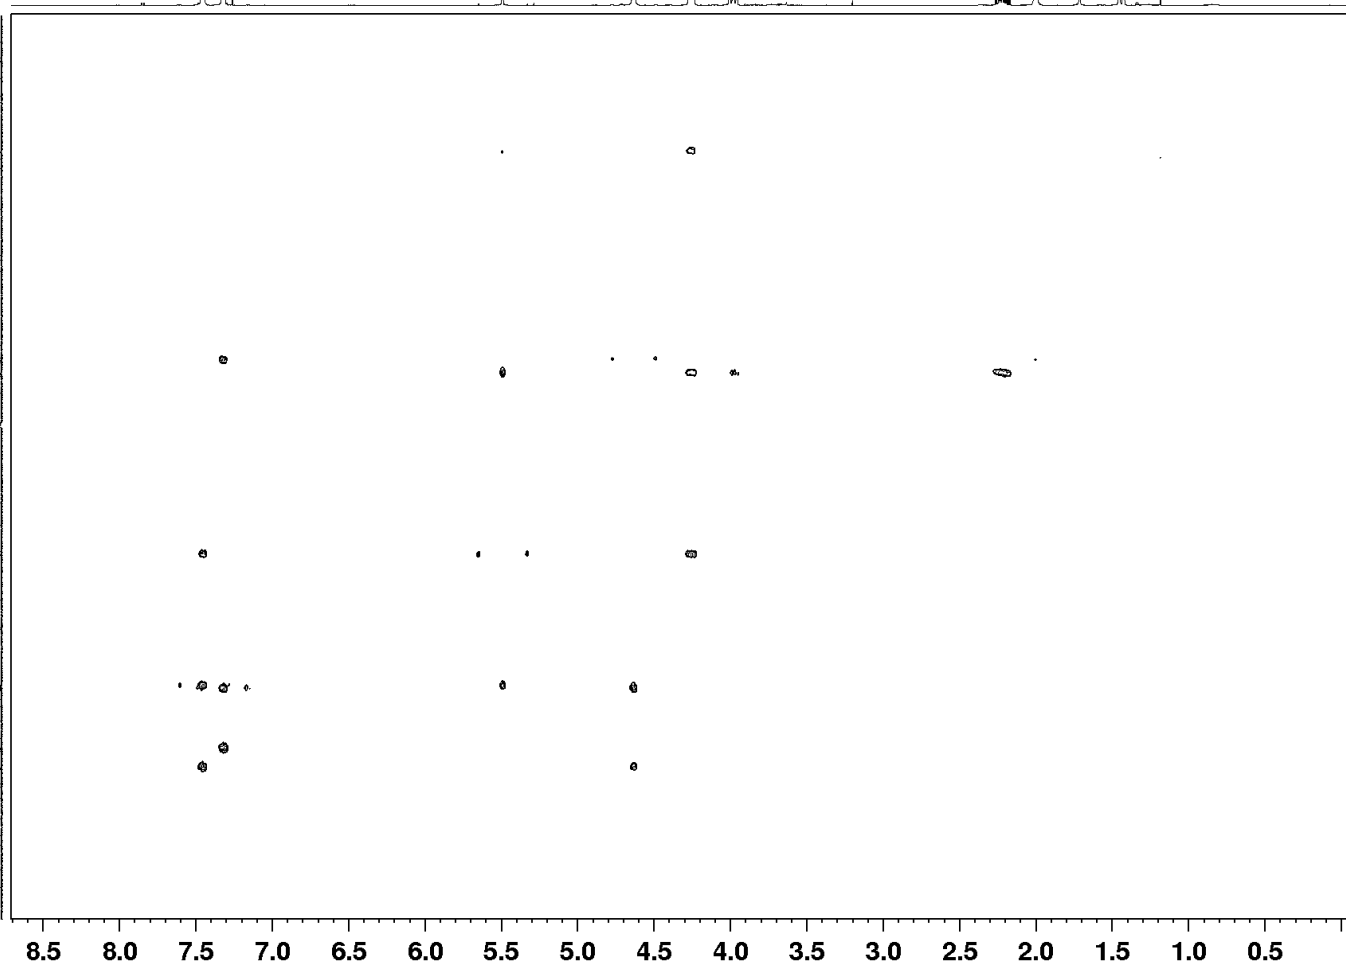

S52

$^1\text{H}$ - $^{13}\text{C}$  HSQC

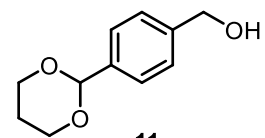

ppm

0

20

40

60

80

100

120

140

160

ppm

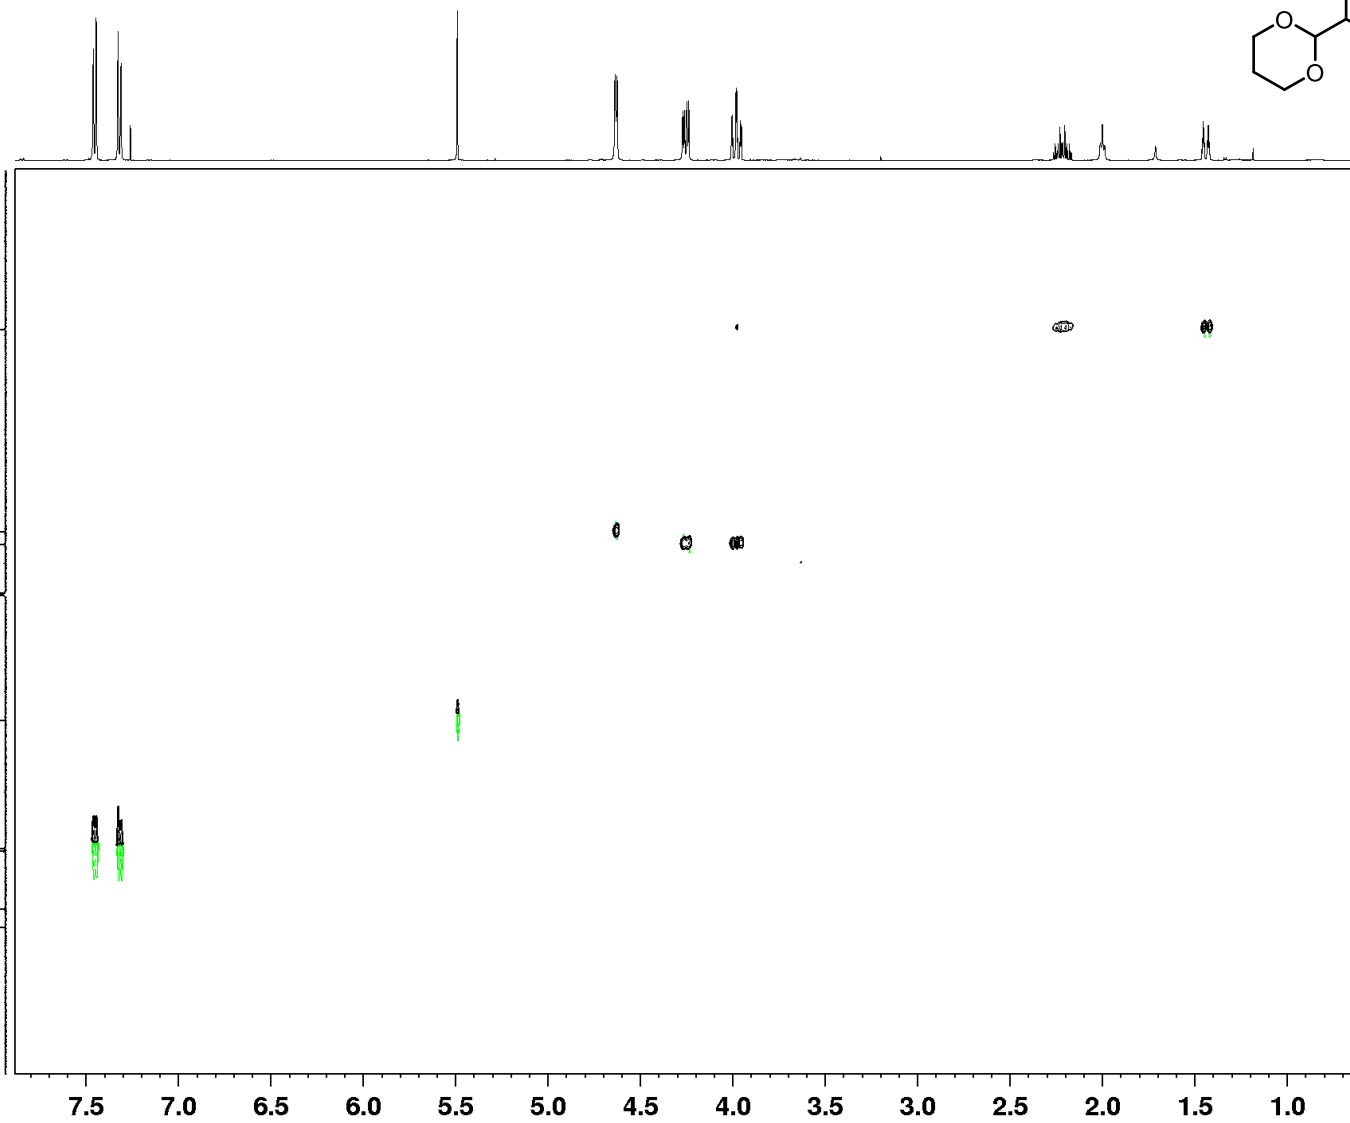

S53

# HRMS

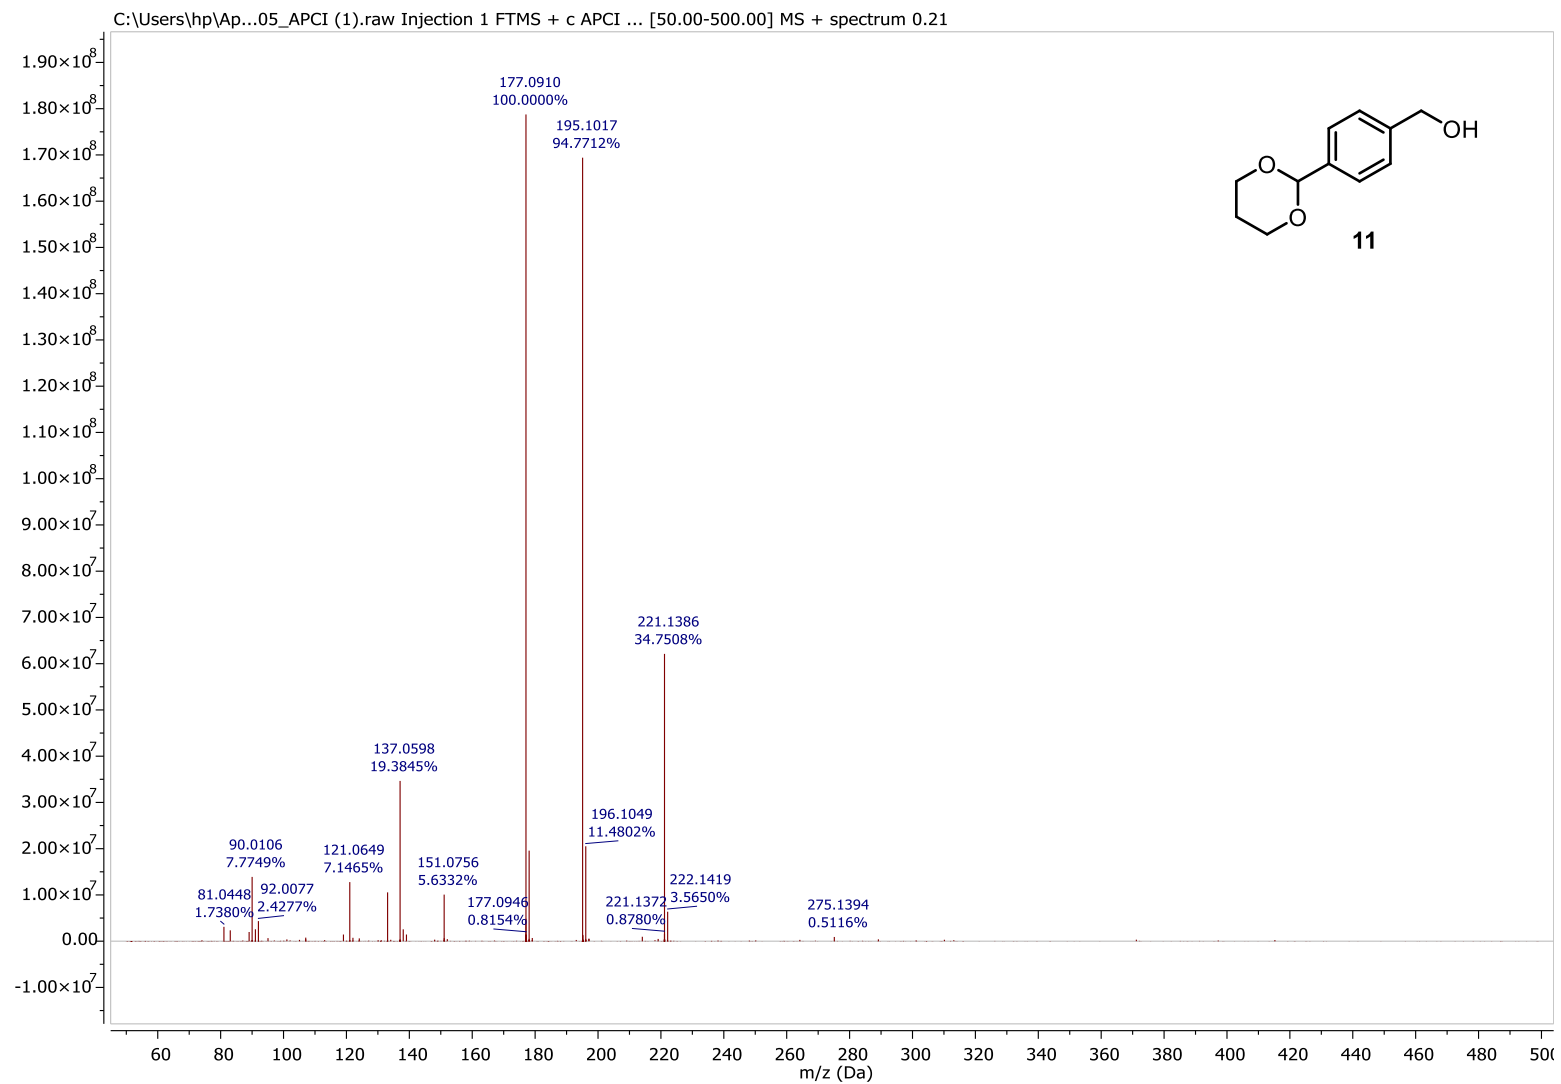

IR

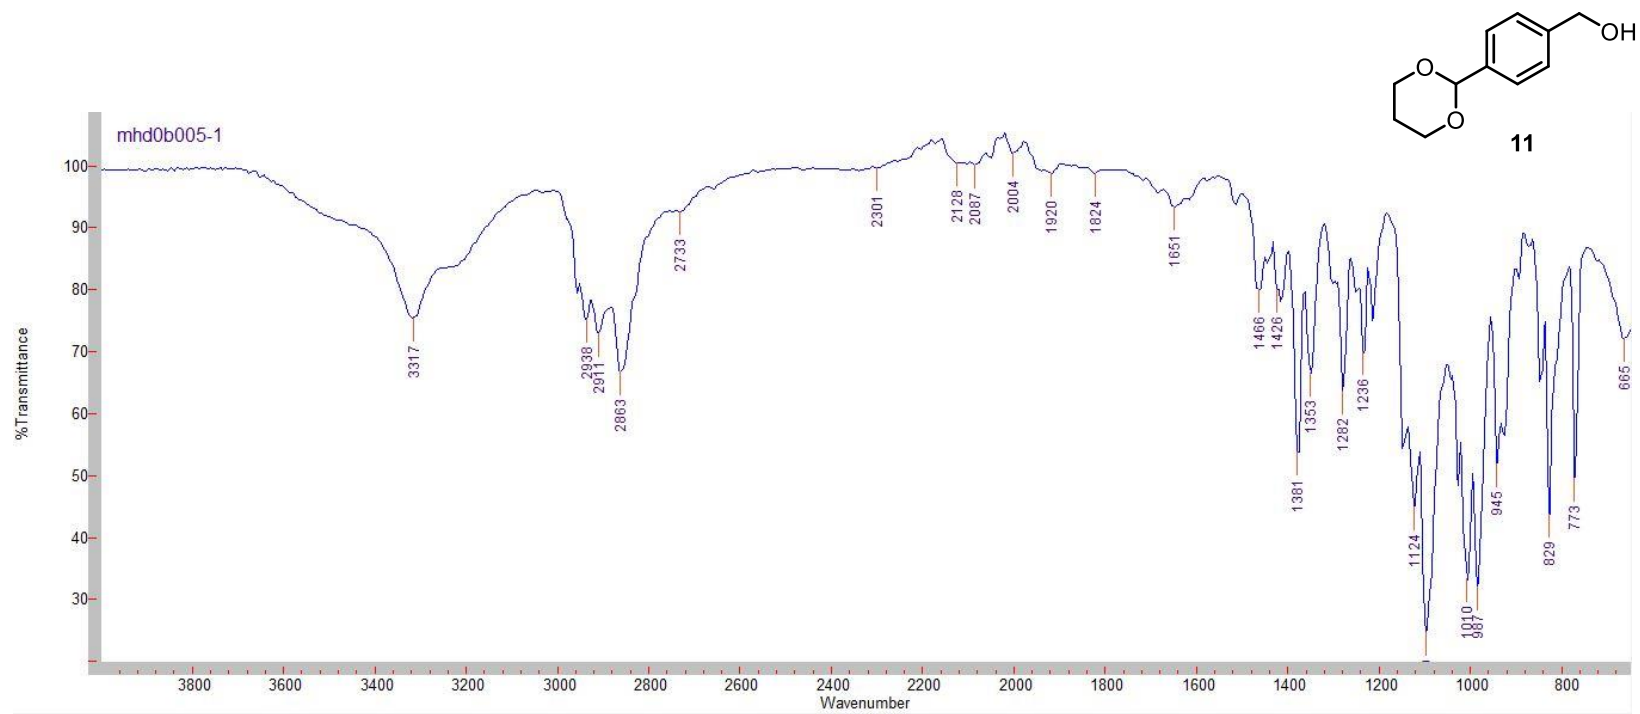

**[Cu(IMes)Cl] (7a)**

<sup>1</sup>H-NMR

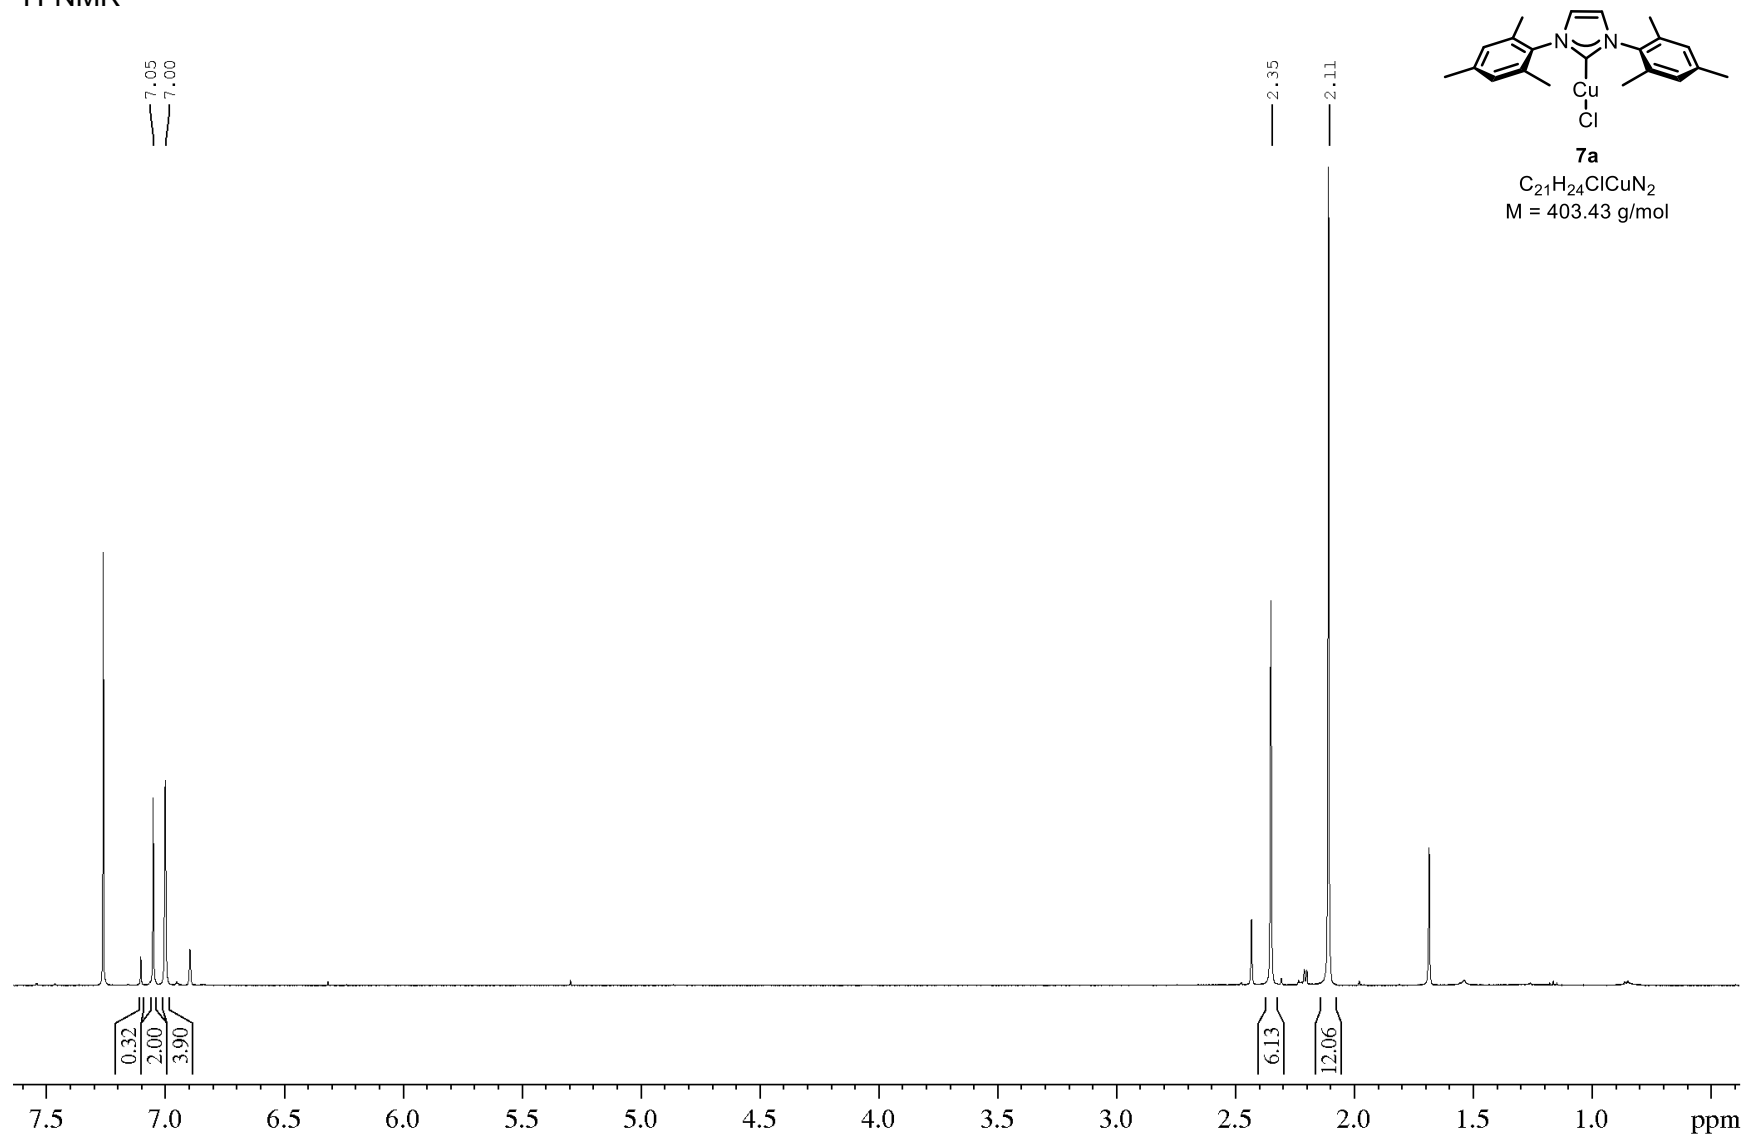



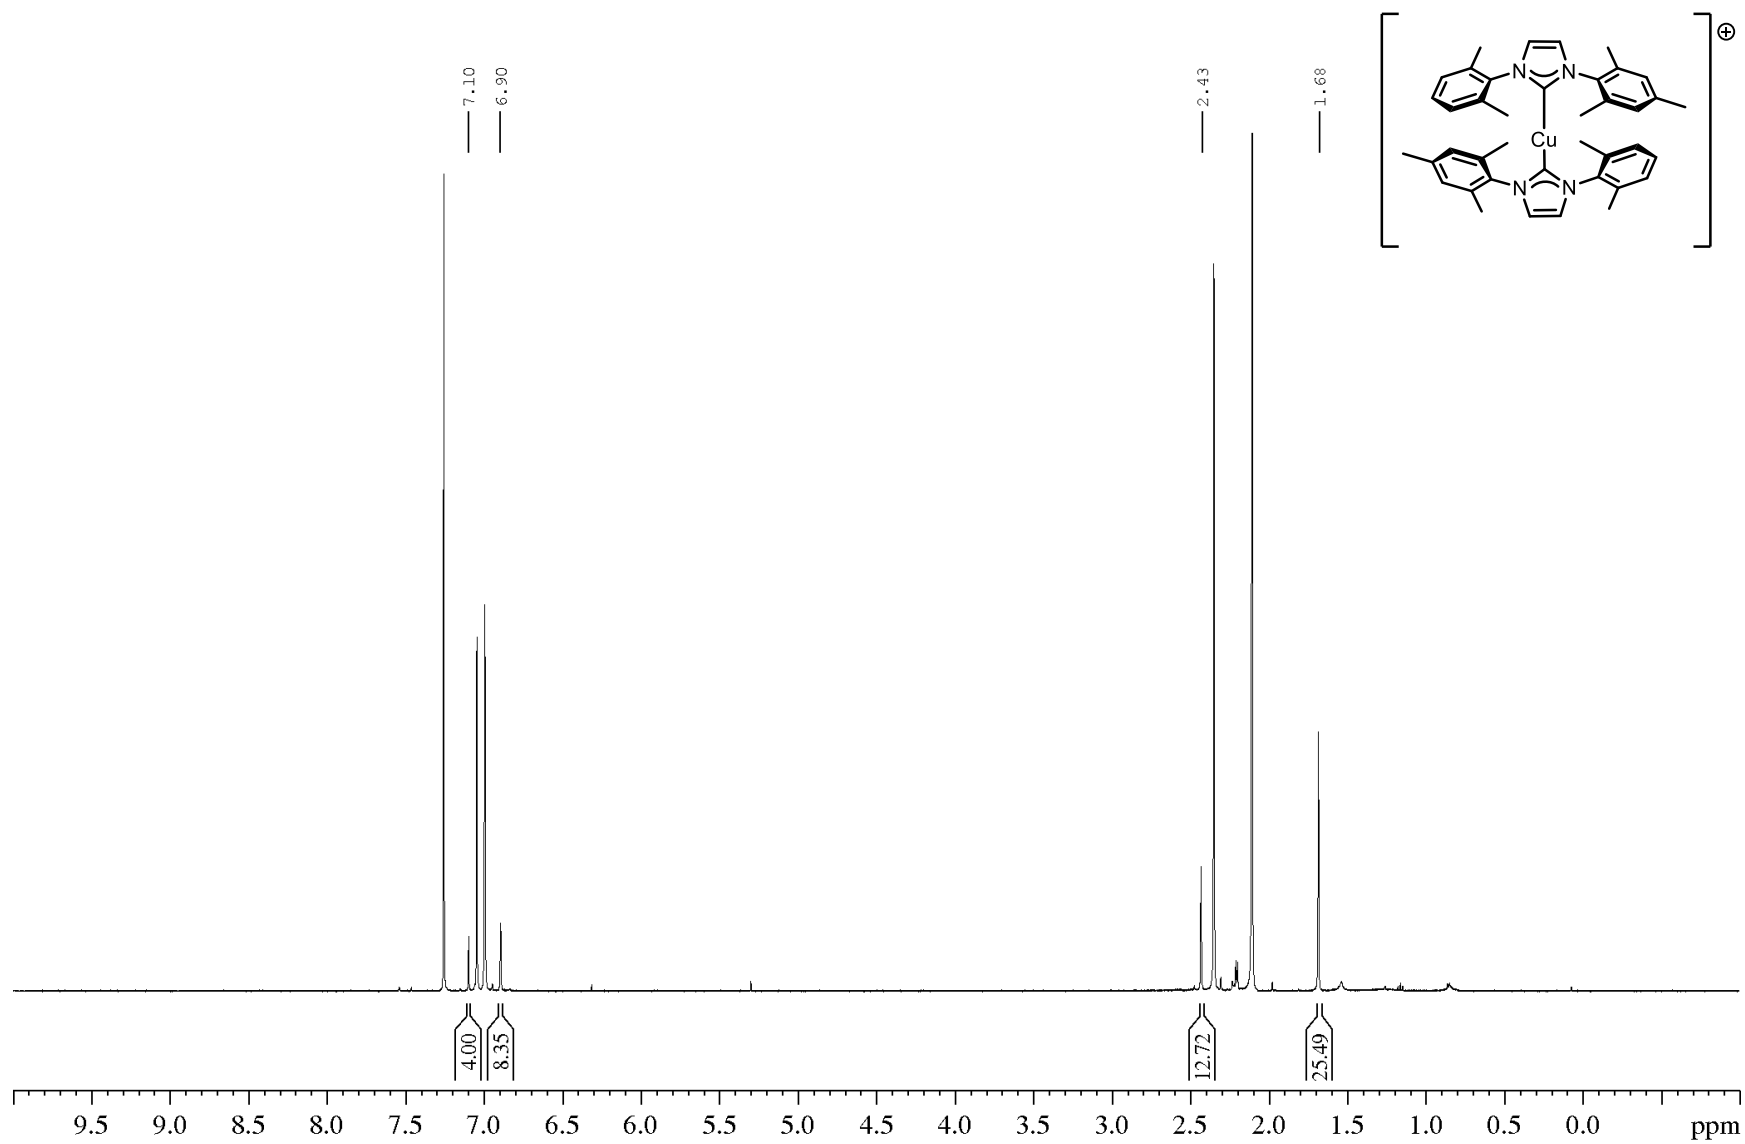

[Cu(SIMes)Cl] (7b)

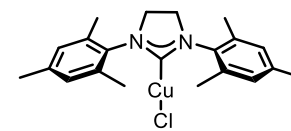

**7b**  
 $C_{21}H_{26}ClCuN_2$   
 $M = 405.45 \text{ g/mol}$

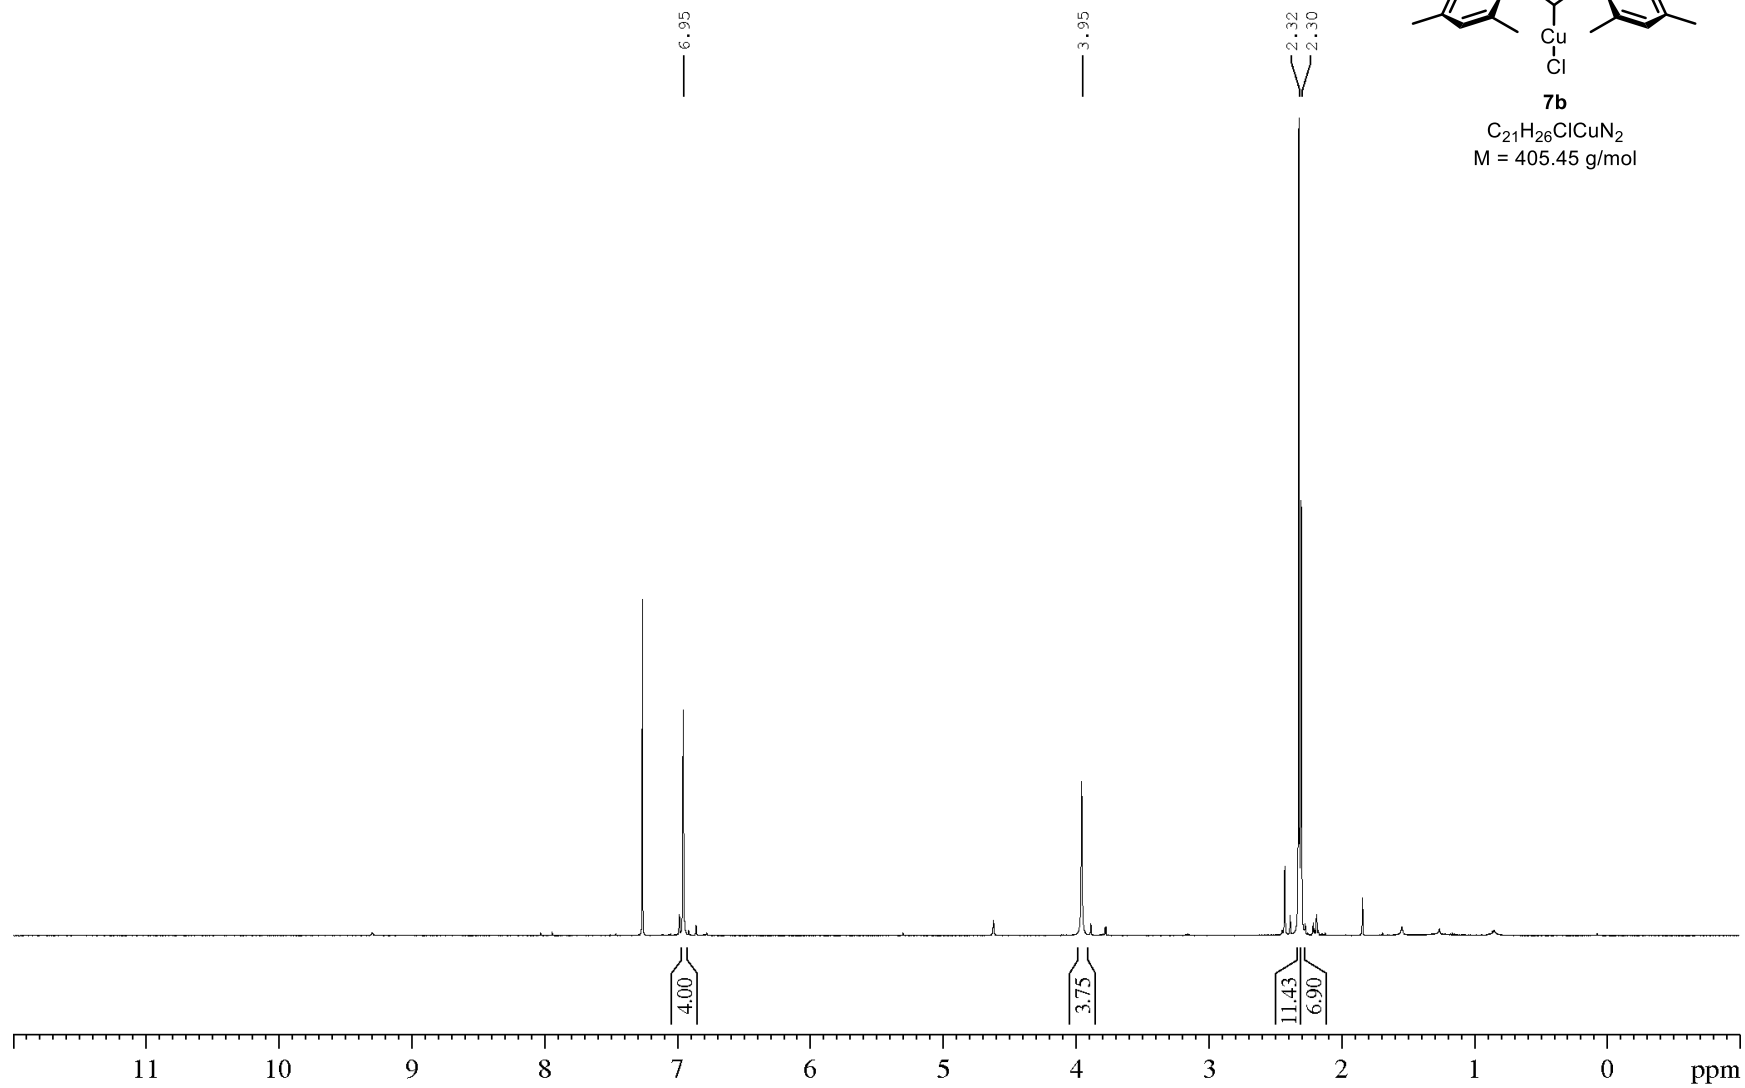

[Cu(IPr)Cl] (7c)

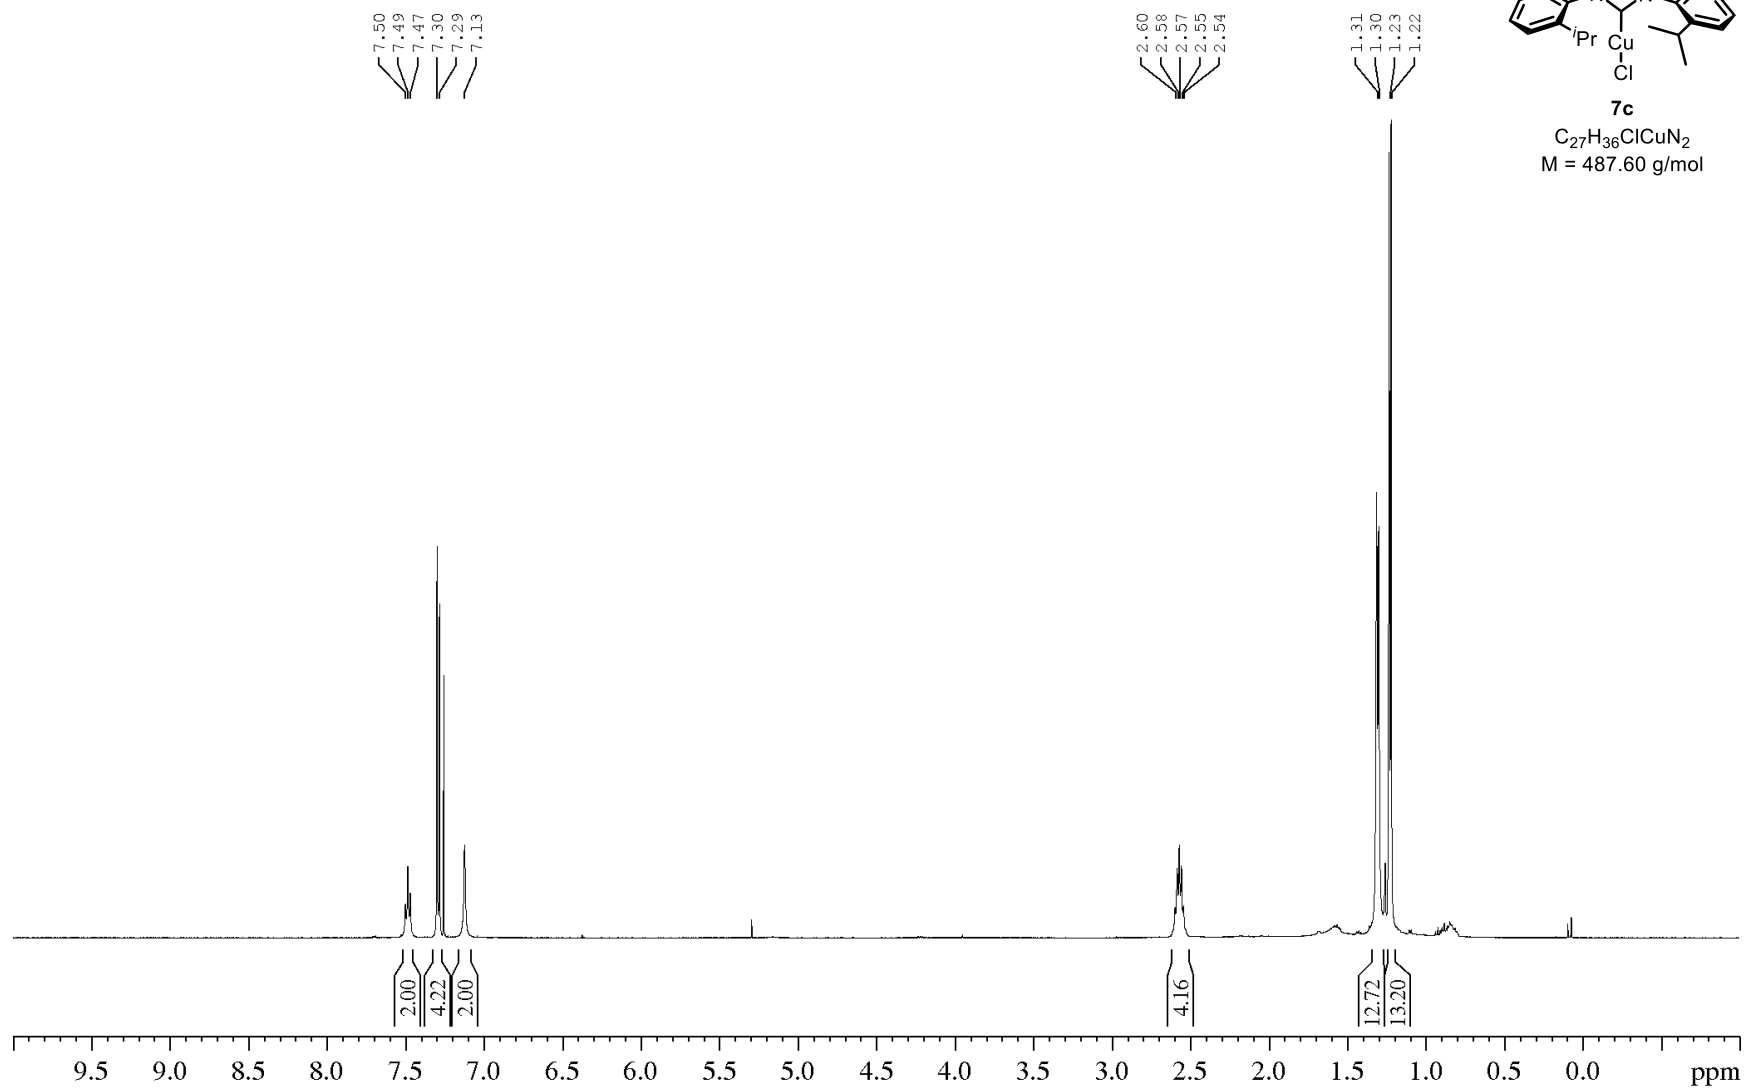

[Cu(SIPr)Cl] (7d)

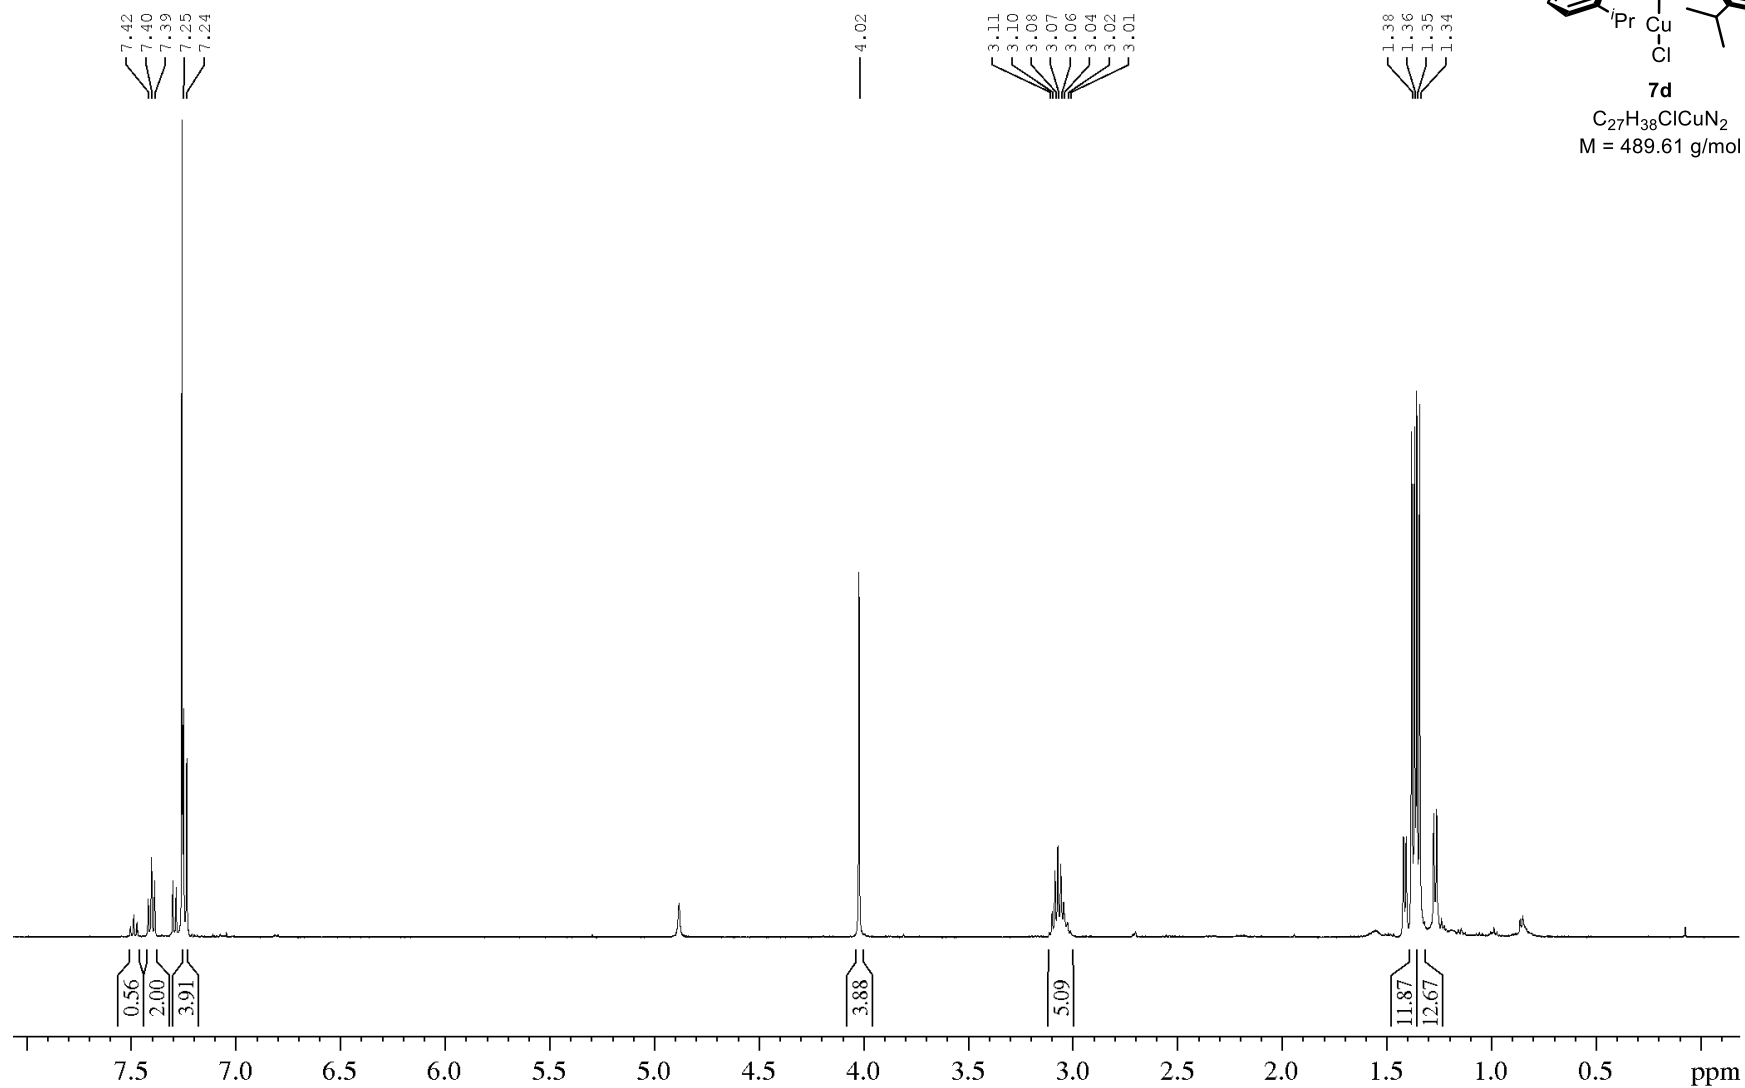

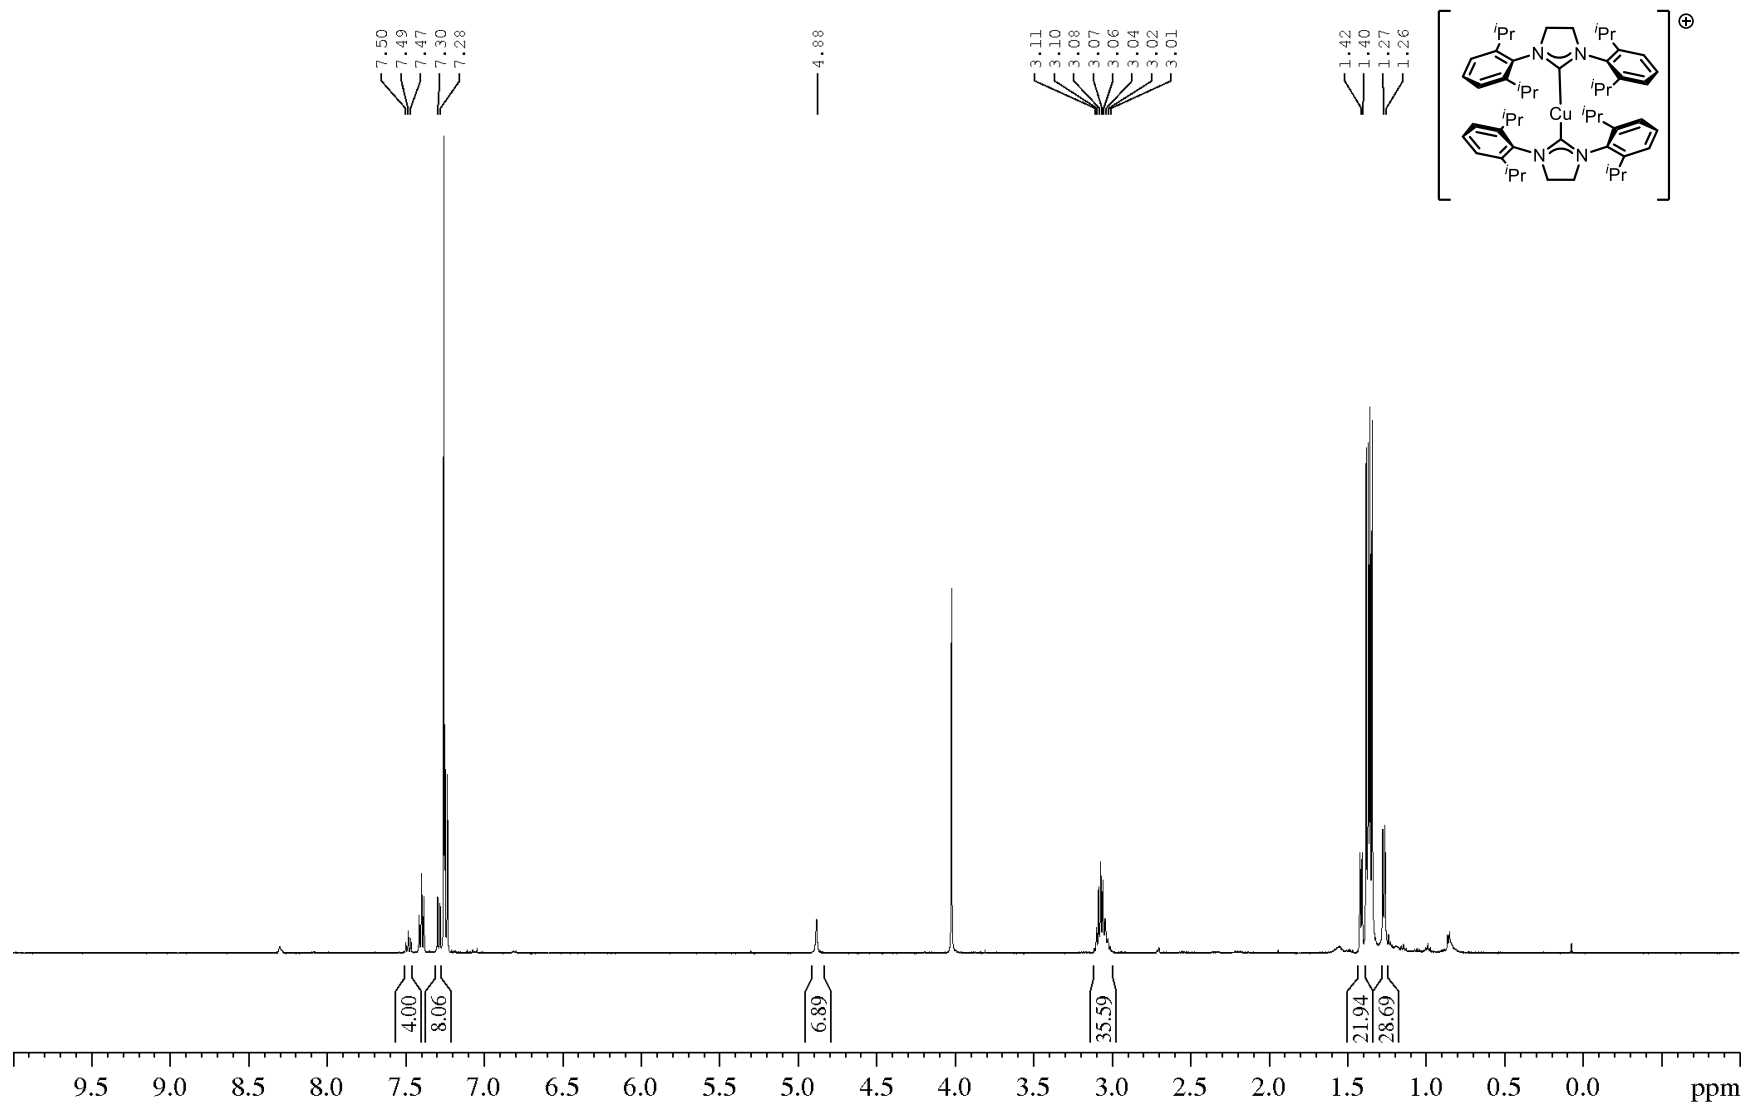

Supplement: Additional file 1 [file 1860-5397-19-34-S1.pdf]
